# Supplementary material for: Identification of novel BRCA1 large genomic rearrangements by a computational algorithm of amplicon-based Next-Generation Sequencing data
Source: PeerJ. 2019 Nov 15;7:e7972. doi: 10.7717/peerj.7972 (PMC6859874; doi:10.7717/peerj.7972)
Supplement: Supplemental Information 1 [file peerj-07-7972-s003.xlsx]

## Sheet: DQB1 analysis TS samples
				BR59 (5) vs all			BR328		BR328 vs all	BR409		BR409 vs all
contig_srt	attributes	BR59 (5) Total reads	amplicon read count normalized on the BRCA1 and BRCA2 total reads	%	contig_srt	attributes	total_reads	amplicon read count normalized on the BRCA1 and BRCA2 total reads	%	total_reads	amplicon read count normalized on the BRCA1 and BRCA2 total reads	%		average of normalized reads (for amplicon) obtained from a reference set of 127 MLPA negative samples
41276113	GENE_ID=BRCA1	26	0.000400043	0.239132	41276113	GENE_ID=BRCA1	11	0.00012216	0.073023	61	0.000757708	0.452932		0.00167289
41276040	GENE_ID=BRCA1	262	0.0040312	0.54835	41276040	GENE_ID=BRCA1	658	0.00730738	0.993995	183	0.00227312	0.309204		0.00735152
41275974	GENE_ID=BRCA1	684	0.0105242	1.51168	41275974	GENE_ID=BRCA1	618	0.00686316	0.985811	210	0.0026085	0.37468		0.00696194
41267746	GENE_ID=BRCA1	473	0.00727771	1.20858	41267746	GENE_ID=BRCA1	550	0.00610799	1.01433	543	0.00674484	1.12008		0.00602172
41267625	GENE_ID=BRCA1	385	0.00592371	0.852472	41267625	GENE_ID=BRCA1	590	0.00655221	0.942917	594	0.00737833	1.0618		0.00694887
41258442	GENE_ID=BRCA1	197	0.0030311	0.539432	41258442	GENE_ID=BRCA1	276	0.0030651	0.545483	451	0.00560207	0.996977		0.00561905
41256826	GENE_ID=BRCA1	428	0.00658532	1.18614	41256826	GENE_ID=BRCA1	499	0.00554161	0.998149	390	0.00484436	0.87256		0.00555189
41256156	GENE_ID=BRCA1	609	0.00937024	1.41824	41256156	GENE_ID=BRCA1	469	0.00520845	0.78833	674	0.00837205	1.26716		0.00660694
41256050	GENE_ID=BRCA1	350	0.0053852	1.1966	41256050	GENE_ID=BRCA1	428	0.00475313	1.05615	334	0.00414876	0.921863		0.00450041
41251798	GENE_ID=BRCA1	393	0.00604681	1.07753	41251798	GENE_ID=BRCA1	856	0.00950625	1.694	662	0.00822299	1.46533		0.00561171
41251703	GENE_ID=BRCA1	249	0.00383118	1.11456	41251703	GENE_ID=BRCA1	281	0.00312063	0.907847	285	0.00354011	1.02988		0.00343739
41249241	GENE_ID=BRCA1	45	0.000692382	0.157963	41249241	GENE_ID=BRCA1	285	0.00316505	0.72209	299	0.00371401	0.847332		0.00438318
41247828	GENE_ID=BRCA1	639	0.00983183	1.09848	41247828	GENE_ID=BRCA1	884	0.0098172	1.09684	666	0.00827268	0.92428		0.0089504
41246850	GENE_ID=BRCA1	283	0.00435432	0.631949	41246850	GENE_ID=BRCA1	671	0.00745175	1.08148	599	0.00744044	1.07984		0.00689029
41246698	GENE_ID=BRCA1	240	0.00369271	0.826649	41246698	GENE_ID=BRCA1	429	0.00476423	1.06652	294	0.0036519	0.817515		0.00446708
41246562	GENE_ID=BRCA1	481	0.0074008	1.06775	41246562	GENE_ID=BRCA1	656	0.00728517	1.05107	528	0.00655852	0.946234		0.00693118
41246406	GENE_ID=BRCA1	576	0.00886249	1.29548	41246406	GENE_ID=BRCA1	722	0.00801812	1.17205	560	0.006956	1.0168		0.0068411
41246277	GENE_ID=BRCA1	692	0.0106473	1.26603	41246277	GENE_ID=BRCA1	636	0.00706306	0.839842	433	0.00537848	0.639536		0.00840998
41246135	GENE_ID=BRCA1	454	0.00698537	1.27223	41246135	GENE_ID=BRCA1	619	0.00687426	1.25199	540	0.00670757	1.22163		0.00549065
41246013	GENE_ID=BRCA1	427	0.00656994	0.904277	41246013	GENE_ID=BRCA1	736	0.0081736	1.125	567	0.00704295	0.969382		0.0072654
41245945	GENE_ID=BRCA1	996	0.0153247	1.58661	41245945	GENE_ID=BRCA1	995	0.0110499	1.14402	653	0.0081112	0.839772		0.00965881
41245803	GENE_ID=BRCA1	494	0.00760082	0.979623	41245803	GENE_ID=BRCA1	759	0.00842903	1.08637	662	0.00822299	1.05981		0.00775892
41245657	GENE_ID=BRCA1	324	0.00498515	0.984869	41245657	GENE_ID=BRCA1	626	0.006952	1.37344	524	0.00650883	1.28589		0.00506174
41245535	GENE_ID=BRCA1	299	0.0046005	0.557279	41245535	GENE_ID=BRCA1	598	0.00664105	0.80446	488	0.00606166	0.734276		0.00825529
41245395	GENE_ID=BRCA1	330	0.00507747	0.83031	41245395	GENE_ID=BRCA1	695	0.00771828	1.26216	482	0.00598713	0.979066		0.00611515
41245286	GENE_ID=BRCA1	440	0.00676996	0.822059	41245286	GENE_ID=BRCA1	784	0.00870666	1.05723	741	0.00920428	1.11765		0.00823537
41245170	GENE_ID=BRCA1	672	0.0103396	1.90722	41245170	GENE_ID=BRCA1	668	0.00741843	1.36839	327	0.00406181	0.749234		0.00542128
41245022	GENE_ID=BRCA1	517	0.0079547	0.915426	41245022	GENE_ID=BRCA1	801	0.00889545	1.02369	697	0.00865774	0.996332		0.00868962
41244878	GENE_ID=BRCA1	283	0.00435432	1.1823	41244878	GENE_ID=BRCA1	624	0.00692979	1.88161	367	0.00455867	1.23779		0.00368291
41244709	GENE_ID=BRCA1	259	0.00398504	0.446656	41244709	GENE_ID=BRCA1	500	0.00555272	0.622366	482	0.00598713	0.671057		0.00892195
41244629	GENE_ID=BRCA1	432	0.00664687	0.803989	41244629	GENE_ID=BRCA1	844	0.00937299	1.13373	598	0.00742802	0.898475		0.00826736
41244483	GENE_ID=BRCA1	397	0.00610835	1.30675	41244483	GENE_ID=BRCA1	582	0.00646336	1.3827	485	0.0060244	1.28879		0.00467445
41244323	GENE_ID=BRCA1	297	0.00456972	0.571783	41244323	GENE_ID=BRCA1	485	0.00538614	0.673936	537	0.00667031	0.834617		0.00799206
41244258	GENE_ID=BRCA1	296	0.00455434	0.561234	41244258	GENE_ID=BRCA1	726	0.00806255	0.993553	534	0.00663305	0.817395		0.00811486
41244100	GENE_ID=BRCA1	419	0.00644685	1.29162	41244100	GENE_ID=BRCA1	609	0.00676321	1.355	513	0.0063722	1.27666		0.0049913
41243946	GENE_ID=BRCA1	366	0.00563138	0.925735	41243946	GENE_ID=BRCA1	677	0.00751838	1.23594	478	0.00593745	0.976049		0.00608314
41243808	GENE_ID=BRCA1	523	0.00804702	1.11385	41243808	GENE_ID=BRCA1	838	0.00930635	1.28817	691	0.00858321	1.18807		0.00722449
41243639	GENE_ID=BRCA1	563	0.00866247	1.2821	41243639	GENE_ID=BRCA1	694	0.00770717	1.14071	627	0.00778824	1.15271		0.00675645
41243471	GENE_ID=BRCA1	160	0.0024618	0.391764	41243471	GENE_ID=BRCA1	463	0.00514182	0.818253	369	0.00458351	0.729406		0.00628389
41243322	GENE_ID=BRCA1	585	0.00900097	1.23065	41243322	GENE_ID=BRCA1	715	0.00794039	1.08564	613	0.00761434	1.04106		0.00731401
41242918	GENE_ID=BRCA1	564	0.00867786	1.16489	41242918	GENE_ID=BRCA1	693	0.00769607	1.0331	583	0.0072417	0.972107		0.00744948
41234528	GENE_ID=BRCA1	173	0.00266183	0.677647	41234528	GENE_ID=BRCA1	260	0.00288741	0.735077	371	0.00460835	1.17319		0.00392804
41234356	GENE_ID=BRCA1	628	0.00966258	1.13961	41234356	GENE_ID=BRCA1	749	0.00831797	0.981026	676	0.00839689	0.990334		0.00847885
41231265	GENE_ID=BRCA1	382	0.00587756	1.36948	41231265	GENE_ID=BRCA1	426	0.00473092	1.10231	418	0.00519216	1.20978		0.0042918
41228577	GENE_ID=BRCA1	815	0.0125398	1.49124	41228577	GENE_ID=BRCA1	785	0.00871777	1.03672	587	0.00729138	0.867093		0.008409
41228420	GENE_ID=BRCA1	523	0.00804702	1.29523	41228420	GENE_ID=BRCA1	545	0.00605246	0.974189	459	0.00570144	0.917689		0.00621282
41226417	GENE_ID=BRCA1	818	0.012586	1.36378	41226417	GENE_ID=BRCA1	929	0.0103169	1.11792	867	0.0107694	1.16694		0.00922873
41226336	GENE_ID=BRCA1	1029	0.0158325	1.76668	41226336	GENE_ID=BRCA1	981	0.0108944	1.21566	465	0.00577597	0.644515		0.00896172
41223148	GENE_ID=BRCA1	469	0.00721616	0.972465	41223148	GENE_ID=BRCA1	718	0.0079737	1.07455	533	0.00662062	0.892209		0.00742048
41223017	GENE_ID=BRCA1	574	0.00883172	1.0327	41223017	GENE_ID=BRCA1	903	0.0100282	1.17261	728	0.0090428	1.05739		0.00855203
41222948	GENE_ID=BRCA1	243	0.00373886	1.34866	41222948	GENE_ID=BRCA1	513	0.00569709	2.05502	265	0.00329168	1.18736		0.00277228
41222877	GENE_ID=BRCA1	465	0.00715462	0.700525	41222877	GENE_ID=BRCA1	1001	0.0111165	1.08845	844	0.0104837	1.02648		0.0102132
41219589	GENE_ID=BRCA1	532	0.0081855	1.46419	41219589	GENE_ID=BRCA1	680	0.0075517	1.35082	507	0.00629767	1.1265		0.00559047
41215856	GENE_ID=BRCA1	140	0.00215408	0.345371	41215856	GENE_ID=BRCA1	186	0.00206561	0.331187	439	0.00545301	0.8743		0.006237
41215278	GENE_ID=BRCA1	469	0.00721616	1.55843	41215278	GENE_ID=BRCA1	214	0.00237656	0.513251	465	0.00577597	1.2474		0.00463042
41209003	GENE_ID=BRCA1	665	0.0102319	1.22384	41209003	GENE_ID=BRCA1	705	0.00782933	0.936469	667	0.0082851	0.990984		0.00836048
41203084	GENE_ID=BRCA1	85	0.00130783	0.220604	41203084	GENE_ID=BRCA1	387	0.0042978	0.724949	342	0.00424813	0.71657		0.00592842
41202931	GENE_ID=BRCA1	406	0.00624683	1.2052	41202931	GENE_ID=BRCA1	542	0.00601915	1.16128	478	0.00593745	1.14551		0.00518322
41201075	GENE_ID=BRCA1	567	0.00872402	1.0574	41201075	GENE_ID=BRCA1	750	0.00832908	1.00954	716	0.00889375	1.07798		0.00825041
41199644	GENE_ID=BRCA1	524	0.00806241	0.651772	41199644	GENE_ID=BRCA1	1133	0.0125825	1.01718	648	0.00804909	0.650695		0.01237
41199641	GENE_ID=BRCA1	178	0.00273876	0.346653	41199641	GENE_ID=BRCA1	869	0.00965062	1.22151	645	0.00801183	1.01408		0.00790057
41197743	GENE_ID=BRCA1	305	0.00469281	0.405251	41197743	GENE_ID=BRCA1	1058	0.0117496	1.01464	914	0.0113532	0.980412		0.01158
41197603	GENE_ID=BRCA1	315	0.00484668	0.503966	41197603	GENE_ID=BRCA1	826	0.00917309	0.953834	475	0.00590018	0.613511		0.00961707
32972809	GENE_ID=BRCA2	352	0.00541597	1.09641	32972809	GENE_ID=BRCA2	384	0.00426449	0.863306	397	0.00493131	0.998297		0.00493972
32972688	GENE_ID=BRCA2	530	0.00815472	0.989569	32972688	GENE_ID=BRCA2	761	0.00845124	1.02555	660	0.00819815	0.994838		0.00824068
32972534	GENE_ID=BRCA2	185	0.00284646	0.510566	32972534	GENE_ID=BRCA2	381	0.00423117	0.758939	328	0.00407423	0.730789		0.00557511
32972377	GENE_ID=BRCA2	458	0.00704691	0.907208	32972377	GENE_ID=BRCA2	771	0.00856229	1.1023	614	0.00762676	0.981857		0.00776769
32972201	GENE_ID=BRCA2	409	0.00629299	1.51196	32972201	GENE_ID=BRCA2	428	0.00475313	1.14199	481	0.00597471	1.43549		0.00416215
32971071	GENE_ID=BRCA2	282	0.00433893	0.817454	32971071	GENE_ID=BRCA2	331	0.0036759	0.692539	382	0.00474499	0.893956		0.00530786
32970902	GENE_ID=BRCA2	395	0.00607758	1.51916	32970902	GENE_ID=BRCA2	342	0.00379806	0.94937	346	0.00429782	1.07429		0.00400061
32968978	GENE_ID=BRCA2	333	0.00512363	0.816377	32968978	GENE_ID=BRCA2	546	0.00606357	0.966143	595	0.00739075	1.17761		0.00627606
32968840	GENE_ID=BRCA2	215	0.00330805	0.56512	32968840	GENE_ID=BRCA2	438	0.00486418	0.830956	427	0.00530395	0.906083		0.00585371
32968693	GENE_ID=BRCA2	161	0.00247719	0.688934	32968693	GENE_ID=BRCA2	354	0.00393132	1.09335	366	0.00454625	1.26436		0.00359568
32954203	GENE_ID=BRCA2	464	0.00713923	1.26017	32954203	GENE_ID=BRCA2	438	0.00486418	0.858594	584	0.00725412	1.28045		0.00566529
32954056	GENE_ID=BRCA2	91	0.00140015	0.203101	32954056	GENE_ID=BRCA2	362	0.00402017	0.58315	408	0.00506795	0.735137		0.00689388
32954024	GENE_ID=BRCA2	44	0.000676996	1.51548	32954024	GENE_ID=BRCA2	44	0.000488639	1.09384	43	0.000534122	1.19565		0.00044672
32953881	GENE_ID=BRCA2	520	0.00800086	1.33086	32953881	GENE_ID=BRCA2	619	0.00687426	1.14346	607	0.00753981	1.25417		0.0060118
32953584	GENE_ID=BRCA2	412	0.00633914	1.56025	32953584	GENE_ID=BRCA2	380	0.00422007	1.03868	298	0.00370159	0.911071		0.0040629
32953471	GENE_ID=BRCA2	468	0.00720078	0.813072	32953471	GENE_ID=BRCA2	892	0.00990605	1.11854	530	0.00658336	0.743357		0.00885626
32953316	GENE_ID=BRCA2	125	0.00192328	0.422805	32953316	GENE_ID=BRCA2	406	0.00450881	0.991193	337	0.00418602	0.920234		0.00454887
32950844	GENE_ID=BRCA2	466	0.00717	0.78815	32950844	GENE_ID=BRCA2	891	0.00989494	1.08768	617	0.00766403	0.842455		0.00909725
32950739	GENE_ID=BRCA2	419	0.00644685	0.894705	32950739	GENE_ID=BRCA2	678	0.00752948	1.04496	607	0.00753981	1.04639		0.00720556
32945202	GENE_ID=BRCA2	13	0.000200022	0.330641	32945202	GENE_ID=BRCA2	8	8.88435e-05	0.14686	52	0.000645915	1.06771		0.000604952
32945049	GENE_ID=BRCA2	103	0.00158479	3.59936	32945049	GENE_ID=BRCA2	171	0.00189903	4.31306	124	0.00154026	3.49822		0.000440297
32944566	GENE_ID=BRCA2	452	0.0069546	1.40968	32944566	GENE_ID=BRCA2	367	0.00407569	0.826133	492	0.00611135	1.23875		0.00493346
32944476	GENE_ID=BRCA2	274	0.00421584	1.42065	32944476	GENE_ID=BRCA2	185	0.00205451	0.692327	338	0.00419844	1.41479		0.00296754
32937669	GENE_ID=BRCA2	371	0.00570831	1.27455	32937669	GENE_ID=BRCA2	430	0.00477534	1.06623	412	0.00511763	1.14266		0.0044787
32937551	GENE_ID=BRCA2	316	0.00486206	0.912456	32937551	GENE_ID=BRCA2	525	0.00583035	1.09417	431	0.00535364	1.00471		0.00532854
32937396	GENE_ID=BRCA2	198	0.00304648	0.729616	32937396	GENE_ID=BRCA2	458	0.00508629	1.21814	280	0.003478	0.832962		0.00417546
32937281	GENE_ID=BRCA2	561	0.0086317	1.08148	32937281	GENE_ID=BRCA2	789	0.00876219	1.09783	778	0.00966388	1.2108		0.0079814
32936704	GENE_ID=BRCA2	415	0.0063853	1.16911	32936704	GENE_ID=BRCA2	531	0.00589699	1.0797	511	0.00634735	1.16216		0.00546168
32936625	GENE_ID=BRCA2	369	0.00567753	1.03355	32936625	GENE_ID=BRCA2	338	0.00375364	0.683318	284	0.00352769	0.642186		0.00549325
32931954	GENE_ID=BRCA2	404	0.00621605	0.804252	32931954	GENE_ID=BRCA2	757	0.00840681	1.0877	746	0.00926639	1.19891		0.00772899
32931882	GENE_ID=BRCA2	388	0.00596987	0.766692	32931882	GENE_ID=BRCA2	656	0.00728517	0.93561	632	0.00785035	1.00819		0.00778654
32931801	GENE_ID=BRCA2	11	0.000169249	0.0765641	32931801	GENE_ID=BRCA2	27	0.000299847	0.135643	143	0.00177627	0.803538		0.00221055
32930743	GENE_ID=BRCA2	292	0.00449279	0.619333	32930743	GENE_ID=BRCA2	432	0.00479755	0.661344	676	0.00839689	1.15751		0.00725424
32930604	GENE_ID=BRCA2	636	0.00978567	1.22371	32930604	GENE_ID=BRCA2	679	0.00754059	0.942961	529	0.00657094	0.821705		0.00799671
32930410	GENE_ID=BRCA2	17	0.000261567	0.124432	32930410	GENE_ID=BRCA2	148	0.0016436	0.781893	110	0.00136636	0.650002		0.00210208
32929223	GENE_ID=BRCA2	474	0.00729309	1.81363	32929223	GENE_ID=BRCA2	383	0.00425338	1.05772	418	0.00519216	1.29117		0.00402128
32929068	GENE_ID=BRCA2	418	0.00643146	1.37878	32929068	GENE_ID=BRCA2	473	0.00525287	1.12612	463	0.00575112	1.23293		0.00466459
32928914	GENE_ID=BRCA2	95	0.0014617	0.384863	32928914	GENE_ID=BRCA2	205	0.00227661	0.599429	196	0.0024346	0.641027		0.00379797
32920982	GENE_ID=BRCA2	512	0.00787777	1.1147	32920982	GENE_ID=BRCA2	651	0.00722964	1.02299	590	0.00732865	1.037		0.00706715
32920865	GENE_ID=BRCA2	48	0.000738541	0.277336	32920865	GENE_ID=BRCA2	23	0.000255425	0.0959168	127	0.00157752	0.592388		0.00266299
32918626	GENE_ID=BRCA2	9	0.000138476	0.0958072	32918626	GENE_ID=BRCA2	49	0.000544166	0.37649	134	0.00166447	1.15159		0.00144537
32915285	GENE_ID=BRCA2	560	0.00861631	0.981674	32915285	GENE_ID=BRCA2	760	0.00844013	0.961601	712	0.00884406	1.00762		0.00877716
32915186	GENE_ID=BRCA2	443	0.00681612	1.27203	32915186	GENE_ID=BRCA2	503	0.00558603	1.04247	443	0.0055027	1.02691		0.00535848
32915034	GENE_ID=BRCA2	72	0.00110781	0.222017	32915034	GENE_ID=BRCA2	264	0.00293183	0.587571	337	0.00418602	0.838923		0.00498976
32914877	GENE_ID=BRCA2	479	0.00737002	1.36594	32914877	GENE_ID=BRCA2	515	0.0057193	1.06	708	0.00879438	1.62992		0.00539559
32914740	GENE_ID=BRCA2	400	0.00615451	1.23884	32914740	GENE_ID=BRCA2	396	0.00439775	0.885225	459	0.00570144	1.14764		0.00496795
32914665	GENE_ID=BRCA2	562	0.00864709	1.03468	32914665	GENE_ID=BRCA2	614	0.00681874	0.815903	376	0.00467046	0.558848		0.00835729
32914500	GENE_ID=BRCA2	545	0.00838552	1.49903	32914500	GENE_ID=BRCA2	597	0.00662994	1.18519	533	0.00662062	1.18353		0.00559398
32914403	GENE_ID=BRCA2	508	0.00781623	1.02986	32914403	GENE_ID=BRCA2	750	0.00832908	1.09743	655	0.00813604	1.072		0.00758962
32914318	GENE_ID=BRCA2	900	0.0138476	1.65342	32914318	GENE_ID=BRCA2	620	0.00688537	0.822117	338	0.00419844	0.501296		0.00837517
32914173	GENE_ID=BRCA2	463	0.00712384	1.72407	32914173	GENE_ID=BRCA2	595	0.00660773	1.59916	457	0.0056766	1.37381		0.004132
32914026	GENE_ID=BRCA2	541	0.00832397	1.34659	32914026	GENE_ID=BRCA2	635	0.00705195	1.14081	597	0.0074156	1.19964		0.00618151
32913899	GENE_ID=BRCA2	460	0.00707769	1.00283	32913899	GENE_ID=BRCA2	474	0.00526398	0.745846	442	0.00549027	0.77791		0.00705772
32913762	GENE_ID=BRCA2	504	0.00775468	1.1543	32913762	GENE_ID=BRCA2	677	0.00751838	1.11913	536	0.00665789	0.99104		0.00671808
32913556	GENE_ID=BRCA2	160	0.0024618	0.845644	32913556	GENE_ID=BRCA2	209	0.00232104	0.79729	418	0.00519216	1.78354		0.00291116
32913468	GENE_ID=BRCA2	720	0.0110781	1.28951	32913468	GENE_ID=BRCA2	776	0.00861782	1.00313	545	0.00676968	0.788004		0.00859093
32913326	GENE_ID=BRCA2	387	0.00595449	1.01947	32913326	GENE_ID=BRCA2	684	0.00759612	1.30053	586	0.00727896	1.24623		0.00584077
32913282	GENE_ID=BRCA2	351	0.00540058	1.04989	32913282	GENE_ID=BRCA2	567	0.00629678	1.22411	629	0.00781308	1.51888		0.00514397
32913170	GENE_ID=BRCA2	430	0.0066161	1.47749	32913170	GENE_ID=BRCA2	476	0.00528619	1.1805	289	0.00358979	0.801664		0.00447793
32913092	GENE_ID=BRCA2	276	0.00424661	0.699264	32913092	GENE_ID=BRCA2	709	0.00787375	1.29652	488	0.00606166	0.998138		0.00607297
32912987	GENE_ID=BRCA2	362	0.00556983	0.81471	32912987	GENE_ID=BRCA2	884	0.0098172	1.43598	567	0.00704295	1.03019		0.00683658
32912830	GENE_ID=BRCA2	81	0.00124629	0.244292	32912830	GENE_ID=BRCA2	340	0.00377585	0.740125	364	0.0045214	0.886265		0.00510164
32912744	GENE_ID=BRCA2	566	0.00870863	1.34279	32912744	GENE_ID=BRCA2	819	0.00909535	1.40241	623	0.00773855	1.19321		0.0064855
32912642	GENE_ID=BRCA2	533	0.00820088	1.08243	32912642	GENE_ID=BRCA2	722	0.00801812	1.05831	685	0.00850868	1.12306		0.00757633
32912492	GENE_ID=BRCA2	98	0.00150785	0.276287	32912492	GENE_ID=BRCA2	341	0.00378695	0.693891	452	0.00561449	1.02875		0.00545756
32912369	GENE_ID=BRCA2	381	0.00586217	1.52281	32912369	GENE_ID=BRCA2	323	0.00358706	0.931804	487	0.00604924	1.5714		0.00384958
32912221	GENE_ID=BRCA2	204	0.0031388	1.33158	32912221	GENE_ID=BRCA2	240	0.0026653	1.13071	382	0.00474499	2.01298		0.00235719
32912112	GENE_ID=BRCA2	621	0.00955488	1.21011	32912112	GENE_ID=BRCA2	587	0.00651889	0.825607	482	0.00598713	0.758261		0.00789587
32911942	GENE_ID=BRCA2	663	0.0102011	1.50465	32911942	GENE_ID=BRCA2	640	0.00710748	1.04835	592	0.00735349	1.08463		0.00677971
32911783	GENE_ID=BRCA2	488	0.0075085	1.2147	32911783	GENE_ID=BRCA2	450	0.00499745	0.808469	484	0.00601197	0.972596		0.00618137
32911558	GENE_ID=BRCA2	32	0.000492361	0.149064	32911558	GENE_ID=BRCA2	175	0.00194345	0.588386	182	0.0022607	0.684435		0.00330302
32911487	GENE_ID=BRCA2	810	0.0124629	1.45107	32911487	GENE_ID=BRCA2	904	0.0100393	1.16889	738	0.00916702	1.06733		0.00858877
32911328	GENE_ID=BRCA2	365	0.00561599	1.11529	32911328	GENE_ID=BRCA2	476	0.00528619	1.0498	506	0.00628525	1.2482		0.00503544
32911239	GENE_ID=BRCA2	795	0.0122321	1.73208	32911239	GENE_ID=BRCA2	676	0.00750727	1.06304	389	0.00483194	0.684211		0.00706206
32911145	GENE_ID=BRCA2	412	0.00633914	0.792601	32911145	GENE_ID=BRCA2	884	0.0098172	1.22747	763	0.00947755	1.185		0.0079979
32911006	GENE_ID=BRCA2	205	0.00315419	0.661085	32911006	GENE_ID=BRCA2	374	0.00415343	0.870517	413	0.00513005	1.07521		0.00477122
32910962	GENE_ID=BRCA2	102	0.0015694	0.351514	32910962	GENE_ID=BRCA2	278	0.00308731	0.691496	268	0.00332894	0.745618		0.00446468
32910799	GENE_ID=BRCA2	578	0.00889327	1.20436	32910799	GENE_ID=BRCA2	604	0.00670768	0.908379	664	0.00824783	1.11695		0.00738423
32910628	GENE_ID=BRCA2	482	0.00741618	1.45945	32910628	GENE_ID=BRCA2	427	0.00474202	0.933192	526	0.00653367	1.28577		0.00508151
32910478	GENE_ID=BRCA2	387	0.00595449	0.874198	32910478	GENE_ID=BRCA2	457	0.00507518	0.745104	471	0.0058505	0.85893		0.00681137
32910325	GENE_ID=BRCA2	608	0.00935485	1.48567	32910325	GENE_ID=BRCA2	781	0.00867334	1.37744	787	0.00977567	1.5525		0.00629673
32907510	GENE_ID=BRCA2	269	0.00413891	0.927968	32907510	GENE_ID=BRCA2	294	0.003265	0.732032	444	0.00551512	1.23652		0.00446019
32907354	GENE_ID=BRCA2	69	0.00106165	0.264277	32907354	GENE_ID=BRCA2	293	0.00325389	0.809992	367	0.00455867	1.13479		0.00401719
32907270	GENE_ID=BRCA2	249	0.00383118	0.983721	32907270	GENE_ID=BRCA2	429	0.00476423	1.2233	437	0.00542817	1.39377		0.00389458
32907126	GENE_ID=BRCA2	584	0.00898558	1.33773	32907126	GENE_ID=BRCA2	649	0.00720743	1.07301	582	0.00722927	1.07626		0.00671704
32906979	GENE_ID=BRCA2	258	0.00396966	0.538823	32906979	GENE_ID=BRCA2	474	0.00526398	0.714508	542	0.00673242	0.913827		0.00736728
32906844	GENE_ID=BRCA2	501	0.00770852	1.26788	32906844	GENE_ID=BRCA2	523	0.00580814	0.955313	500	0.00621072	1.02153		0.00607983
32906761	GENE_ID=BRCA2	297	0.00456972	0.693284	32906761	GENE_ID=BRCA2	614	0.00681874	1.03449	484	0.00601197	0.912092		0.00659141
32906649	GENE_ID=BRCA2	223	0.00343114	0.648456	32906649	GENE_ID=BRCA2	628	0.00697421	1.31807	384	0.00476983	0.901458		0.00529124
32906432	GENE_ID=BRCA2	285	0.00438509	1.51424	32906432	GENE_ID=BRCA2	206	0.00228772	0.789988	333	0.00413634	1.42835		0.00289589
32906268	GENE_ID=BRCA2	420	0.00646223	1.29515	32906268	GENE_ID=BRCA2	326	0.00362037	0.725588	480	0.00596229	1.19495		0.00498957
32905132	GENE_ID=BRCA2	71	0.00109243	0.326823	32905132	GENE_ID=BRCA2	368	0.0040868	1.22266	335	0.00416118	1.24491		0.00334256
32904954	GENE_ID=BRCA2	409	0.00629299	1.37773	32904954	GENE_ID=BRCA2	472	0.00524177	1.14759	389	0.00483194	1.05786		0.00456764
32903521	GENE_ID=BRCA2	204	0.0031388	1.56746	32903521	GENE_ID=BRCA2	127	0.00141039	0.704322	312	0.00387549	1.93534		0.00200248
32900654	GENE_ID=BRCA2	567	0.00872402	1.11568	32900654	GENE_ID=BRCA2	570	0.0063301	0.809529	522	0.00648399	0.829209		0.00781949
32900497	GENE_ID=BRCA2	624	0.00960103	1.47287	32900497	GENE_ID=BRCA2	718	0.0079737	1.22323	716	0.00889375	1.36437		0.00651859
32900398	GENE_ID=BRCA2	361	0.00555444	0.607225	32900398	GENE_ID=BRCA2	718	0.0079737	0.871704	731	0.00908007	0.992655		0.00914726
32900295	GENE_ID=BRCA2	89	0.00136938	0.622414	32900295	GENE_ID=BRCA2	93	0.00103281	0.469434	153	0.00190048	0.863812		0.00220011
32900212	GENE_ID=BRCA2	398	0.00612374	1.40114	32900212	GENE_ID=BRCA2	395	0.00438665	1.00368	360	0.00447172	1.02315		0.00437055
32899235	GENE_ID=BRCA2	285	0.00438509	1.35122	32899235	GENE_ID=BRCA2	265	0.00294294	0.906839	310	0.00385064	1.18654		0.00324527
32899095	GENE_ID=BRCA2	345	0.00530826	1.05907	32899095	GENE_ID=BRCA2	321	0.00356484	0.711232	315	0.00391275	0.780644		0.00501221
32893271	GENE_ID=BRCA2	436	0.00670841	1.36413	32893271	GENE_ID=BRCA2	405	0.0044977	0.914591	570	0.00708022	1.43974		0.00491772
32893189	GENE_ID=BRCA2	308	0.00473897	0.854708	32893189	GENE_ID=BRCA2	570	0.0063301	1.14168	586	0.00727896	1.31281		0.00554455
32890544	GENE_ID=BRCA2	88	0.00135399	0.243115	32890544	GENE_ID=BRCA2	244	0.00270973	0.486543	355	0.00440961	0.791764		0.00556935
		64993					90046			80506
