# Supplementary material for: Identification of novel BRCA1 large genomic rearrangements by a computational algorithm of amplicon-based Next-Generation Sequencing data
Source: PeerJ. 2019 Nov 15;7:e7972. doi: 10.7717/peerj.7972 (PMC6859874; doi:10.7717/peerj.7972)
Supplement: Supplemental Information 2 [file peerj-07-7972-s004.xlsx]

## Sheet: baseline 127_x_pool (1)
contig_srt	attributes	total_reads	amplicon read count normalized on the BRCA1 and BRCA2 total reads	%	contig_srt	attributes	total_reads	amplicon read count normalized on the BRCA1 and BRCA2 total reads	%	contig_srt	attributes	total_reads	amplicon read count normalized on the BRCA1 and BRCA2 total reads	%	average of normalized reads (for amplicon) obtained from a reference set of 127 MLPA negative samples, divided for each primer pool	contig_srt	contig_end	region_id	gene_id
41275974	GENE_ID=BRCA1	886	0.020495	0.933975	41275974	GENE_ID=BRCA1	1484	0.0230013	1.04819	41275974	GENE_ID=BRCA1	512	0.0243265	1.10858	0.0219439	41275974	41276070	AMPL223412702	Pool=1;
41258442	GENE_ID=BRCA1	592	0.0136942	0.781792	41258442	GENE_ID=BRCA1	953	0.0147711	0.84327	41258442	GENE_ID=BRCA1	277	0.013161	0.751353	0.0175164	41258442	41258601	AMPL223512658	Pool=1;
41256050	GENE_ID=BRCA1	818	0.018922	1.33978	41256050	GENE_ID=BRCA1	1014	0.0157165	1.11281	41256050	GENE_ID=BRCA1	421	0.0200029	1.41631	0.0141233	41256050	41256159	AMPL223494542	Pool=1;
41249241	GENE_ID=BRCA1	598	0.013833	1.00709	41249241	GENE_ID=BRCA1	863	0.0133761	0.973824	41249241	GENE_ID=BRCA1	272	0.0129235	0.940869	0.0137357	41249241	41249367	AMPL224329257	Pool=1;
41246698	GENE_ID=BRCA1	705	0.0163081	1.16325	41246698	GENE_ID=BRCA1	930	0.0144146	1.02819	41246698	GENE_ID=BRCA1	323	0.0153466	1.09467	0.0140194	41246698	41246855	AMPL223529883	Pool=1;
41246277	GENE_ID=BRCA1	1147	0.0265325	1.00579	41246277	GENE_ID=BRCA1	1580	0.0244893	0.928341	41246277	GENE_ID=BRCA1	542	0.0257519	0.976203	0.0263796	41246277	41246411	AMPL223799398	Pool=1;
41245945	GENE_ID=BRCA1	1140	0.0263706	0.866255	41245945	GENE_ID=BRCA1	2279	0.0353235	1.16035	41245945	GENE_ID=BRCA1	801	0.0380577	1.25017	0.030442	41245945	41246020	AMPL223472652	Pool=1;
41245535	GENE_ID=BRCA1	1213	0.0280592	1.08181	41245535	GENE_ID=BRCA1	1624	0.0251713	0.970466	41245535	GENE_ID=BRCA1	602	0.0286027	1.10276	0.0259373	41245535	41245660	AMPL223446640	Pool=1;
41245170	GENE_ID=BRCA1	734	0.0169789	0.998071	41245170	GENE_ID=BRCA1	1028	0.0159335	0.936619	41245170	GENE_ID=BRCA1	327	0.0155367	0.913289	0.0170118	41245170	41245291	AMPL223445345	Pool=1;
41244709	GENE_ID=BRCA1	1135	0.0262549	0.942327	41244709	GENE_ID=BRCA1	1612	0.0249853	0.896758	41244709	GENE_ID=BRCA1	495	0.0235188	0.844124	0.0278618	41244709	41244881	AMPL223824773	Pool=1;
41244323	GENE_ID=BRCA1	1056	0.0244275	0.97707	41244323	GENE_ID=BRCA1	1392	0.0215754	0.86299	41244323	GENE_ID=BRCA1	454	0.0215708	0.862805	0.0250007	41244323	41244486	AMPL223816314	Pool=1;
41243946	GENE_ID=BRCA1	810	0.018737	0.986456	41243946	GENE_ID=BRCA1	1125	0.017437	0.918015	41243946	GENE_ID=BRCA1	386	0.0183399	0.965551	0.0189942	41243946	41244104	AMPL223772396	Pool=1;
41243471	GENE_ID=BRCA1	1187	0.0274578	1.39401	41243471	GENE_ID=BRCA1	1331	0.0206299	1.04736	41243471	GENE_ID=BRCA1	421	0.0200029	1.01553	0.019697	41243471	41243644	AMPL223785198	Pool=1;
41234528	GENE_ID=BRCA1	451	0.0104326	0.851307	41234528	GENE_ID=BRCA1	715	0.0110822	0.904316	41234528	GENE_ID=BRCA1	228	0.0108329	0.883975	0.0122548	41234528	41234677	AMPL223729615	Pool=1;
41228577	GENE_ID=BRCA1	1117	0.0258385	0.977619	41228577	GENE_ID=BRCA1	2028	0.0314331	1.18929	41228577	GENE_ID=BRCA1	617	0.0293153	1.10917	0.0264301	41228577	41228665	AMPL223494068	Pool=1;
41226336	GENE_ID=BRCA1	1293	0.0299098	1.0572	41226336	GENE_ID=BRCA1	1840	0.0285192	1.00805	41226336	GENE_ID=BRCA1	841	0.0399582	1.41237	0.0282915	41226336	41226421	AMPL223461311	Pool=1;
41222948	GENE_ID=BRCA1	327	0.00756419	0.86352	41222948	GENE_ID=BRCA1	496	0.00768778	0.877629	41222948	GENE_ID=BRCA1	98	0.00465625	0.531552	0.00875971	41222948	41223022	AMPL223735053	Pool=1;
41215856	GENE_ID=BRCA1	822	0.0190146	0.97588	41215856	GENE_ID=BRCA1	1232	0.0190954	0.980031	41215856	GENE_ID=BRCA1	362	0.0171996	0.882731	0.0194845	41215856	41216026	AMPL223644811	Pool=1;
41203084	GENE_ID=BRCA1	998	0.0230858	1.24468	41203084	GENE_ID=BRCA1	609	0.00943923	0.508919	41203084	GENE_ID=BRCA1	377	0.0179123	0.965747	0.0185476	41203084	41203254	AMPL225467112	Pool=1;
41199644	GENE_ID=BRCA1	1955	0.0452232	1.15172	41199644	GENE_ID=BRCA1	2617	0.0405623	1.03302	41199644	GENE_ID=BRCA1	1135	0.0539269	1.37338	0.0392659	41199644	41199740	AMPL223552235	Pool=1;
41197603	GENE_ID=BRCA1	1578	0.0365024	1.20576	41197603	GENE_ID=BRCA1	2093	0.0324406	1.07159	41197603	GENE_ID=BRCA1	627	0.0297905	0.984048	0.0302734	41197603	41197752	AMPL223954665	Pool=1;
32972534	GENE_ID=BRCA2	763	0.0176498	1.01255	32972534	GENE_ID=BRCA2	1140	0.0176695	1.01368	32972534	GENE_ID=BRCA2	336	0.0159643	0.91585	0.0174311	32972534	32972692	AMPL223687587	Pool=1;
32971071	GENE_ID=BRCA2	657	0.0151978	0.916602	32971071	GENE_ID=BRCA2	1032	0.0159955	0.964715	32971071	GENE_ID=BRCA2	315	0.0149665	0.902653	0.0165806	32971071	32971223	AMPL223383847	Pool=1;
32968840	GENE_ID=BRCA2	649	0.0150127	0.819334	32968840	GENE_ID=BRCA2	1081	0.016755	0.914421	32968840	GENE_ID=BRCA2	342	0.0162493	0.886824	0.0183231	32968840	32968983	AMPL223655460	Pool=1;
32954056	GENE_ID=BRCA2	1094	0.0253065	1.17025	32954056	GENE_ID=BRCA2	1467	0.0227378	1.05147	32954056	GENE_ID=BRCA2	491	0.0233287	1.07879	0.0216249	32954056	32954208	AMPL223974027	Pool=1;
32953316	GENE_ID=BRCA2	660	0.0152672	1.07545	32953316	GENE_ID=BRCA2	806	0.0124926	0.880003	32953316	GENE_ID=BRCA2	302	0.0143488	1.01076	0.0141961	32953316	32953476	AMPL225397395	Pool=1;
32945202	GENE_ID=BRCA2	40	0.000925283	0.473725	32945202	GENE_ID=BRCA2	184	0.00285192	1.46012	32945202	GENE_ID=BRCA2	97	0.00460873	2.35957	0.00195321	32945202	32945279	AMPL223392219	Pool=1;
32944476	GENE_ID=BRCA2	351	0.00811936	0.87058	32944476	GENE_ID=BRCA2	623	0.00965622	1.03537	32944476	GENE_ID=BRCA2	219	0.0104053	1.11568	0.00932638	32944476	32944571	AMPL223399241	Pool=1;
32937396	GENE_ID=BRCA2	549	0.0126995	0.973261	32937396	GENE_ID=BRCA2	745	0.0115472	0.884948	32937396	GENE_ID=BRCA2	227	0.0107854	0.826567	0.0130484	32937396	32937556	AMPL223527025	Pool=1;
32936625	GENE_ID=BRCA2	686	0.0158686	0.919182	32936625	GENE_ID=BRCA2	1060	0.0164295	0.951672	32936625	GENE_ID=BRCA2	364	0.0172946	1.00178	0.0172638	32936625	32936723	AMPL223561501	Pool=1;
32931801	GENE_ID=BRCA2	386	0.00892898	1.25914	32931801	GENE_ID=BRCA2	695	0.0107722	1.51906	32931801	GENE_ID=BRCA2	333	0.0158217	2.23113	0.00709136	32931801	32931881	AMPL223379892	Pool=1;
32930410	GENE_ID=BRCA2	333	0.00770298	1.17338	32930410	GENE_ID=BRCA2	426	0.00660281	1.00579	32930410	GENE_ID=BRCA2	98	0.00465625	0.709275	0.00656479	32930410	32930609	AMPL225316548	Pool=1;
32928914	GENE_ID=BRCA2	495	0.0114504	0.965117	32928914	GENE_ID=BRCA2	693	0.0107412	0.905341	32928914	GENE_ID=BRCA2	217	0.0103103	0.86902	0.0118642	32928914	32929081	AMPL223640152	Pool=1;
32918626	GENE_ID=BRCA2	299	0.00691649	1.53589	32918626	GENE_ID=BRCA2	361	0.00559534	1.24251	32918626	GENE_ID=BRCA2	95	0.00451371	1.00232	0.00450324	32918626	32918845	AMPL224626553	Pool=1;
32915034	GENE_ID=BRCA2	835	0.0193153	1.23678	32915034	GENE_ID=BRCA2	1111	0.01722	1.10262	32915034	GENE_ID=BRCA2	284	0.0134936	0.864013	0.0156174	32915034	32915201	AMPL223508272	Pool=1;
32914665	GENE_ID=BRCA2	1151	0.026625	1.00882	32914665	GENE_ID=BRCA2	1910	0.0296041	1.1217	32914665	GENE_ID=BRCA2	648	0.0307882	1.16656	0.0263923	32914665	32914762	AMPL223968715	Pool=1;
32914318	GENE_ID=BRCA2	1155	0.0267176	1.01388	32914318	GENE_ID=BRCA2	1747	0.0270777	1.02755	32914318	GENE_ID=BRCA2	583	0.0276999	1.05116	0.0263517	32914318	32914408	AMPL223971510	Pool=1;
32913899	GENE_ID=BRCA2	899	0.0207957	0.940107	32913899	GENE_ID=BRCA2	1421	0.0220249	0.995671	32913899	GENE_ID=BRCA2	457	0.0217133	0.981587	0.0221206	32913899	32914029	AMPL223959466	Pool=1;
32913468	GENE_ID=BRCA2	1062	0.0245663	0.910956	32913468	GENE_ID=BRCA2	1851	0.0286897	1.06386	32913468	GENE_ID=BRCA2	424	0.0201454	0.747023	0.0269676	32913468	32913565	AMPL223561388	Pool=1;
32913170	GENE_ID=BRCA2	489	0.0113116	0.805404	32913170	GENE_ID=BRCA2	781	0.0121051	0.861906	32913170	GENE_ID=BRCA2	287	0.0136361	0.970916	0.0140446	32913170	32913296	AMPL223953315	Pool=1;
32912830	GENE_ID=BRCA2	623	0.0144113	0.906129	32912830	GENE_ID=BRCA2	987	0.0152981	0.961886	32912830	GENE_ID=BRCA2	277	0.013161	0.827517	0.0159042	32912830	32912990	AMPL223944537	Pool=1;
32912492	GENE_ID=BRCA2	816	0.0188758	1.10666	32912492	GENE_ID=BRCA2	1164	0.0180415	1.05774	32912492	GENE_ID=BRCA2	282	0.0133986	0.785538	0.0170566	32912492	32912655	AMPL223536535	Pool=1;
32912112	GENE_ID=BRCA2	1038	0.0240111	0.967493	32912112	GENE_ID=BRCA2	1673	0.0259307	1.04484	32912112	GENE_ID=BRCA2	504	0.0239464	0.964887	0.0248178	32912112	32912226	AMPL223959719	Pool=1;
32911558	GENE_ID=BRCA2	269	0.00622253	0.604231	32911558	GENE_ID=BRCA2	705	0.0109272	1.06107	32911558	GENE_ID=BRCA2	171	0.00812467	0.788936	0.0102983	32911558	32911789	AMPL223940727	Pool=1;
32911239	GENE_ID=BRCA2	910	0.0210502	0.948776	32911239	GENE_ID=BRCA2	1412	0.0218854	0.986418	32911239	GENE_ID=BRCA2	492	0.0233763	1.05362	0.0221867	32911239	32911331	AMPL223943910	Pool=1;
32910962	GENE_ID=BRCA2	786	0.0181818	1.29675	32910962	GENE_ID=BRCA2	1028	0.0159335	1.1364	32910962	GENE_ID=BRCA2	328	0.0155842	1.11148	0.0140211	32910962	32911111	AMPL223937849	Pool=1;
32910478	GENE_ID=BRCA2	567	0.0131159	0.617722	32910478	GENE_ID=BRCA2	1110	0.0172045	0.810284	32910478	GENE_ID=BRCA2	309	0.0146814	0.691454	0.0212327	32910478	32910632	AMPL223451547	Pool=1;
32907354	GENE_ID=BRCA2	637	0.0147351	1.1715	32907354	GENE_ID=BRCA2	964	0.0149416	1.18792	32907354	GENE_ID=BRCA2	304	0.0144439	1.14835	0.012578	32907354	32907513	AMPL223702682	Pool=1;
32906979	GENE_ID=BRCA2	950	0.0219755	0.953873	32906979	GENE_ID=BRCA2	1475	0.0228618	0.992346	32906979	GENE_ID=BRCA2	447	0.0212382	0.921869	0.0230382	32906979	32907141	AMPL223713442	Pool=1;
32906649	GENE_ID=BRCA2	749	0.0173259	1.04252	32906649	GENE_ID=BRCA2	1159	0.017964	1.08091	32906649	GENE_ID=BRCA2	355	0.016867	1.0149	0.0166193	32906649	32906767	AMPL223708535	Pool=1;
32905132	GENE_ID=BRCA2	530	0.01226	1.16259	32905132	GENE_ID=BRCA2	851	0.0131901	1.25079	32905132	GENE_ID=BRCA2	161	0.00764955	0.725388	0.0105455	32905132	32905249	AMPL223515418	Pool=1;
32900654	GENE_ID=BRCA2	874	0.0202174	0.824157	32900654	GENE_ID=BRCA2	1640	0.0254193	1.03621	32900654	GENE_ID=BRCA2	466	0.0221409	0.902567	0.0245311	32900654	32900776	AMPL223384089	Pool=1;
32900295	GENE_ID=BRCA2	239	0.00552857	0.802372	32900295	GENE_ID=BRCA2	569	0.00881924	1.27995	32900295	GENE_ID=BRCA2	146	0.00693686	1.00676	0.00689028	32900295	32900403	AMPL225286773	Pool=1;
32899095	GENE_ID=BRCA2	480	0.0111034	0.707995	32899095	GENE_ID=BRCA2	857	0.0132831	0.846982	32899095	GENE_ID=BRCA2	283	0.0134461	0.857374	0.0156829	32899095	32899240	AMPL225496394	Pool=1;
32890544	GENE_ID=BRCA2	647	0.0149665	0.862048	32890544	GENE_ID=BRCA2	945	0.0146471	0.843652	32890544	GENE_ID=BRCA2	285	0.0135411	0.779951	0.0173615	32890544	32890720	AMPL223487194	Pool=1;
		43230					64518					21047
		BR1154	BR1154				BR963	BR963				BR1379	BR1379
		43230					64518					21047
															mean DQ	1
															STDEV	0.290099		0.580199	2STDEV

## Sheet: baseline 127_x_pool (2)
contig_srt	attributes	total_reads	amplicon read count normalized on the BRCA1 and BRCA2 total reads	%	contig_srt	attributes	total_reads	amplicon read count normalized on the BRCA1 and BRCA2 total reads	%	contig_srt	attributes	total_reads	amplicon read count normalized on the BRCA1 and BRCA2 total reads	%	average of normalized reads (for amplicon) obtained from a reference set of 127 MLPA negative samples, divided for each primer pool	contig_srt	contig_end	region_id	gene_id
41276040	GENE_ID=BRCA1	1764	0.0282869	1.31504	41276040	GENE_ID=BRCA1	1160	0.024128	1.12169	41276040	GENE_ID=BRCA1	1008	0.0270749	1.2587	0.0215103	41276040	41276116	AMPL223413081	Pool=2;
41267625	GENE_ID=BRCA1	1312	0.0210388	1.03177	41267625	GENE_ID=BRCA1	1038	0.0215904	1.05882	41267625	GENE_ID=BRCA1	822	0.022079	1.08278	0.0203909	41267625	41267763	AMPL225279430	Pool=2;
41256156	GENE_ID=BRCA1	940	0.0150735	0.773585	41256156	GENE_ID=BRCA1	990	0.020592	1.0568	41256156	GENE_ID=BRCA1	654	0.0175665	0.901526	0.0194853	41256156	41256341	AMPL223495326	Pool=2;
41251703	GENE_ID=BRCA1	402	0.00644634	0.637868	41251703	GENE_ID=BRCA1	329	0.00684319	0.677137	41251703	GENE_ID=BRCA1	340	0.00913242	0.903658	0.0101061	41251703	41251803	AMPL223585101	Pool=2;
41246850	GENE_ID=BRCA1	1261	0.020221	0.99991	41246850	GENE_ID=BRCA1	1117	0.0232336	1.14888	41246850	GENE_ID=BRCA1	772	0.020736	1.02538	0.0202228	41246850	41246950	AMPL223534004	Pool=2;
41246406	GENE_ID=BRCA1	1345	0.021568	1.06957	41246406	GENE_ID=BRCA1	976	0.0203008	1.00672	41246406	GENE_ID=BRCA1	728	0.0195541	0.969698	0.0201652	41246406	41246566	AMPL223784919	Pool=2;
41246013	GENE_ID=BRCA1	1446	0.0231876	1.08801	41246013	GENE_ID=BRCA1	1004	0.0208832	0.979884	41246013	GENE_ID=BRCA1	810	0.0217566	1.02087	0.0213119	41246013	41246138	AMPL223778197	Pool=2;
41245657	GENE_ID=BRCA1	1041	0.0166931	1.12082	41245657	GENE_ID=BRCA1	663	0.0137904	0.925922	41245657	GENE_ID=BRCA1	534	0.0143433	0.963044	0.0148937	41245657	41245806	AMPL223459101	Pool=2;
41245286	GENE_ID=BRCA1	1606	0.0257533	1.06285	41245286	GENE_ID=BRCA1	1281	0.0266448	1.09965	41245286	GENE_ID=BRCA1	944	0.0253559	1.04645	0.0242303	41245286	41245406	AMPL223472632	Pool=2;
41244878	GENE_ID=BRCA1	551	0.00883565	0.816062	41244878	GENE_ID=BRCA1	362	0.00752959	0.695434	41244878	GENE_ID=BRCA1	372	0.00999194	0.922857	0.0108272	41244878	41245027	AMPL223846208	Pool=2;
41244483	GENE_ID=BRCA1	668	0.0107118	0.777584	41244483	GENE_ID=BRCA1	539	0.0112112	0.813833	41244483	GENE_ID=BRCA1	447	0.0120064	0.871562	0.0137758	41244483	41244639	AMPL223779507	Pool=2;
41244100	GENE_ID=BRCA1	880	0.0141114	0.958339	41244100	GENE_ID=BRCA1	679	0.0141232	0.95914	41244100	GENE_ID=BRCA1	511	0.0137255	0.932132	0.0147248	41244100	41244263	AMPL223794189	Pool=2;
41243639	GENE_ID=BRCA1	1235	0.019804	0.996318	41243639	GENE_ID=BRCA1	899	0.0186992	0.940733	41243639	GENE_ID=BRCA1	696	0.0186946	0.940503	0.0198772	41243639	41243811	AMPL223833516	Pool=2;
41242918	GENE_ID=BRCA1	1407	0.0225622	1.03019	41242918	GENE_ID=BRCA1	1137	0.0236496	1.07984	41242918	GENE_ID=BRCA1	811	0.0217835	0.99464	0.0219009	41242918	41243091	AMPL223600147	Pool=2;
41231265	GENE_ID=BRCA1	869	0.013935	1.10149	41231265	GENE_ID=BRCA1	625	0.013	1.02758	41231265	GENE_ID=BRCA1	450	0.012087	0.955416	0.0126511	41231265	41231442	AMPL225427005	Pool=2;
41226417	GENE_ID=BRCA1	1561	0.0250317	0.925679	41226417	GENE_ID=BRCA1	1113	0.0231504	0.856107	41226417	GENE_ID=BRCA1	1087	0.0291969	1.07971	0.0270414	41226417	41226558	AMPL223475559	Pool=2;
41223017	GENE_ID=BRCA1	1825	0.0292651	1.1656	41223017	GENE_ID=BRCA1	1261	0.0262288	1.04467	41223017	GENE_ID=BRCA1	501	0.0134569	0.535975	0.0251073	41223017	41223151	AMPL223742628	Pool=2;
41219589	GENE_ID=BRCA1	906	0.0145283	0.882299	41219589	GENE_ID=BRCA1	643	0.0133744	0.812221	41219589	GENE_ID=BRCA1	323	0.0086758	0.526878	0.0164664	41219589	41219746	AMPL223501558	Pool=2;
41209003	GENE_ID=BRCA1	795	0.0127484	0.518335	41209003	GENE_ID=BRCA1	1499	0.0311792	1.26771	41209003	GENE_ID=BRCA1	875	0.0235026	0.955589	0.0245948	41209003	41209178	AMPL223712774	Pool=2;
41201075	GENE_ID=BRCA1	1622	0.0260098	1.07252	41201075	GENE_ID=BRCA1	529	0.0110032	0.45372	41201075	GENE_ID=BRCA1	902	0.0242278	0.999041	0.024251	41201075	41201254	AMPL223384214	Pool=2;
41197743	GENE_ID=BRCA1	2855	0.0457818	1.34988	41197743	GENE_ID=BRCA1	1966	0.0408927	1.20573	41197743	GENE_ID=BRCA1	1470	0.0394843	1.1642	0.0339155	41197743	41197840	AMPL223530147	Pool=2;
32972688	GENE_ID=BRCA2	1542	0.024727	1.02253	32972688	GENE_ID=BRCA2	1076	0.0223808	0.925505	32972688	GENE_ID=BRCA2	992	0.0266452	1.10185	0.0241822	32972688	32972813	AMPL223695109	Pool=2;
32972201	GENE_ID=BRCA2	616	0.00987797	0.80206	32972201	GENE_ID=BRCA2	606	0.0126048	1.02347	32972201	GENE_ID=BRCA2	426	0.0114424	0.929086	0.0123157	32972201	32972381	AMPL225441321	Pool=2;
32968978	GENE_ID=BRCA2	1154	0.0185052	0.999357	32968978	GENE_ID=BRCA2	979	0.0203632	1.0997	32968978	GENE_ID=BRCA2	649	0.0174322	0.941411	0.0185171	32968978	32969118	AMPL223661627	Pool=2;
32954203	GENE_ID=BRCA2	909	0.0145764	0.872862	32954203	GENE_ID=BRCA2	812	0.0168896	1.01138	32954203	GENE_ID=BRCA2	600	0.016116	0.965057	0.0166996	32954203	32954342	AMPL223976001	Pool=2;
32953881	GENE_ID=BRCA2	1080	0.0173185	0.978495	32953881	GENE_ID=BRCA2	824	0.0171392	0.968362	32953881	GENE_ID=BRCA2	481	0.0129197	0.729961	0.0176991	32953881	32954028	AMPL223496623	Pool=2;
32953471	GENE_ID=BRCA2	1890	0.0303074	1.16596	32953471	GENE_ID=BRCA2	1278	0.0265824	1.02265	32953471	GENE_ID=BRCA2	1107	0.0297341	1.1439	0.0259936	32953471	32953587	AMPL223492069	Pool=2;
32950739	GENE_ID=BRCA2	1385	0.0222094	1.0507	32950739	GENE_ID=BRCA2	927	0.0192816	0.912189	32950739	GENE_ID=BRCA2	851	0.0228579	1.08138	0.0211377	32950739	32950849	AMPL223443450	Pool=2;
32944566	GENE_ID=BRCA2	1018	0.0163243	1.1178	32944566	GENE_ID=BRCA2	861	0.0179088	1.22629	32944566	GENE_ID=BRCA2	539	0.0144776	0.991342	0.014604	32944566	32944754	AMPL223399434	Pool=2;
32937551	GENE_ID=BRCA2	1160	0.0186014	1.18604	32937551	GENE_ID=BRCA2	760	0.015808	1.00793	32937551	GENE_ID=BRCA2	583	0.0156594	0.99846	0.0156836	32937551	32937680	AMPL223535206	Pool=2;
32936704	GENE_ID=BRCA2	944	0.0151377	0.941651	32936704	GENE_ID=BRCA2	700	0.01456	0.905716	32936704	GENE_ID=BRCA2	626	0.0168144	1.04595	0.0160757	32936704	32936857	AMPL223567016	Pool=2;
32931882	GENE_ID=BRCA2	1382	0.0221613	0.97104	32931882	GENE_ID=BRCA2	1173	0.0243984	1.06906	32931882	GENE_ID=BRCA2	996	0.0267526	1.17222	0.0228222	32931882	32931968	AMPL225553304	Pool=2;
32930604	GENE_ID=BRCA2	1675	0.0268597	1.14123	32930604	GENE_ID=BRCA2	1043	0.0216944	0.921762	32930604	GENE_ID=BRCA2	979	0.026296	1.11728	0.0235358	32930604	32930748	AMPL223514682	Pool=2;
32929068	GENE_ID=BRCA2	817	0.0131011	0.951418	32929068	GENE_ID=BRCA2	635	0.013208	0.959177	32929068	GENE_ID=BRCA2	505	0.0135643	0.985055	0.0137701	32929068	32929233	AMPL223651946	Pool=2;
32920865	GENE_ID=BRCA2	522	0.00837062	1.08015	32920865	GENE_ID=BRCA2	566	0.0117728	1.51917	32920865	GENE_ID=BRCA2	520	0.0139672	1.80235	0.00774947	32920865	32920986	AMPL225504179	Pool=2;
32915186	GENE_ID=BRCA2	1003	0.0160838	1.01976	32915186	GENE_ID=BRCA2	670	0.013936	0.883584	32915186	GENE_ID=BRCA2	564	0.0151491	0.960498	0.0157721	32915186	32915339	AMPL223512345	Pool=2;
32914740	GENE_ID=BRCA2	702	0.011257	0.768371	32914740	GENE_ID=BRCA2	732	0.0152256	1.03925	32914740	GENE_ID=BRCA2	505	0.0135643	0.92586	0.0146505	32914740	32914895	AMPL223970291	Pool=2;
32914403	GENE_ID=BRCA2	1258	0.0201729	0.908137	32914403	GENE_ID=BRCA2	803	0.0167024	0.751903	32914403	GENE_ID=BRCA2	874	0.0234757	1.05682	0.0222135	32914403	32914505	AMPL223961153	Pool=2;
32914026	GENE_ID=BRCA2	1050	0.0168374	0.925676	32914026	GENE_ID=BRCA2	835	0.017368	0.954842	32914026	GENE_ID=BRCA2	658	0.0176739	0.971662	0.0181894	32914026	32914176	AMPL223963545	Pool=2;
32913556	GENE_ID=BRCA2	583	0.00934879	1.08196	32913556	GENE_ID=BRCA2	569	0.0118352	1.36972	32913556	GENE_ID=BRCA2	251	0.00674187	0.780256	0.0086406	32913556	32913797	AMPL223562902	Pool=2;
32913282	GENE_ID=BRCA2	824	0.0132134	0.872637	32913282	GENE_ID=BRCA2	589	0.0122512	0.809091	32913282	GENE_ID=BRCA2	541	0.0145313	0.959673	0.0151419	32913282	32913419	AMPL223957475	Pool=2;
32912987	GENE_ID=BRCA2	1485	0.023813	1.18943	32912987	GENE_ID=BRCA2	1012	0.0210496	1.0514	32912987	GENE_ID=BRCA2	677	0.0181843	0.908279	0.0200206	32912987	32913097	AMPL223945399	Pool=2;
32912642	GENE_ID=BRCA2	1123	0.018008	0.809101	32912642	GENE_ID=BRCA2	885	0.018408	0.827069	32912642	GENE_ID=BRCA2	860	0.0230997	1.03787	0.0222569	32912642	32912763	AMPL223538053	Pool=2;
32912221	GENE_ID=BRCA2	314	0.0050352	0.722351	32912221	GENE_ID=BRCA2	350	0.00727999	1.04439	32912221	GENE_ID=BRCA2	235	0.00631211	0.905538	0.00697057	32912221	32912384	AMPL223960586	Pool=2;
32911783	GENE_ID=BRCA2	815	0.0130691	0.71727	32911783	GENE_ID=BRCA2	698	0.0145184	0.796813	32911783	GENE_ID=BRCA2	614	0.0164921	0.905135	0.0182206	32911783	32911947	AMPL223942326	Pool=2;
32911328	GENE_ID=BRCA2	982	0.015747	1.05744	32911328	GENE_ID=BRCA2	781	0.0162448	1.09087	32911328	GENE_ID=BRCA2	507	0.013618	0.914477	0.0148916	32911328	32911492	AMPL223938117	Pool=2;
32911006	GENE_ID=BRCA2	1114	0.0178637	1.26775	32911006	GENE_ID=BRCA2	809	0.0168272	1.19419	32911006	GENE_ID=BRCA2	606	0.0162772	1.15516	0.0140909	32911006	32911158	AMPL223938554	Pool=2;
32910628	GENE_ID=BRCA2	823	0.0131974	0.879119	32910628	GENE_ID=BRCA2	779	0.0162032	1.07935	32910628	GENE_ID=BRCA2	571	0.0153371	1.02165	0.015012	32910628	32910804	AMPL223459067	Pool=2;
32907510	GENE_ID=BRCA2	908	0.0145604	1.10272	32907510	GENE_ID=BRCA2	801	0.0166608	1.2618	32907510	GENE_ID=BRCA2	456	0.0122482	0.927611	0.013204	32907510	32907682	AMPL225349438	Pool=2;
32907126	GENE_ID=BRCA2	1160	0.0186014	0.94068	32907126	GENE_ID=BRCA2	972	0.0202176	1.02241	32907126	GENE_ID=BRCA2	629	0.016895	0.854387	0.0197744	32907126	32907280	AMPL223730276	Pool=2;
32906761	GENE_ID=BRCA2	1501	0.0240695	1.24618	32906761	GENE_ID=BRCA2	906	0.0188448	0.975671	32906761	GENE_ID=BRCA2	825	0.0221595	1.14729	0.0193147	32906761	32906849	AMPL223712318	Pool=2;
32906268	GENE_ID=BRCA2	782	0.0125399	0.85333	32906268	GENE_ID=BRCA2	700	0.01456	0.990795	32906268	GENE_ID=BRCA2	455	0.0122213	0.831652	0.0146952	32906268	32906437	AMPL225338331	Pool=2;
32903521	GENE_ID=BRCA2	366	0.00586905	0.988718	32903521	GENE_ID=BRCA2	375	0.00779999	1.31401	32903521	GENE_ID=BRCA2	208	0.00558689	0.941184	0.00593602	32903521	32903739	AMPL225492147	Pool=2;
32900398	GENE_ID=BRCA2	1813	0.0290727	1.08369	32900398	GENE_ID=BRCA2	1513	0.0314703	1.17307	32900398	GENE_ID=BRCA2	1258	0.03379	1.25953	0.0268274	32900398	32900481	AMPL223549286	Pool=2;
32899235	GENE_ID=BRCA2	515	0.00825837	0.861562	32899235	GENE_ID=BRCA2	504	0.0104832	1.09367	32899235	GENE_ID=BRCA2	369	0.00991136	1.03401	0.00958534	32899235	32899405	AMPL223581748	Pool=2;
32893189	GENE_ID=BRCA2	855	0.0137105	0.842929	32893189	GENE_ID=BRCA2	744	0.0154752	0.951423	32893189	GENE_ID=BRCA2	656	0.0176202	1.0833	0.0162653	32893189	32893277	AMPL223519297	Pool=2;
		62361					48077					37230
		BR1154	BR1154				BR963	BR963				BR1379	BR1379
		124722					48077					37230
															mean DQ	1
															STDEV	0.197005		0.394009	2STDEV

## Sheet: baseline 127_x_pool (3)
contig_srt	attributes	total_reads	amplicon read count normalized on the BRCA1 and BRCA2 total reads	%	contig_srt	attributes	total_reads	amplicon read count normalized on the BRCA1 and BRCA2 total reads	%	contig_srt	attributes	total_reads	amplicon read count normalized on the BRCA1 and BRCA2 total reads	%	average of normalized reads (for amplicon) obtained from a reference set of 127 MLPA negative samples, divided for each primer pool	contig_srt	contig_end	region_id	gene_id
41276113	GENE_ID=BRCA1	451	0.00531144	1.09303	41276113	GENE_ID=BRCA1	578	0.008047	1.65597	41276113	GENE_ID=BRCA1	348	0.00974845	2.0061	0.00485939	41276113	41276248	AMPL225438570	Pool=3;
41267746	GENE_ID=BRCA1	1751	0.0206216	1.1621	41267746	GENE_ID=BRCA1	1294	0.0180153	1.01523	41267746	GENE_ID=BRCA1	633	0.0177321	0.999268	0.0177451	41267746	41267902	AMPL223575711	Pool=3;
41256826	GENE_ID=BRCA1	1722	0.0202801	1.24089	41256826	GENE_ID=BRCA1	1092	0.015203	0.930239	41256826	GENE_ID=BRCA1	622	0.0174239	1.06613	0.0163431	41256826	41256997	AMPL223422356	Pool=3;
41251798	GENE_ID=BRCA1	1951	0.022977	1.3882	41251798	GENE_ID=BRCA1	1244	0.0173192	1.04637	41251798	GENE_ID=BRCA1	652	0.0182643	1.10347	0.0165517	41251798	41251946	AMPL223595832	Pool=3;
41247828	GENE_ID=BRCA1	2043	0.0240605	0.912962	41247828	GENE_ID=BRCA1	1827	0.0254358	0.965146	41247828	GENE_ID=BRCA1	999	0.0279848	1.06187	0.0263543	41247828	41247981	AMPL223643501	Pool=3;
41246562	GENE_ID=BRCA1	1614	0.0190081	0.932076	41246562	GENE_ID=BRCA1	1622	0.0225817	1.10731	41246562	GENE_ID=BRCA1	684	0.0191607	0.939559	0.0203933	41246562	41246702	AMPL223802517	Pool=3;
41246135	GENE_ID=BRCA1	1455	0.0171356	1.05997	41246135	GENE_ID=BRCA1	989	0.013769	0.851724	41246135	GENE_ID=BRCA1	547	0.015323	0.94785	0.016166	41246135	41246293	AMPL223787752	Pool=3;
41245803	GENE_ID=BRCA1	1969	0.023189	1.01458	41245803	GENE_ID=BRCA1	1773	0.024684	1.07999	41245803	GENE_ID=BRCA1	842	0.0235868	1.03198	0.0228557	41245803	41245955	AMPL223470437	Pool=3;
41245395	GENE_ID=BRCA1	1563	0.0184075	1.02417	41245395	GENE_ID=BRCA1	1232	0.0171521	0.954323	41245395	GENE_ID=BRCA1	583	0.0163314	0.908664	0.017973	41245395	41245538	AMPL223426628	Pool=3;
41245022	GENE_ID=BRCA1	2155	0.0253795	0.990595	41245022	GENE_ID=BRCA1	1911	0.0266052	1.03844	41245022	GENE_ID=BRCA1	955	0.0267522	1.04417	0.0256205	41245022	41245175	AMPL223419559	Pool=3;
41244629	GENE_ID=BRCA1	2064	0.0243078	0.999241	41244629	GENE_ID=BRCA1	1808	0.0251712	1.03473	41244629	GENE_ID=BRCA1	865	0.024231	0.996086	0.0243263	41244629	41244712	AMPL223810801	Pool=3;
41244258	GENE_ID=BRCA1	2265	0.026675	1.11693	41244258	GENE_ID=BRCA1	1851	0.0257699	1.07903	41244258	GENE_ID=BRCA1	934	0.0261639	1.09553	0.0238824	41244258	41244328	AMPL223807632	Pool=3;
41243808	GENE_ID=BRCA1	1241	0.0146153	0.687902	41243808	GENE_ID=BRCA1	1371	0.0190873	0.898385	41243808	GENE_ID=BRCA1	747	0.0209255	0.984908	0.0212462	41243808	41243950	AMPL223853466	Pool=3;
41243322	GENE_ID=BRCA1	1786	0.0210338	0.977702	41243322	GENE_ID=BRCA1	1584	0.0220527	1.02506	41243322	GENE_ID=BRCA1	805	0.0225503	1.04819	0.0215135	41243322	41243475	AMPL225526024	Pool=3;
41234356	GENE_ID=BRCA1	2300	0.0270872	1.08602	41234356	GENE_ID=BRCA1	1875	0.026104	1.0466	41234356	GENE_ID=BRCA1	967	0.0270884	1.08607	0.0249416	41234356	41234533	AMPL223718840	Pool=3;
41228420	GENE_ID=BRCA1	1791	0.0210927	1.15171	41228420	GENE_ID=BRCA1	1348	0.0187671	1.02472	41228420	GENE_ID=BRCA1	649	0.0181803	0.992685	0.0183143	41228420	41228581	AMPL223493831	Pool=3;
41223148	GENE_ID=BRCA1	1899	0.0223646	1.02331	41223148	GENE_ID=BRCA1	1604	0.0223311	1.02178	41223148	GENE_ID=BRCA1	421	0.0117934	0.539614	0.0218552	41223148	41223295	AMPL223757220	Pool=3;
41222877	GENE_ID=BRCA1	2425	0.0285593	0.951201	41222877	GENE_ID=BRCA1	2479	0.034513	1.1495	41222877	GENE_ID=BRCA1	588	0.0164715	0.548603	0.0300245	41222877	41222975	AMPL223735034	Pool=3;
41215278	GENE_ID=BRCA1	890	0.0104816	0.768413	41215278	GENE_ID=BRCA1	725	0.0100936	0.739967	41215278	GENE_ID=BRCA1	502	0.0140624	1.03093	0.0136405	41215278	41215458	AMPL223567715	Pool=3;
41202931	GENE_ID=BRCA1	1301	0.0153219	1.00482	41202931	GENE_ID=BRCA1	494	0.00687754	0.451033	41202931	GENE_ID=BRCA1	566	0.0158552	1.0398	0.0152484	41202931	41203087	AMPL225444087	Pool=3;
41199641	GENE_ID=BRCA1	2269	0.0267221	1.15012	41199641	GENE_ID=BRCA1	1986	0.0276494	1.19003	41199641	GENE_ID=BRCA1	926	0.0259398	1.11645	0.0232342	41199641	41199737	AMPL223551867	Pool=3;
32972809	GENE_ID=BRCA2	1359	0.016005	1.09983	32972809	GENE_ID=BRCA2	1071	0.0149106	1.02462	32972809	GENE_ID=BRCA2	616	0.0172559	1.18578	0.0145523	32972809	32972979	AMPL223665841	Pool=3;
32972377	GENE_ID=BRCA2	2216	0.0260979	1.1407	32972377	GENE_ID=BRCA2	1895	0.0263825	1.15314	32972377	GENE_ID=BRCA2	866	0.0242591	1.06033	0.0228788	32972377	32972540	AMPL223668583	Pool=3;
32970902	GENE_ID=BRCA2	1322	0.0155692	1.31967	32970902	GENE_ID=BRCA2	882	0.0122793	1.04081	32970902	GENE_ID=BRCA2	415	0.0116253	0.985375	0.0117978	32970902	32971076	AMPL225422159	Pool=3;
32968693	GENE_ID=BRCA2	1112	0.0130961	1.23608	32968693	GENE_ID=BRCA2	874	0.012168	1.14848	32968693	GENE_ID=BRCA2	421	0.0117934	1.11313	0.0105948	32968693	32968845	AMPL225282203	Pool=3;
32954024	GENE_ID=BRCA2	48	0.000565298	0.42834	32954024	GENE_ID=BRCA2	38	0.000529042	0.400868	32954024	GENE_ID=BRCA2	30	0.000840383	0.636779	0.00131974	32954024	32954154	AMPL225505032	Pool=3;
32953584	GENE_ID=BRCA2	902	0.0106229	0.88617	32953584	GENE_ID=BRCA2	776	0.0108036	0.901244	32953584	GENE_ID=BRCA2	397	0.0111211	0.927729	0.0119874	32953584	32953756	AMPL225430386	Pool=3;
32950844	GENE_ID=BRCA2	2592	0.0305261	1.14143	32950844	GENE_ID=BRCA2	2277	0.0317007	1.18536	32950844	GENE_ID=BRCA2	1070	0.0299737	1.12078	0.0267437	32950844	32950958	AMPL223453270	Pool=3;
32945049	GENE_ID=BRCA2	58	0.000683068	0.527202	32945049	GENE_ID=BRCA2	39	0.000542964	0.419067	32945049	GENE_ID=BRCA2	68	0.00190487	1.47021	0.00129565	32945049	32945210	AMPL223390724	Pool=3;
32937669	GENE_ID=BRCA2	1115	0.0131314	0.993534	32937669	GENE_ID=BRCA2	804	0.0111934	0.846904	32937669	GENE_ID=BRCA2	401	0.0112331	0.849909	0.0132169	32937669	32937823	AMPL225375036	Pool=3;
32937281	GENE_ID=BRCA2	2021	0.0238014	1.0144	32937281	GENE_ID=BRCA2	1732	0.0241132	1.02769	32937281	GENE_ID=BRCA2	892	0.0249874	1.06495	0.0234635	32937281	32937401	AMPL223521635	Pool=3;
32931954	GENE_ID=BRCA2	1908	0.0224706	0.986876	32931954	GENE_ID=BRCA2	1835	0.0255471	1.12199	32931954	GENE_ID=BRCA2	883	0.0247353	1.08634	0.0227694	32931954	32932101	AMPL223387024	Pool=3;
32930743	GENE_ID=BRCA2	1885	0.0221997	1.04408	32930743	GENE_ID=BRCA2	2030	0.028262	1.32919	32930743	GENE_ID=BRCA2	912	0.0255476	1.20154	0.0212625	32930743	32930833	AMPL223516044	Pool=3;
32929223	GENE_ID=BRCA2	1134	0.0133552	1.12512	32929223	GENE_ID=BRCA2	734	0.0102189	0.860897	32929223	GENE_ID=BRCA2	377	0.0105608	0.889705	0.01187	32929223	32929454	AMPL223655821	Pool=3;
32920982	GENE_ID=BRCA2	1544	0.0181837	0.873602	32920982	GENE_ID=BRCA2	1390	0.0193518	0.929718	32920982	GENE_ID=BRCA2	761	0.0213177	1.02417	0.0208147	32920982	32921117	AMPL223467279	Pool=3;
32915285	GENE_ID=BRCA2	2197	0.0258742	1.00181	32915285	GENE_ID=BRCA2	1972	0.0274545	1.063	32915285	GENE_ID=BRCA2	1059	0.0296655	1.14861	0.0258274	32915285	32915417	AMPL223513904	Pool=3;
32914877	GENE_ID=BRCA2	1021	0.0120244	0.756057	32914877	GENE_ID=BRCA2	1020	0.0142006	0.892892	32914877	GENE_ID=BRCA2	526	0.0147347	0.926477	0.015904	32914877	32915037	AMPL223505511	Pool=3;
32914500	GENE_ID=BRCA2	1285	0.0151335	0.917111	32914500	GENE_ID=BRCA2	1177	0.0163864	0.993037	32914500	GENE_ID=BRCA2	524	0.0146787	0.889549	0.0165013	32914500	32914668	AMPL223966229	Pool=3;
32914173	GENE_ID=BRCA2	805	0.00948051	0.779566	32914173	GENE_ID=BRCA2	664	0.00924431	0.760143	32914173	GENE_ID=BRCA2	443	0.0124097	1.02042	0.0121613	32914173	32914327	AMPL223966767	Pool=3;
32913762	GENE_ID=BRCA2	1190	0.0140147	0.707781	32913762	GENE_ID=BRCA2	1305	0.0181684	0.917557	32913762	GENE_ID=BRCA2	665	0.0186285	0.940793	0.0198008	32913762	32913904	AMPL223565001	Pool=3;
32913326	GENE_ID=BRCA2	1574	0.0185371	1.07731	32913326	GENE_ID=BRCA2	1245	0.0173331	1.00734	32913326	GENE_ID=BRCA2	638	0.0178721	1.03867	0.0172067	32913326	32913473	AMPL223957592	Pool=3;
32913092	GENE_ID=BRCA2	1292	0.0152159	0.852506	32913092	GENE_ID=BRCA2	1140	0.0158712	0.889222	32913092	GENE_ID=BRCA2	679	0.0190207	1.06568	0.0178485	32913092	32913174	AMPL223951958	Pool=3;
32912744	GENE_ID=BRCA2	1291	0.0152042	0.796417	32912744	GENE_ID=BRCA2	1110	0.0154536	0.809482	32912744	GENE_ID=BRCA2	624	0.01748	0.915627	0.0190907	32912744	32912837	AMPL223539987	Pool=3;
32912369	GENE_ID=BRCA2	770	0.00906832	0.798313	32912369	GENE_ID=BRCA2	770	0.0107201	0.943721	32912369	GENE_ID=BRCA2	359	0.0100566	0.885314	0.0113593	32912369	32912544	AMPL223535414	Pool=3;
32911942	GENE_ID=BRCA2	1379	0.0162405	0.813656	32911942	GENE_ID=BRCA2	1386	0.0192961	0.966741	32911942	GENE_ID=BRCA2	677	0.0189646	0.950135	0.0199599	32911942	32912115	AMPL223950043	Pool=3;
32911487	GENE_ID=BRCA2	1921	0.0226237	0.893925	32911487	GENE_ID=BRCA2	1678	0.0233614	0.923073	32911487	GENE_ID=BRCA2	850	0.0238109	0.940833	0.0253083	32911487	32911650	AMPL223938949	Pool=3;
32911145	GENE_ID=BRCA2	1992	0.0234599	0.997646	32911145	GENE_ID=BRCA2	1707	0.0237651	1.01063	32911145	GENE_ID=BRCA2	826	0.0231386	0.983982	0.0235152	32911145	32911242	AMPL223943450	Pool=3;
32910799	GENE_ID=BRCA2	1430	0.0168412	0.774068	32910799	GENE_ID=BRCA2	1447	0.0201453	0.925938	32910799	GENE_ID=BRCA2	773	0.0216539	0.995274	0.0217567	32910799	32910969	AMPL223470236	Pool=3;
32910325	GENE_ID=BRCA2	1805	0.0212576	1.14366	32910325	GENE_ID=BRCA2	1603	0.0223172	1.20066	32910325	GENE_ID=BRCA2	669	0.0187405	1.00824	0.0185874	32910325	32910478	AMPL223448105	Pool=3;
32907270	GENE_ID=BRCA2	1201	0.0141442	1.23219	32907270	GENE_ID=BRCA2	830	0.0115554	1.00666	32907270	GENE_ID=BRCA2	348	0.00974845	0.849249	0.0114789	32907270	32907445	AMPL223730984	Pool=3;
32906844	GENE_ID=BRCA2	1558	0.0183486	1.02433	32906844	GENE_ID=BRCA2	1231	0.0171382	0.956754	32906844	GENE_ID=BRCA2	692	0.0193848	1.08218	0.0179128	32906844	32907001	AMPL223702361	Pool=3;
32906432	GENE_ID=BRCA2	962	0.0113295	1.32512	32906432	GENE_ID=BRCA2	664	0.00924431	1.08123	32906432	GENE_ID=BRCA2	276	0.00773153	0.904293	0.0085498	32906432	32906669	AMPL223697121	Pool=3;
32904954	GENE_ID=BRCA2	1220	0.014368	1.06641	32904954	GENE_ID=BRCA2	833	0.0115971	0.860752	32904954	GENE_ID=BRCA2	493	0.0138103	1.02501	0.0134733	32904954	32905135	AMPL225306380	Pool=3;
32900497	GENE_ID=BRCA2	1754	0.0206569	1.07691	32900497	GENE_ID=BRCA2	1267	0.0176394	0.919593	32900497	GENE_ID=BRCA2	705	0.019749	1.02958	0.0191817	32900497	32900659	AMPL225451133	Pool=3;
32900212	GENE_ID=BRCA2	1014	0.0119419	0.926851	32900212	GENE_ID=BRCA2	726	0.0101075	0.784474	32900212	GENE_ID=BRCA2	464	0.0129979	1.00881	0.0128844	32900212	32900375	AMPL223512592	Pool=3;
32893271	GENE_ID=BRCA2	1129	0.0132963	0.91612	32893271	GENE_ID=BRCA2	989	0.013769	0.948691	32893271	GENE_ID=BRCA2	464	0.0129979	0.895564	0.0145137	32893271	32893493	AMPL223521074	Pool=3;
		BR1154	BR1154				BR963	BR963				BR1379	BR1379
		84911					71828					35698
															mean DQ	1
															STDEV	0.240795		0.48159	2STDEV
