# Supplementary material for: Identification of novel BRCA1 large genomic rearrangements by a computational algorithm of amplicon-based Next-Generation Sequencing data
Source: PeerJ. 2019 Nov 15;7:e7972. doi: 10.7717/peerj.7972 (PMC6859874; doi:10.7717/peerj.7972)
Supplement: Supplemental Information 3 [file peerj-07-7972-s005.xlsx]

## Sheet: statistical analysis
DQ analysis
				TP	TN	FP	FN				only negative samples	total samples
	Accuracy	0.647059		3	52	30	0				82	85
	Sensitivity	1
	Specificity	0.634146
	NPV	1
IR analysis
				TP	TN	FP	FN				only negative samples	total samples
	Accuracy	0.670588		2	55	27	1				82	85
	Sensitivity	0.666667
	Specificity	0.670732
	NPV	0.982143
