# Supplementary material for: Identification of novel BRCA1 large genomic rearrangements by a computational algorithm of amplicon-based Next-Generation Sequencing data
Source: PeerJ. 2019 Nov 15;7:e7972. doi: 10.7717/peerj.7972 (PMC6859874; doi:10.7717/peerj.7972)
Supplement: Supplemental Information 6 [file peerj-07-7972-s008.xlsx]

## Sheet: foglio 1
			BR1379 (4)		BR1379 (4) vs all				BR1381 (5)		BR1381 (5) vs all				BR1382 (6)		BR1382 (6) vs all
average of normalized amplicon read counts obtained from all samples	contig_srt	attributes	total_reads	amplicon read count normalized on the BRCA1 and BRCA2 total reads	%	?	contig_srt	attributes	total_reads	amplicon read count normalized on the BRCA1 and BRCA2 total reads	%	?	contig_srt	attributes	total_reads	amplicon read count normalized on the BRCA1 and BRCA2 total reads	%	?
0.00330301	41276113	GENE_ID=BRCA1	348	0.00370311	1.12113		41276113	GENE_ID=BRCA1	347	0.00355733	1.077		41276113	GENE_ID=BRCA1	253	0.00264858	0.801868
0.0088481	41276040	GENE_ID=BRCA1	1008	0.0107263	1.21227		41276040	GENE_ID=BRCA1	483	0.00495156	0.559618		41276040	GENE_ID=BRCA1	1038	0.0108665	1.22812
0.00761916	41275974	GENE_ID=BRCA1	512	0.00544826	0.715073		41275974	GENE_ID=BRCA1	1014	0.0103952	1.36435		41275974	GENE_ID=BRCA1	670	0.00701402	0.920576
0.00625443	41267746	GENE_ID=BRCA1	633	0.00673583	1.07697		41267746	GENE_ID=BRCA1	632	0.00647906	1.03592		41267746	GENE_ID=BRCA1	530	0.0055484	0.887115
0.00756262	41267625	GENE_ID=BRCA1	822	0.00874701	1.15661		41267625	GENE_ID=BRCA1	450	0.00461326	0.610008		41267625	GENE_ID=BRCA1	891	0.0093276	1.23338
0.00392366	41258442	GENE_ID=BRCA1	277	0.00294759	0.751235		41258442	GENE_ID=BRCA1	442	0.00453124	1.15485		41258442	GENE_ID=BRCA1	410	0.00429216	1.09392
0.00641891	41256826	GENE_ID=BRCA1	622	0.00661878	1.03114		41256826	GENE_ID=BRCA1	665	0.00681737	1.06208		41256826	GENE_ID=BRCA1	556	0.00582059	0.906787
0.00598337	41256156	GENE_ID=BRCA1	654	0.0069593	1.16311		41256156	GENE_ID=BRCA1	392	0.00401866	0.671638		41256156	GENE_ID=BRCA1	666	0.00697214	1.16525
0.00521545	41256050	GENE_ID=BRCA1	421	0.00447991	0.85897		41256050	GENE_ID=BRCA1	644	0.00660208	1.26587		41256050	GENE_ID=BRCA1	436	0.00456435	0.875159
0.00718781	41251798	GENE_ID=BRCA1	652	0.00693802	0.965247		41251798	GENE_ID=BRCA1	817	0.00837562	1.16525		41251798	GENE_ID=BRCA1	597	0.0062498	0.8695
0.00339389	41251703	GENE_ID=BRCA1	340	0.00361798	1.06603		41251703	GENE_ID=BRCA1	242	0.00248091	0.730992		41251703	GENE_ID=BRCA1	390	0.00408279	1.20298
0.00316643	41249241	GENE_ID=BRCA1	272	0.00289439	0.914084		41249241	GENE_ID=BRCA1	245	0.00251166	0.793214		41249241	GENE_ID=BRCA1	391	0.00409326	1.2927
0.00929332	41247828	GENE_ID=BRCA1	999	0.0106305	1.14388		41247828	GENE_ID=BRCA1	930	0.00953406	1.0259		41247828	GENE_ID=BRCA1	737	0.00771542	0.830211
0.00679976	41246850	GENE_ID=BRCA1	772	0.00821495	1.20812		41246850	GENE_ID=BRCA1	488	0.00500282	0.735734		41246850	GENE_ID=BRCA1	686	0.00718152	1.05614
0.0048604	41246698	GENE_ID=BRCA1	323	0.00343708	0.70716		41246698	GENE_ID=BRCA1	795	0.00815008	1.67683		41246698	GENE_ID=BRCA1	286	0.00299404	0.616007
0.00749156	41246562	GENE_ID=BRCA1	684	0.00727853	0.971564		41246562	GENE_ID=BRCA1	792	0.00811933	1.0838		41246562	GENE_ID=BRCA1	676	0.00707683	0.94464
0.00674178	41246406	GENE_ID=BRCA1	728	0.00774674	1.14906		41246406	GENE_ID=BRCA1	531	0.00544364	0.807449		41246406	GENE_ID=BRCA1	672	0.00703495	1.04349
0.00921697	41246277	GENE_ID=BRCA1	542	0.00576749	0.625747		41246277	GENE_ID=BRCA1	1333	0.0136655	1.48265		41246277	GENE_ID=BRCA1	785	0.00821792	0.891608
0.00557993	41246135	GENE_ID=BRCA1	547	0.0058207	1.04315		41246135	GENE_ID=BRCA1	626	0.00641755	1.15011		41246135	GENE_ID=BRCA1	430	0.00450153	0.806737
0.00743392	41246013	GENE_ID=BRCA1	810	0.00861931	1.15946		41246013	GENE_ID=BRCA1	483	0.00495156	0.666077		41246013	GENE_ID=BRCA1	834	0.00873088	1.17447
0.0111324	41245945	GENE_ID=BRCA1	801	0.00852354	0.765653		41245945	GENE_ID=BRCA1	1399	0.0143421	1.28832		41245945	GENE_ID=BRCA1	1006	0.0105315	0.946024
0.00813155	41245803	GENE_ID=BRCA1	842	0.00895983	1.10186		41245803	GENE_ID=BRCA1	850	0.00871393	1.07162		41245803	GENE_ID=BRCA1	642	0.00672089	0.826521
0.00498417	41245657	GENE_ID=BRCA1	534	0.00568236	1.14008		41245657	GENE_ID=BRCA1	313	0.00320878	0.643794		41245657	GENE_ID=BRCA1	579	0.00606137	1.21612
0.00820613	41245535	GENE_ID=BRCA1	602	0.00640596	0.780631		41245535	GENE_ID=BRCA1	979	0.0100364	1.22304		41245535	GENE_ID=BRCA1	781	0.00817604	0.996333
0.00607854	41245395	GENE_ID=BRCA1	583	0.00620378	1.0206		41245395	GENE_ID=BRCA1	660	0.00676611	1.11311		41245395	GENE_ID=BRCA1	503	0.00526575	0.866284
0.00869088	41245286	GENE_ID=BRCA1	944	0.0100452	1.15583		41245286	GENE_ID=BRCA1	483	0.00495156	0.569742		41245286	GENE_ID=BRCA1	1058	0.0110759	1.27442
0.00534212	41245170	GENE_ID=BRCA1	327	0.00347965	0.651361		41245170	GENE_ID=BRCA1	796	0.00816034	1.52755		41245170	GENE_ID=BRCA1	419	0.00438638	0.821093
0.00931894	41245022	GENE_ID=BRCA1	955	0.0101623	1.0905		41245022	GENE_ID=BRCA1	975	0.00999539	1.07259		41245022	GENE_ID=BRCA1	745	0.00779917	0.836915
0.00338293	41244878	GENE_ID=BRCA1	372	0.0039585	1.17014		41244878	GENE_ID=BRCA1	226	0.00231688	0.684873		41244878	GENE_ID=BRCA1	370	0.00387341	1.14499
0.00667913	41244709	GENE_ID=BRCA1	495	0.00526736	0.788629		41244709	GENE_ID=BRCA1	826	0.00846789	1.26781		41244709	GENE_ID=BRCA1	602	0.00630215	0.943558
0.00879048	41244629	GENE_ID=BRCA1	865	0.00920458	1.04711		41244629	GENE_ID=BRCA1	973	0.00997488	1.13474		41244629	GENE_ID=BRCA1	687	0.00719199	0.818156
0.0039764	41244483	GENE_ID=BRCA1	447	0.00475658	1.1962		41244483	GENE_ID=BRCA1	234	0.00239889	0.603283		41244483	GENE_ID=BRCA1	456	0.00477372	1.20051
0.00675065	41244323	GENE_ID=BRCA1	454	0.00483107	0.715645		41244323	GENE_ID=BRCA1	866	0.00887795	1.31513		41244323	GENE_ID=BRCA1	625	0.00654293	0.969229
0.00878928	41244258	GENE_ID=BRCA1	934	0.00993881	1.13079		41244258	GENE_ID=BRCA1	948	0.00971859	1.10573		41244258	GENE_ID=BRCA1	641	0.00671043	0.763479
0.00432171	41244100	GENE_ID=BRCA1	511	0.00543762	1.25821		41244100	GENE_ID=BRCA1	287	0.00294223	0.680803		41244100	GENE_ID=BRCA1	438	0.00458528	1.06099
0.00627222	41243946	GENE_ID=BRCA1	386	0.00410748	0.654868		41243946	GENE_ID=BRCA1	817	0.00837562	1.33535		41243946	GENE_ID=BRCA1	605	0.00633355	1.00978
0.00760002	41243808	GENE_ID=BRCA1	747	0.00794892	1.04591		41243808	GENE_ID=BRCA1	790	0.00809883	1.06563		41243808	GENE_ID=BRCA1	645	0.0067523	0.888459
0.00667964	41243639	GENE_ID=BRCA1	696	0.00740623	1.10878		41243639	GENE_ID=BRCA1	448	0.00459275	0.687575		41243639	GENE_ID=BRCA1	768	0.00803995	1.20365
0.00584326	41243471	GENE_ID=BRCA1	421	0.00447991	0.766681		41243471	GENE_ID=BRCA1	600	0.00615101	1.05267		41243471	GENE_ID=BRCA1	659	0.00689886	1.18065
0.00775973	41243322	GENE_ID=BRCA1	805	0.00856611	1.10392		41243322	GENE_ID=BRCA1	799	0.00819109	1.05559		41243322	GENE_ID=BRCA1	623	0.00652199	0.840492
0.00745936	41242918	GENE_ID=BRCA1	811	0.00862995	1.15693		41242918	GENE_ID=BRCA1	518	0.00531037	0.711907		41242918	GENE_ID=BRCA1	806	0.00843776	1.13116
0.00329533	41234528	GENE_ID=BRCA1	228	0.00242618	0.736247		41234528	GENE_ID=BRCA1	406	0.00416218	1.26305		41234528	GENE_ID=BRCA1	315	0.00329764	1.0007
0.00916759	41234356	GENE_ID=BRCA1	967	0.01029	1.12243		41234356	GENE_ID=BRCA1	906	0.00928802	1.01314		41234356	GENE_ID=BRCA1	757	0.00792479	0.864435
0.0043143	41231265	GENE_ID=BRCA1	450	0.00478851	1.10992		41231265	GENE_ID=BRCA1	341	0.00349582	0.810288		41231265	GENE_ID=BRCA1	445	0.00465856	1.0798
0.00928633	41228577	GENE_ID=BRCA1	617	0.00656558	0.707015		41228577	GENE_ID=BRCA1	1302	0.0133477	1.43735		41228577	GENE_ID=BRCA1	759	0.00794573	0.855637
0.00617014	41228420	GENE_ID=BRCA1	649	0.00690609	1.11928		41228420	GENE_ID=BRCA1	604	0.00619201	1.00355		41228420	GENE_ID=BRCA1	517	0.00541231	0.877178
0.00920014	41226417	GENE_ID=BRCA1	1087	0.0115669	1.25725		41226417	GENE_ID=BRCA1	455	0.00466451	0.507005		41226417	GENE_ID=BRCA1	1086	0.011369	1.23574
0.0114926	41226336	GENE_ID=BRCA1	841	0.00894919	0.778689		41226336	GENE_ID=BRCA1	1564	0.0160336	1.39512		41226336	GENE_ID=BRCA1	907	0.0094951	0.826189
0.00654858	41223148	GENE_ID=BRCA1	421	0.00447991	0.684104		41223148	GENE_ID=BRCA1	787	0.00806807	1.23203		41223148	GENE_ID=BRCA1	678	0.00709777	1.08386
0.00652303	41223017	GENE_ID=BRCA1	501	0.00533121	0.81729		41223017	GENE_ID=BRCA1	432	0.00442873	0.678937		41223017	GENE_ID=BRCA1	937	0.00980916	1.50377
0.00273215	41222948	GENE_ID=BRCA1	98	0.00104283	0.381689		41222948	GENE_ID=BRCA1	418	0.0042852	1.56844		41222948	GENE_ID=BRCA1	274	0.00286842	1.04988
0.00926217	41222877	GENE_ID=BRCA1	588	0.00625698	0.675542		41222877	GENE_ID=BRCA1	1227	0.0125788	1.35808		41222877	GENE_ID=BRCA1	855	0.00895072	0.966374
0.00405749	41219589	GENE_ID=BRCA1	323	0.00343708	0.847097		41219589	GENE_ID=BRCA1	317	0.00324978	0.800935		41219589	GENE_ID=BRCA1	524	0.00548559	1.35197
0.00428579	41215856	GENE_ID=BRCA1	362	0.00385209	0.898805		41215856	GENE_ID=BRCA1	424	0.00434671	1.01422		41215856	GENE_ID=BRCA1	445	0.00465856	1.08698
0.00474146	41215278	GENE_ID=BRCA1	502	0.00534185	1.12663		41215278	GENE_ID=BRCA1	459	0.00470552	0.992421		41215278	GENE_ID=BRCA1	399	0.004177	0.880954
0.00880636	41209003	GENE_ID=BRCA1	875	0.00931099	1.0573		41209003	GENE_ID=BRCA1	665	0.00681737	0.774142		41209003	GENE_ID=BRCA1	983	0.0102907	1.16856
0.00472934	41203084	GENE_ID=BRCA1	377	0.00401171	0.84826		41203084	GENE_ID=BRCA1	479	0.00491055	1.03832		41203084	GENE_ID=BRCA1	503	0.00526575	1.11342
0.00569435	41202931	GENE_ID=BRCA1	566	0.00602288	1.05769		41202931	GENE_ID=BRCA1	603	0.00618176	1.0856		41202931	GENE_ID=BRCA1	466	0.00487841	0.85671
0.00817522	41201075	GENE_ID=BRCA1	902	0.0095983	1.17407		41201075	GENE_ID=BRCA1	487	0.00499257	0.610696		41201075	GENE_ID=BRCA1	949	0.00993478	1.21523
0.0147859	41199644	GENE_ID=BRCA1	1135	0.0120777	0.816836		41199644	GENE_ID=BRCA1	1906	0.0195397	1.32151		41199644	GENE_ID=BRCA1	1217	0.0127404	0.861657
0.0097338	41199641	GENE_ID=BRCA1	926	0.00985368	1.01232		41199641	GENE_ID=BRCA1	1054	0.0108053	1.11008		41199641	GENE_ID=BRCA1	816	0.00854245	0.877606
0.0127519	41197743	GENE_ID=BRCA1	1470	0.0156425	1.22668		41197743	GENE_ID=BRCA1	575	0.00589472	0.462262		41197743	GENE_ID=BRCA1	1597	0.0167185	1.31106
0.0118517	41197603	GENE_ID=BRCA1	627	0.00667199	0.562957		41197603	GENE_ID=BRCA1	1785	0.0182992	1.54402		41197603	GENE_ID=BRCA1	1011	0.0105838	0.893024
0.00571807	32972809	GENE_ID=BRCA2	616	0.00655493	1.14635		32972809	GENE_ID=BRCA2	556	0.00569993	0.996828		32972809	GENE_ID=BRCA2	468	0.00489934	0.856818
0.00848899	32972688	GENE_ID=BRCA2	992	0.010556	1.24349		32972688	GENE_ID=BRCA2	466	0.00477728	0.562762		32972688	GENE_ID=BRCA2	968	0.0101337	1.19374
0.0045014	32972534	GENE_ID=BRCA2	336	0.00357542	0.79429		32972534	GENE_ID=BRCA2	510	0.00522836	1.16149		32972534	GENE_ID=BRCA2	449	0.00470044	1.04422
0.00877116	32972377	GENE_ID=BRCA2	866	0.00921522	1.05063		32972377	GENE_ID=BRCA2	855	0.00876519	0.999319		32972377	GENE_ID=BRCA2	796	0.00833307	0.950054
0.00390086	32972201	GENE_ID=BRCA2	426	0.00453312	1.16208		32972201	GENE_ID=BRCA2	345	0.00353683	0.906679		32972201	GENE_ID=BRCA2	347	0.00363263	0.931239
0.00522349	32971071	GENE_ID=BRCA2	315	0.00335196	0.641708		32971071	GENE_ID=BRCA2	738	0.00756574	1.44841		32971071	GENE_ID=BRCA2	454	0.00475278	0.909886
0.00419695	32970902	GENE_ID=BRCA2	415	0.00441607	1.05221		32970902	GENE_ID=BRCA2	440	0.00451074	1.07477		32970902	GENE_ID=BRCA2	350	0.00366404	0.873025
0.00583368	32968978	GENE_ID=BRCA2	649	0.00690609	1.18383		32968978	GENE_ID=BRCA2	383	0.00392639	0.673056		32968978	GENE_ID=BRCA2	637	0.00666855	1.14311
0.00516453	32968840	GENE_ID=BRCA2	342	0.00363927	0.704666		32968840	GENE_ID=BRCA2	658	0.0067456	1.30614		32968840	GENE_ID=BRCA2	488	0.00510872	0.989193
0.0042628	32968693	GENE_ID=BRCA2	421	0.00447991	1.05093		32968693	GENE_ID=BRCA2	451	0.00462351	1.08462		32968693	GENE_ID=BRCA2	352	0.00368498	0.86445
0.00557728	32954203	GENE_ID=BRCA2	600	0.00638468	1.14477		32954203	GENE_ID=BRCA2	367	0.00376237	0.674588		32954203	GENE_ID=BRCA2	629	0.0065848	1.18065
0.00594403	32954056	GENE_ID=BRCA2	491	0.00522479	0.878998		32954056	GENE_ID=BRCA2	565	0.0057922	0.974456		32954056	GENE_ID=BRCA2	651	0.00681511	1.14655
0.000541773	32954024	GENE_ID=BRCA2	30	0.000319234	0.589239		32954024	GENE_ID=BRCA2	108	0.00110718	2.04362		32954024	GENE_ID=BRCA2	19	0.000198905	0.367137
0.00438047	32953881	GENE_ID=BRCA2	481	0.00511838	1.16846		32953881	GENE_ID=BRCA2	271	0.0027782	0.634226		32953881	GENE_ID=BRCA2	501	0.00524481	1.19732
0.00398508	32953584	GENE_ID=BRCA2	397	0.00422453	1.06009		32953584	GENE_ID=BRCA2	412	0.00422369	1.05988		32953584	GENE_ID=BRCA2	335	0.00350701	0.880036
0.0097822	32953471	GENE_ID=BRCA2	1107	0.0117797	1.2042		32953471	GENE_ID=BRCA2	577	0.00591522	0.604692		32953471	GENE_ID=BRCA2	1113	0.0116516	1.19111
0.00385763	32953316	GENE_ID=BRCA2	302	0.00321362	0.833057		32953316	GENE_ID=BRCA2	410	0.00420319	1.08958		32953316	GENE_ID=BRCA2	397	0.00415607	1.07736
0.0110225	32950844	GENE_ID=BRCA2	1070	0.011386	1.03298		32950844	GENE_ID=BRCA2	1202	0.0123225	1.11794		32950844	GENE_ID=BRCA2	894	0.009359	0.849081
0.00735772	32950739	GENE_ID=BRCA2	851	0.0090556	1.23076		32950739	GENE_ID=BRCA2	363	0.00372136	0.505776		32950739	GENE_ID=BRCA2	888	0.00929619	1.26346
0.00108383	32945202	GENE_ID=BRCA2	97	0.00103219	0.952353		32945202	GENE_ID=BRCA2	145	0.00148649	1.37152		32945202	GENE_ID=BRCA2	70	0.000732808	0.676128
0.000640346	32945049	GENE_ID=BRCA2	68	0.000723597	1.13001		32945049	GENE_ID=BRCA2	78	0.000799631	1.24875		32945049	GENE_ID=BRCA2	38	0.00039781	0.621242
0.0050974	32944566	GENE_ID=BRCA2	539	0.00573557	1.12519		32944566	GENE_ID=BRCA2	440	0.00451074	0.884909		32944566	GENE_ID=BRCA2	482	0.00504591	0.989897
0.00362775	32944476	GENE_ID=BRCA2	219	0.00233041	0.642384		32944476	GENE_ID=BRCA2	531	0.00544364	1.50056		32944476	GENE_ID=BRCA2	297	0.0031092	0.85706
0.00413776	32937669	GENE_ID=BRCA2	401	0.00426709	1.03126		32937669	GENE_ID=BRCA2	427	0.00437747	1.05793		32937669	GENE_ID=BRCA2	360	0.00376873	0.910813
0.00504643	32937551	GENE_ID=BRCA2	583	0.00620378	1.22934		32937551	GENE_ID=BRCA2	263	0.00269619	0.534277		32937551	GENE_ID=BRCA2	596	0.00623934	1.23638
0.00370265	32937396	GENE_ID=BRCA2	227	0.00241554	0.652381		32937396	GENE_ID=BRCA2	515	0.00527961	1.4259		32937396	GENE_ID=BRCA2	326	0.00341279	0.921716
0.00881064	32937281	GENE_ID=BRCA2	892	0.00949189	1.07732		32937281	GENE_ID=BRCA2	957	0.00981086	1.11352		32937281	GENE_ID=BRCA2	681	0.00712917	0.809155
0.00526797	32936704	GENE_ID=BRCA2	626	0.00666135	1.2645		32936704	GENE_ID=BRCA2	322	0.00330104	0.626625		32936704	GENE_ID=BRCA2	558	0.00584153	1.10888
0.0057126	32936625	GENE_ID=BRCA2	364	0.00387337	0.678039		32936625	GENE_ID=BRCA2	769	0.00788354	1.38003		32936625	GENE_ID=BRCA2	514	0.0053809	0.941935
0.00853989	32931954	GENE_ID=BRCA2	883	0.00939612	1.10026		32931954	GENE_ID=BRCA2	930	0.00953406	1.11642		32931954	GENE_ID=BRCA2	639	0.00668949	0.783323
0.00842755	32931882	GENE_ID=BRCA2	996	0.0105986	1.25761		32931882	GENE_ID=BRCA2	402	0.00412117	0.489012		32931882	GENE_ID=BRCA2	1009	0.0105629	1.25338
0.0037366	32931801	GENE_ID=BRCA2	333	0.0035435	0.94832		32931801	GENE_ID=BRCA2	371	0.00380337	1.01787		32931801	GENE_ID=BRCA2	369	0.00386294	1.03381
0.00909658	32930743	GENE_ID=BRCA2	912	0.00970471	1.06685		32930743	GENE_ID=BRCA2	1024	0.0104977	1.15403		32930743	GENE_ID=BRCA2	677	0.0070873	0.779117
0.00850395	32930604	GENE_ID=BRCA2	979	0.0104177	1.22504		32930604	GENE_ID=BRCA2	490	0.00502332	0.590704		32930604	GENE_ID=BRCA2	962	0.0100709	1.18426
0.00112327	32930410	GENE_ID=BRCA2	98	0.00104283	0.92839		32930410	GENE_ID=BRCA2	83	0.000850889	0.757512		32930410	GENE_ID=BRCA2	141	0.00147608	1.3141
0.00386201	32929223	GENE_ID=BRCA2	377	0.00401171	1.03876		32929223	GENE_ID=BRCA2	409	0.00419294	1.08569		32929223	GENE_ID=BRCA2	323	0.00338138	0.875551
0.00462998	32929068	GENE_ID=BRCA2	505	0.00537377	1.16065		32929068	GENE_ID=BRCA2	314	0.00321903	0.695257		32929068	GENE_ID=BRCA2	506	0.00529715	1.1441
0.00304765	32928914	GENE_ID=BRCA2	217	0.00230912	0.757675		32928914	GENE_ID=BRCA2	348	0.00356758	1.1706		32928914	GENE_ID=BRCA2	312	0.00326623	1.07172
0.00747361	32920982	GENE_ID=BRCA2	761	0.0080979	1.08353		32920982	GENE_ID=BRCA2	812	0.00832436	1.11383		32920982	GENE_ID=BRCA2	573	0.00599856	0.802632
0.00401227	32920865	GENE_ID=BRCA2	520	0.00553339	1.37912		32920865	GENE_ID=BRCA2	182	0.00186581	0.465025		32920865	GENE_ID=BRCA2	443	0.00463763	1.15586
0.000917628	32918626	GENE_ID=BRCA2	95	0.00101091	1.10165		32918626	GENE_ID=BRCA2	29	0.000297299	0.323986		32918626	GENE_ID=BRCA2	138	0.00144468	1.57436
0.0100992	32915285	GENE_ID=BRCA2	1059	0.011269	1.11583		32915285	GENE_ID=BRCA2	1029	0.010549	1.04454		32915285	GENE_ID=BRCA2	810	0.00847963	0.839635
0.00493129	32915186	GENE_ID=BRCA2	564	0.0060016	1.21704		32915186	GENE_ID=BRCA2	296	0.0030345	0.615356		32915186	GENE_ID=BRCA2	550	0.00575778	1.1676
0.00369435	32915034	GENE_ID=BRCA2	284	0.00302208	0.818027		32915034	GENE_ID=BRCA2	289	0.00296274	0.801963		32915034	GENE_ID=BRCA2	487	0.00509825	1.38001
0.00541142	32914877	GENE_ID=BRCA2	526	0.00559723	1.03434		32914877	GENE_ID=BRCA2	575	0.00589472	1.08931		32914877	GENE_ID=BRCA2	453	0.00474231	0.876353
0.00465005	32914740	GENE_ID=BRCA2	505	0.00537377	1.15564		32914740	GENE_ID=BRCA2	326	0.00334205	0.718712		32914740	GENE_ID=BRCA2	500	0.00523434	1.12565
0.00996794	32914665	GENE_ID=BRCA2	648	0.00689545	0.691763		32914665	GENE_ID=BRCA2	1359	0.013932	1.39768		32914665	GENE_ID=BRCA2	867	0.00907635	0.910554
0.00518514	32914500	GENE_ID=BRCA2	524	0.00557595	1.07537		32914500	GENE_ID=BRCA2	566	0.00580245	1.11905		32914500	GENE_ID=BRCA2	399	0.004177	0.805573
0.0073455	32914403	GENE_ID=BRCA2	874	0.00930035	1.26613		32914403	GENE_ID=BRCA2	309	0.00316777	0.431253		32914403	GENE_ID=BRCA2	914	0.00956838	1.30262
0.00904394	32914318	GENE_ID=BRCA2	583	0.00620378	0.68596		32914318	GENE_ID=BRCA2	1249	0.0128043	1.41579		32914318	GENE_ID=BRCA2	776	0.0081237	0.898248
0.00391298	32914173	GENE_ID=BRCA2	443	0.00471402	1.20471		32914173	GENE_ID=BRCA2	384	0.00393664	1.00605		32914173	GENE_ID=BRCA2	295	0.00308826	0.789236
0.0060555	32914026	GENE_ID=BRCA2	658	0.00700186	1.15628		32914026	GENE_ID=BRCA2	411	0.00421344	0.695804		32914026	GENE_ID=BRCA2	664	0.00695121	1.14792
0.00775167	32913899	GENE_ID=BRCA2	457	0.004863	0.627348		32913899	GENE_ID=BRCA2	1068	0.0109488	1.41244		32913899	GENE_ID=BRCA2	711	0.00744323	0.96021
0.0061803	32913762	GENE_ID=BRCA2	665	0.00707635	1.14499		32913762	GENE_ID=BRCA2	621	0.00636629	1.03009		32913762	GENE_ID=BRCA2	487	0.00509825	0.82492
0.00233417	32913556	GENE_ID=BRCA2	251	0.00267092	1.14427		32913556	GENE_ID=BRCA2	156	0.00159926	0.685152		32913556	GENE_ID=BRCA2	261	0.00273233	1.17058
0.00774072	32913468	GENE_ID=BRCA2	424	0.00451184	0.582871		32913468	GENE_ID=BRCA2	1145	0.0117382	1.51642		32913468	GENE_ID=BRCA2	666	0.00697214	0.90071
0.00646556	32913326	GENE_ID=BRCA2	638	0.00678904	1.05003		32913326	GENE_ID=BRCA2	660	0.00676611	1.04648		32913326	GENE_ID=BRCA2	558	0.00584153	0.903484
0.00465218	32913282	GENE_ID=BRCA2	541	0.00575685	1.23745		32913282	GENE_ID=BRCA2	277	0.00283972	0.610406		32913282	GENE_ID=BRCA2	512	0.00535997	1.15214
0.00426039	32913170	GENE_ID=BRCA2	287	0.003054	0.716836		32913170	GENE_ID=BRCA2	619	0.00634579	1.48948		32913170	GENE_ID=BRCA2	323	0.00338138	0.793679
0.00621724	32913092	GENE_ID=BRCA2	679	0.00722533	1.16214		32913092	GENE_ID=BRCA2	652	0.00668409	1.07509		32913092	GENE_ID=BRCA2	453	0.00474231	0.762768
0.0063535	32912987	GENE_ID=BRCA2	677	0.00720404	1.13387		32912987	GENE_ID=BRCA2	407	0.00417243	0.656714		32912987	GENE_ID=BRCA2	734	0.00768401	1.20941
0.0031647	32912830	GENE_ID=BRCA2	277	0.00294759	0.931398		32912830	GENE_ID=BRCA2	273	0.00279871	0.884353		32912830	GENE_ID=BRCA2	358	0.00374779	1.18425
0.00613637	32912744	GENE_ID=BRCA2	624	0.00664006	1.08208		32912744	GENE_ID=BRCA2	665	0.00681737	1.11098		32912744	GENE_ID=BRCA2	473	0.00495169	0.80694
0.00701284	32912642	GENE_ID=BRCA2	860	0.00915137	1.30494		32912642	GENE_ID=BRCA2	362	0.00371111	0.529188		32912642	GENE_ID=BRCA2	781	0.00817604	1.16587
0.00368959	32912492	GENE_ID=BRCA2	282	0.0030008	0.813314		32912492	GENE_ID=BRCA2	305	0.00312676	0.847454		32912492	GENE_ID=BRCA2	472	0.00494122	1.33923
0.00337379	32912369	GENE_ID=BRCA2	359	0.00382016	1.13231		32912369	GENE_ID=BRCA2	342	0.00350607	1.03921		32912369	GENE_ID=BRCA2	267	0.00279514	0.828486
0.00194851	32912221	GENE_ID=BRCA2	235	0.00250067	1.28337		32912221	GENE_ID=BRCA2	120	0.0012302	0.631354		32912221	GENE_ID=BRCA2	202	0.00211467	1.08528
0.00814322	32912112	GENE_ID=BRCA2	504	0.00536313	0.658601		32912112	GENE_ID=BRCA2	1192	0.01222	1.50064		32912112	GENE_ID=BRCA2	654	0.00684652	0.840763
0.00670815	32911942	GENE_ID=BRCA2	677	0.00720404	1.07392		32911942	GENE_ID=BRCA2	666	0.00682762	1.01781		32911942	GENE_ID=BRCA2	582	0.00609277	0.908265
0.00529315	32911783	GENE_ID=BRCA2	614	0.00653365	1.23436		32911783	GENE_ID=BRCA2	302	0.00309601	0.584908		32911783	GENE_ID=BRCA2	597	0.0062498	1.18073
0.00163032	32911558	GENE_ID=BRCA2	171	0.00181963	1.11612		32911558	GENE_ID=BRCA2	78	0.000799631	0.490474		32911558	GENE_ID=BRCA2	217	0.0022717	1.39341
0.00822402	32911487	GENE_ID=BRCA2	850	0.00904496	1.09982		32911487	GENE_ID=BRCA2	784	0.00803732	0.977297		32911487	GENE_ID=BRCA2	725	0.0075898	0.922881
0.00473196	32911328	GENE_ID=BRCA2	507	0.00539505	1.14013		32911328	GENE_ID=BRCA2	353	0.00361884	0.764765		32911328	GENE_ID=BRCA2	495	0.005182	1.09511
0.00799079	32911239	GENE_ID=BRCA2	492	0.00523543	0.655183		32911239	GENE_ID=BRCA2	1167	0.0119637	1.49719		32911239	GENE_ID=BRCA2	647	0.00677324	0.84763
0.00812251	32911145	GENE_ID=BRCA2	826	0.00878957	1.08212		32911145	GENE_ID=BRCA2	914	0.00937003	1.15359		32911145	GENE_ID=BRCA2	593	0.00620793	0.764287
0.00524653	32911006	GENE_ID=BRCA2	606	0.00644852	1.2291		32911006	GENE_ID=BRCA2	313	0.00320878	0.611599		32911006	GENE_ID=BRCA2	581	0.0060823	1.1593
0.00399941	32910962	GENE_ID=BRCA2	328	0.00349029	0.872702		32910962	GENE_ID=BRCA2	352	0.00360859	0.902281		32910962	GENE_ID=BRCA2	468	0.00489934	1.22502
0.00722128	32910799	GENE_ID=BRCA2	773	0.00822559	1.13908		32910799	GENE_ID=BRCA2	740	0.00758624	1.05054		32910799	GENE_ID=BRCA2	559	0.00585199	0.810382
0.00496415	32910628	GENE_ID=BRCA2	571	0.00607608	1.22399		32910628	GENE_ID=BRCA2	378	0.00387513	0.780625		32910628	GENE_ID=BRCA2	472	0.00494122	0.995381
0.00529956	32910478	GENE_ID=BRCA2	309	0.00328811	0.62045		32910478	GENE_ID=BRCA2	743	0.007617	1.43729		32910478	GENE_ID=BRCA2	477	0.00499356	0.94226
0.00673699	32910325	GENE_ID=BRCA2	669	0.00711891	1.05669		32910325	GENE_ID=BRCA2	695	0.00712492	1.05758		32910325	GENE_ID=BRCA2	570	0.00596715	0.885729
0.00448455	32907510	GENE_ID=BRCA2	456	0.00485235	1.08202		32907510	GENE_ID=BRCA2	356	0.0036496	0.813816		32907510	GENE_ID=BRCA2	473	0.00495169	1.10417
0.00326038	32907354	GENE_ID=BRCA2	304	0.0032349	0.992187		32907354	GENE_ID=BRCA2	226	0.00231688	0.710617		32907354	GENE_ID=BRCA2	404	0.00422935	1.2972
0.00374322	32907270	GENE_ID=BRCA2	348	0.00370311	0.989286		32907270	GENE_ID=BRCA2	388	0.00397765	1.06263		32907270	GENE_ID=BRCA2	339	0.00354888	0.948084
0.00573773	32907126	GENE_ID=BRCA2	629	0.00669327	1.16654		32907126	GENE_ID=BRCA2	391	0.00400841	0.698605		32907126	GENE_ID=BRCA2	622	0.00651152	1.13486
0.00657378	32906979	GENE_ID=BRCA2	447	0.00475658	0.723569		32906979	GENE_ID=BRCA2	797	0.00817059	1.24291		32906979	GENE_ID=BRCA2	649	0.00679418	1.03353
0.00675584	32906844	GENE_ID=BRCA2	692	0.00736366	1.08997		32906844	GENE_ID=BRCA2	694	0.00711467	1.05311		32906844	GENE_ID=BRCA2	553	0.00578918	0.856916
0.00723416	32906761	GENE_ID=BRCA2	825	0.00877893	1.21354		32906761	GENE_ID=BRCA2	362	0.00371111	0.512998		32906761	GENE_ID=BRCA2	880	0.00921244	1.27346
0.00517262	32906649	GENE_ID=BRCA2	355	0.0037776	0.730307		32906649	GENE_ID=BRCA2	653	0.00669435	1.29419		32906649	GENE_ID=BRCA2	482	0.00504591	0.975503
0.00294568	32906432	GENE_ID=BRCA2	276	0.00293695	0.997036		32906432	GENE_ID=BRCA2	309	0.00316777	1.07539		32906432	GENE_ID=BRCA2	261	0.00273233	0.92757
0.00439061	32906268	GENE_ID=BRCA2	455	0.00484171	1.10274		32906268	GENE_ID=BRCA2	303	0.00310626	0.707477		32906268	GENE_ID=BRCA2	499	0.00522387	1.18978
0.00235935	32905132	GENE_ID=BRCA2	161	0.00171322	0.72614		32905132	GENE_ID=BRCA2	267	0.0027372	1.16015		32905132	GENE_ID=BRCA2	251	0.00262764	1.11371
0.00459657	32904954	GENE_ID=BRCA2	493	0.00524608	1.1413		32904954	GENE_ID=BRCA2	477	0.00489005	1.06385		32904954	GENE_ID=BRCA2	349	0.00365357	0.794848
0.00177496	32903521	GENE_ID=BRCA2	208	0.00221335	1.24699		32903521	GENE_ID=BRCA2	134	0.00137372	0.773947		32903521	GENE_ID=BRCA2	166	0.0017378	0.979065
0.00795607	32900654	GENE_ID=BRCA2	466	0.00495877	0.623268		32900654	GENE_ID=BRCA2	1144	0.0117279	1.47409		32900654	GENE_ID=BRCA2	686	0.00718152	0.902646
0.00705357	32900497	GENE_ID=BRCA2	705	0.007502	1.06357		32900497	GENE_ID=BRCA2	737	0.00755549	1.07116		32900497	GENE_ID=BRCA2	583	0.00610324	0.865269
0.0103765	32900398	GENE_ID=BRCA2	1258	0.0133865	1.29008		32900398	GENE_ID=BRCA2	585	0.00599723	0.57796		32900398	GENE_ID=BRCA2	1122	0.0117459	1.13196
0.00250362	32900295	GENE_ID=BRCA2	146	0.0015536	0.620543		32900295	GENE_ID=BRCA2	335	0.00343431	1.37174		32900295	GENE_ID=BRCA2	241	0.00252295	1.00772
0.00435265	32900212	GENE_ID=BRCA2	464	0.00493748	1.13436		32900212	GENE_ID=BRCA2	449	0.004603	1.05752		32900212	GENE_ID=BRCA2	336	0.00351748	0.808122
0.00314059	32899235	GENE_ID=BRCA2	369	0.00392658	1.25027		32899235	GENE_ID=BRCA2	197	0.00201958	0.643058		32899235	GENE_ID=BRCA2	332	0.0034756	1.10667
0.00465522	32899095	GENE_ID=BRCA2	283	0.00301144	0.646895		32899095	GENE_ID=BRCA2	657	0.00673535	1.44684		32899095	GENE_ID=BRCA2	403	0.00421888	0.906268
0.00500755	32893271	GENE_ID=BRCA2	464	0.00493748	0.986007		32893271	GENE_ID=BRCA2	513	0.00525911	1.05024		32893271	GENE_ID=BRCA2	461	0.00482606	0.963757
0.00534419	32893189	GENE_ID=BRCA2	656	0.00698058	1.3062		32893189	GENE_ID=BRCA2	257	0.00263468	0.492999		32893189	GENE_ID=BRCA2	613	0.0064173	1.2008
0.00359097	32890544	GENE_ID=BRCA2	285	0.00303272	0.84454		32890544	GENE_ID=BRCA2	320	0.00328054	0.913551		32890544	GENE_ID=BRCA2	426	0.00445966	1.24191
			93975						97545						95523

## Sheet: matrix_DQ
BR1379 (4) vs all	BR1381 (5) vs all	BR1382 (6) vs all
%	%	%
1.12113	1.077	0.801868
1.21227	0.559618	1.22812
0.715073	1.36435	0.920576
1.07697	1.03592	0.887115
1.15661	0.610008	1.23338
0.751235	1.15485	1.09392
1.03114	1.06208	0.906787
1.16311	0.671638	1.16525
0.85897	1.26587	0.875159
0.965247	1.16525	0.8695
1.06603	0.730992	1.20298
0.914084	0.793214	1.2927
1.14388	1.0259	0.830211
1.20812	0.735734	1.05614
0.70716	1.67683	0.616007
0.971564	1.0838	0.94464
1.14906	0.807449	1.04349
0.625747	1.48265	0.891608
1.04315	1.15011	0.806737
1.15946	0.666077	1.17447
0.765653	1.28832	0.946024
1.10186	1.07162	0.826521
1.14008	0.643794	1.21612
0.780631	1.22304	0.996333
1.0206	1.11311	0.866284
1.15583	0.569742	1.27442
0.651361	1.52755	0.821093
1.0905	1.07259	0.836915
1.17014	0.684873	1.14499
0.788629	1.26781	0.943558
1.04711	1.13474	0.818156
1.1962	0.603283	1.20051
0.715645	1.31513	0.969229
1.13079	1.10573	0.763479
1.25821	0.680803	1.06099
0.654868	1.33535	1.00978
1.04591	1.06563	0.888459
1.10878	0.687575	1.20365
0.766681	1.05267	1.18065
1.10392	1.05559	0.840492
1.15693	0.711907	1.13116
0.736247	1.26305	1.0007
1.12243	1.01314	0.864435
1.10992	0.810288	1.0798
0.707015	1.43735	0.855637
1.11928	1.00355	0.877178
1.25725	0.507005	1.23574
0.778689	1.39512	0.826189
0.684104	1.23203	1.08386
0.81729	0.678937	1.50377
0.381689	1.56844	1.04988
0.675542	1.35808	0.966374
0.847097	0.800935	1.35197
0.898805	1.01422	1.08698
1.12663	0.992421	0.880954
1.0573	0.774142	1.16856
0.84826	1.03832	1.11342
1.05769	1.0856	0.85671
1.17407	0.610696	1.21523
0.816836	1.32151	0.861657
1.01232	1.11008	0.877606
1.22668	0.462262	1.31106
0.562957	1.54402	0.893024
1.14635	0.996828	0.856818
1.24349	0.562762	1.19374
0.79429	1.16149	1.04422
1.05063	0.999319	0.950054
1.16208	0.906679	0.931239
0.641708	1.44841	0.909886
1.05221	1.07477	0.873025
1.18383	0.673056	1.14311
0.704666	1.30614	0.989193
1.05093	1.08462	0.86445
1.14477	0.674588	1.18065
0.878998	0.974456	1.14655
0.589239	2.04362	0.367137
1.16846	0.634226	1.19732
1.06009	1.05988	0.880036
1.2042	0.604692	1.19111
0.833057	1.08958	1.07736
1.03298	1.11794	0.849081
1.23076	0.505776	1.26346
0.952353	1.37152	0.676128
1.13001	1.24875	0.621242
1.12519	0.884909	0.989897
0.642384	1.50056	0.85706
1.03126	1.05793	0.910813
1.22934	0.534277	1.23638
0.652381	1.4259	0.921716
1.07732	1.11352	0.809155
1.2645	0.626625	1.10888
0.678039	1.38003	0.941935
1.10026	1.11642	0.783323
1.25761	0.489012	1.25338
0.94832	1.01787	1.03381
1.06685	1.15403	0.779117
1.22504	0.590704	1.18426
0.92839	0.757512	1.3141
1.03876	1.08569	0.875551
1.16065	0.695257	1.1441
0.757675	1.1706	1.07172
1.08353	1.11383	0.802632
1.37912	0.465025	1.15586
1.10165	0.323986	1.57436
1.11583	1.04454	0.839635
1.21704	0.615356	1.1676
0.818027	0.801963	1.38001
1.03434	1.08931	0.876353
1.15564	0.718712	1.12565
0.691763	1.39768	0.910554
1.07537	1.11905	0.805573
1.26613	0.431253	1.30262
0.68596	1.41579	0.898248
1.20471	1.00605	0.789236
1.15628	0.695804	1.14792
0.627348	1.41244	0.96021
1.14499	1.03009	0.82492
1.14427	0.685152	1.17058
0.582871	1.51642	0.90071
1.05003	1.04648	0.903484
1.23745	0.610406	1.15214
0.716836	1.48948	0.793679
1.16214	1.07509	0.762768
1.13387	0.656714	1.20941
0.931398	0.884353	1.18425
1.08208	1.11098	0.80694
1.30494	0.529188	1.16587
0.813314	0.847454	1.33923
1.13231	1.03921	0.828486
1.28337	0.631354	1.08528
0.658601	1.50064	0.840763
1.07392	1.01781	0.908265
1.23436	0.584908	1.18073
1.11612	0.490474	1.39341
1.09982	0.977297	0.922881
1.14013	0.764765	1.09511
0.655183	1.49719	0.84763
1.08212	1.15359	0.764287
1.2291	0.611599	1.1593
0.872702	0.902281	1.22502
1.13908	1.05054	0.810382
1.22399	0.780625	0.995381
0.62045	1.43729	0.94226
1.05669	1.05758	0.885729
1.08202	0.813816	1.10417
0.992187	0.710617	1.2972
0.989286	1.06263	0.948084
1.16654	0.698605	1.13486
0.723569	1.24291	1.03353
1.08997	1.05311	0.856916
1.21354	0.512998	1.27346
0.730307	1.29419	0.975503
0.997036	1.07539	0.92757
1.10274	0.707477	1.18978
0.72614	1.16015	1.11371
1.1413	1.06385	0.794848
1.24699	0.773947	0.979065
0.623268	1.47409	0.902646
1.06357	1.07116	0.865269
1.29008	0.57796	1.13196
0.620543	1.37174	1.00772
1.13436	1.05752	0.808122
1.25027	0.643058	1.10667
0.646895	1.44684	0.906268
0.986007	1.05024	0.963757
1.3062	0.492999	1.2008
0.84454	0.913551	1.24191

## Sheet: mean_stdev_DQ
mean DQ	1
STDEV	0.243152		0.486303	2STDEV
