# Supplementary material for: Identification of novel BRCA1 large genomic rearrangements by a computational algorithm of amplicon-based Next-Generation Sequencing data
Source: PeerJ. 2019 Nov 15;7:e7972. doi: 10.7717/peerj.7972 (PMC6859874; doi:10.7717/peerj.7972)
Supplement: Supplemental Information 7 [file peerj-07-7972-s009.xlsx]

## Sheet: BRCA1_2
		ciaffo			ciaffo vs all				cindy		cindy vs all				BR1154		BR1154 vs all				BR963		BR963 vs all				kissy		kissy vs all				mino		mino vs all				rina		rina vs all				sandrino		sandrino vs all
contig_srt	attributes	total_reads	amplicon read count normalized on the BRCA1 and BRCA2 total reads	average of normalized amplicon read counts obtained from all samples	%	?	contig_srt	attributes	total_reads	amplicon read count normalized on the BRCA1 and BRCA2 total reads	%	?	contig_srt	attributes	total_reads	amplicon read count normalized on the BRCA1 and BRCA2 total reads	%	?	contig_srt	attributes	total_reads	amplicon read count normalized on the BRCA1 and BRCA2 total reads	%	?	contig_srt	attributes	total_reads	amplicon read count normalized on the BRCA1 and BRCA2 total reads	%	?	contig_srt	attributes	total_reads	amplicon read count normalized on the BRCA1 and BRCA2 total reads	%	?	contig_srt	attributes	total_reads	amplicon read count normalized on the BRCA1 and BRCA2 total reads	%	?	contig_srt	attributes	total_reads	cv amplic/somma cv tot pz	%	?	contig_srt
41276113	GENE_ID=BRCA1	756	0.0030512	0.00268101	1.13808		41276113	GENE_ID=BRCA1	748	0.00319647	1.19227		41276113	GENE_ID=BRCA1	451	0.00236743	0.883038		41276113	GENE_ID=BRCA1	578	0.0031341	1.169		41276113	GENE_ID=BRCA1	283	0.00150952	0.563042		41276113	GENE_ID=BRCA1	788	0.00295885	1.10363	5'UTR-Ex2	41276113	GENE_ID=BRCA1	714	0.00272625	1.01688	5'UTR-Ex2	41276113	GENE_ID=BRCA1	974	0.00371901	1.38717		41276113
41276040	GENE_ID=BRCA1	1902	0.00767644	0.00818079	0.93835		41276040	GENE_ID=BRCA1	2378	0.010162	1.24218		41276040	GENE_ID=BRCA1	1764	0.00925975	1.13189		41276040	GENE_ID=BRCA1	1160	0.00628989	0.768861		41276040	GENE_ID=BRCA1	1634	0.00871574	1.06539		41276040	GENE_ID=BRCA1	2597	0.00975143	1.19199		41276040	GENE_ID=BRCA1	2237	0.00854149	1.04409		41276040	GENE_ID=BRCA1	1771	0.00676217	0.826592		41276040
41275974	GENE_ID=BRCA1	1467	0.00592079	0.00610171	0.97035		41275974	GENE_ID=BRCA1	1007	0.00430327	0.705257		41275974	GENE_ID=BRCA1	886	0.00465087	0.762225		41275974	GENE_ID=BRCA1	1484	0.00804672	1.31877		41275974	GENE_ID=BRCA1	1193	0.00636345	1.0429		41275974	GENE_ID=BRCA1	1535	0.00576374	0.944612		41275974	GENE_ID=BRCA1	1603	0.0061207	1.00311		41275974	GENE_ID=BRCA1	1855	0.00708291	1.16081		41275974
41267746	GENE_ID=BRCA1	1574	0.00635264	0.00655353	0.969346		41267746	GENE_ID=BRCA1	1554	0.0066408	1.01332		41267746	GENE_ID=BRCA1	1751	0.0091915	1.40253		41267746	GENE_ID=BRCA1	1294	0.00701648	1.07064		41267746	GENE_ID=BRCA1	1352	0.00721155	1.10041		41267746	GENE_ID=BRCA1	1823	0.00684515	1.0445		41267746	GENE_ID=BRCA1	1322	0.00504777	0.770236		41267746	GENE_ID=BRCA1	1595	0.00609016	0.929294		41267746
41267625	GENE_ID=BRCA1	1444	0.00582796	0.00666365	0.87459		41267625	GENE_ID=BRCA1	1937	0.00827749	1.24219		41267625	GENE_ID=BRCA1	1312	0.00688707	1.03353		41267625	GENE_ID=BRCA1	1038	0.00562837	0.844636		41267625	GENE_ID=BRCA1	1344	0.00716888	1.07582		41267625	GENE_ID=BRCA1	1969	0.00739336	1.10951		41267625	GENE_ID=BRCA1	1843	0.00703709	1.05604		41267625	GENE_ID=BRCA1	1759	0.00671636	1.00791		41267625
41258442	GENE_ID=BRCA1	1075	0.00433868	0.0042501	1.02084		41258442	GENE_ID=BRCA1	700	0.00299135	0.703831		41258442	GENE_ID=BRCA1	592	0.00310758	0.731178		41258442	GENE_ID=BRCA1	953	0.00516747	1.21585		41258442	GENE_ID=BRCA1	759	0.0040485	0.952566		41258442	GENE_ID=BRCA1	1229	0.00461475	1.0858		41258442	GENE_ID=BRCA1	1170	0.00446739	1.05113		41258442	GENE_ID=BRCA1	1233	0.00470794	1.10773		41258442
41256826	GENE_ID=BRCA1	1166	0.00470596	0.00571385	0.823605		41256826	GENE_ID=BRCA1	1565	0.00668781	1.17045		41256826	GENE_ID=BRCA1	1722	0.00903928	1.58199		41256826	GENE_ID=BRCA1	1092	0.00592117	1.03628		41256826	GENE_ID=BRCA1	1125	0.00600074	1.05021		41256826	GENE_ID=BRCA1	1426	0.00535446	0.937102		41256826	GENE_ID=BRCA1	1329	0.00507449	0.888104		41256826	GENE_ID=BRCA1	1308	0.00499431	0.874071		41256826
41256156	GENE_ID=BRCA1	1368	0.00552123	0.0057531	0.959696		41256156	GENE_ID=BRCA1	1515	0.00647414	1.12533		41256156	GENE_ID=BRCA1	940	0.00493433	0.857682		41256156	GENE_ID=BRCA1	990	0.00536809	0.933078		41256156	GENE_ID=BRCA1	1147	0.00611808	1.06344		41256156	GENE_ID=BRCA1	1658	0.00622559	1.08213		41256156	GENE_ID=BRCA1	1818	0.00694163	1.20659		41256156	GENE_ID=BRCA1	1606	0.00613216	1.06589		41256156
41256050	GENE_ID=BRCA1	1051	0.00424182	0.00417226	1.01667		41256050	GENE_ID=BRCA1	551	0.00235462	0.564351		41256050	GENE_ID=BRCA1	818	0.00429392	1.02916		41256050	GENE_ID=BRCA1	1014	0.00549823	1.31781		41256050	GENE_ID=BRCA1	601	0.00320573	0.768343		41256050	GENE_ID=BRCA1	1587	0.005959	1.42824		41256050	GENE_ID=BRCA1	1153	0.00440248	1.05518		41256050	GENE_ID=BRCA1	847	0.00323408	0.775139		41256050
41251798	GENE_ID=BRCA1	885	0.00357185	0.00516092	0.692095		41251798	GENE_ID=BRCA1	1263	0.00539725	1.04579		41251798	GENE_ID=BRCA1	1951	0.0102414	1.98441		41251798	GENE_ID=BRCA1	1244	0.00674536	1.30701		41251798	GENE_ID=BRCA1	1065	0.0056807	1.10071		41251798	GENE_ID=BRCA1	773	0.00290252	0.562404		41251798	GENE_ID=BRCA1	1550	0.00591833	1.14676		41251798	GENE_ID=BRCA1	666	0.00254297	0.492737		41251798
41251703	GENE_ID=BRCA1	605	0.00244177	0.00273916	0.891431		41251703	GENE_ID=BRCA1	1037	0.00443147	1.61782		41251703	GENE_ID=BRCA1	402	0.00211021	0.770388		41251703	GENE_ID=BRCA1	329	0.00178394	0.651274		41251703	GENE_ID=BRCA1	414	0.00220827	0.806186		41251703	GENE_ID=BRCA1	836	0.00313908	1.146		41251703	GENE_ID=BRCA1	818	0.00312335	1.14026		41251703	GENE_ID=BRCA1	855	0.00326463	1.19184		41251703
41249241	GENE_ID=BRCA1	1179	0.00475843	0.00426143	1.11663		41249241	GENE_ID=BRCA1	707	0.00302126	0.708979		41249241	GENE_ID=BRCA1	598	0.00313907	0.736625		41249241	GENE_ID=BRCA1	863	0.00467946	1.0981		41249241	GENE_ID=BRCA1	753	0.00401649	0.942523		41249241	GENE_ID=BRCA1	1236	0.00464103	1.08908		41249241	GENE_ID=BRCA1	1123	0.00428793	1.00622		41249241	GENE_ID=BRCA1	1362	0.0052005	1.22037		41249241
41247828	GENE_ID=BRCA1	2268	0.00915361	0.00929351	0.984947		41247828	GENE_ID=BRCA1	2578	0.0110167	1.18542		41247828	GENE_ID=BRCA1	2043	0.0107243	1.15396		41247828	GENE_ID=BRCA1	1827	0.00990657	1.06597		41247828	GENE_ID=BRCA1	1816	0.00968652	1.04229		41247828	GENE_ID=BRCA1	2654	0.00996546	1.0723		41247828	GENE_ID=BRCA1	2143	0.00818257	0.880461		41247828	GENE_ID=BRCA1	2454	0.00937006	1.00824		41247828
41246850	GENE_ID=BRCA1	1670	0.00674009	0.00685746	0.982885		41246850	GENE_ID=BRCA1	1982	0.0084698	1.23512		41246850	GENE_ID=BRCA1	1261	0.00661935	0.965277		41246850	GENE_ID=BRCA1	1117	0.00605673	0.883232		41246850	GENE_ID=BRCA1	1192	0.00635811	0.927182		41246850	GENE_ID=BRCA1	2039	0.0076562	1.11648		41246850	GENE_ID=BRCA1	2022	0.00772056	1.12586		41246850	GENE_ID=BRCA1	1654	0.00631544	0.920958		41246850
41246698	GENE_ID=BRCA1	896	0.00361624	0.00380424	0.950582		41246698	GENE_ID=BRCA1	595	0.00254265	0.668372		41246698	GENE_ID=BRCA1	705	0.00370075	0.972796		41246698	GENE_ID=BRCA1	930	0.00504275	1.32556		41246698	GENE_ID=BRCA1	775	0.00413384	1.08664		41246698	GENE_ID=BRCA1	1123	0.00421673	1.10843		41246698	GENE_ID=BRCA1	1020	0.00389465	1.02376		41246698	GENE_ID=BRCA1	949	0.00362355	0.952503		41246698
41246562	GENE_ID=BRCA1	1822	0.00735356	0.00734698	1.0009		41246562	GENE_ID=BRCA1	1954	0.00835014	1.13654		41246562	GENE_ID=BRCA1	1614	0.00847235	1.15317		41246562	GENE_ID=BRCA1	1622	0.008795	1.19709		41246562	GENE_ID=BRCA1	1449	0.00772895	1.05199		41246562	GENE_ID=BRCA1	1976	0.00741965	1.00989		41246562	GENE_ID=BRCA1	1593	0.00608252	0.827894		41246562	GENE_ID=BRCA1	1856	0.00708673	0.964577		41246562
41246406	GENE_ID=BRCA1	1809	0.0073011	0.00664882	1.0981		41246406	GENE_ID=BRCA1	1728	0.00738436	1.11063		41246406	GENE_ID=BRCA1	1345	0.00706029	1.06189		41246406	GENE_ID=BRCA1	976	0.00529218	0.795958		41246406	GENE_ID=BRCA1	1482	0.00790497	1.18893		41246406	GENE_ID=BRCA1	1967	0.00738585	1.11085		41246406	GENE_ID=BRCA1	1896	0.00723946	1.08883		41246406	GENE_ID=BRCA1	1540	0.00588015	0.88439		41246406
41246277	GENE_ID=BRCA1	1877	0.00757554	0.00715703	1.05848		41246277	GENE_ID=BRCA1	1212	0.00517931	0.723667		41246277	GENE_ID=BRCA1	1147	0.00602093	0.841261		41246277	GENE_ID=BRCA1	1580	0.00856726	1.19704		41246277	GENE_ID=BRCA1	1468	0.00783029	1.09407		41246277	GENE_ID=BRCA1	2115	0.00794157	1.10962		41246277	GENE_ID=BRCA1	1958	0.00747619	1.04459		41246277	GENE_ID=BRCA1	1800	0.0068729	0.960301		41246277
41246135	GENE_ID=BRCA1	1288	0.00519835	0.00582023	0.893152		41246135	GENE_ID=BRCA1	1554	0.0066408	1.14099		41246135	GENE_ID=BRCA1	1455	0.00763772	1.31227		41246135	GENE_ID=BRCA1	989	0.00536267	0.921385		41246135	GENE_ID=BRCA1	1182	0.00630477	1.08325		41246135	GENE_ID=BRCA1	1739	0.00652974	1.1219		41246135	GENE_ID=BRCA1	1418	0.00541432	0.930259		41246135	GENE_ID=BRCA1	1357	0.00518141	0.890241		41246135
41246013	GENE_ID=BRCA1	1793	0.00723652	0.00718044	1.00781		41246013	GENE_ID=BRCA1	1925	0.00822621	1.14564		41246013	GENE_ID=BRCA1	1446	0.00759047	1.0571		41246013	GENE_ID=BRCA1	1004	0.00544401	0.758172		41246013	GENE_ID=BRCA1	1626	0.00867306	1.20787		41246013	GENE_ID=BRCA1	2164	0.00812556	1.13162		41246013	GENE_ID=BRCA1	2116	0.00807948	1.12521		41246013	GENE_ID=BRCA1	1728	0.00659799	0.918883		41246013
41245945	GENE_ID=BRCA1	2357	0.00951282	0.00826081	1.15156		41245945	GENE_ID=BRCA1	1223	0.00522632	0.632664		41245945	GENE_ID=BRCA1	1140	0.00598419	0.724407		41245945	GENE_ID=BRCA1	2279	0.0123575	1.49591		41245945	GENE_ID=BRCA1	1493	0.00796364	0.964027		41245945	GENE_ID=BRCA1	2291	0.00860243	1.04135		41245945	GENE_ID=BRCA1	2305	0.00880114	1.06541		41245945	GENE_ID=BRCA1	2164	0.00826276	1.00024		41245945
41245803	GENE_ID=BRCA1	1949	0.00786613	0.00825597	0.952781		41245803	GENE_ID=BRCA1	2193	0.00937147	1.13511		41245803	GENE_ID=BRCA1	1969	0.0103358	1.25192		41245803	GENE_ID=BRCA1	1773	0.00961377	1.16446		41245803	GENE_ID=BRCA1	1543	0.00823034	0.996896		41245803	GENE_ID=BRCA1	2154	0.00808801	0.979656		41245803	GENE_ID=BRCA1	1978	0.00755256	0.914799		41245803	GENE_ID=BRCA1	2018	0.00770529	0.933299		41245803
41245657	GENE_ID=BRCA1	1101	0.00444362	0.00446332	0.995586		41245657	GENE_ID=BRCA1	1130	0.00482889	1.08191		41245657	GENE_ID=BRCA1	1041	0.00546451	1.22432		41245657	GENE_ID=BRCA1	663	0.003595	0.805454		41245657	GENE_ID=BRCA1	965	0.0051473	1.15324		41245657	GENE_ID=BRCA1	1131	0.00424677	0.951483		41245657	GENE_ID=BRCA1	1484	0.00566633	1.26953		41245657	GENE_ID=BRCA1	1022	0.00390228	0.874301		41245657
41245535	GENE_ID=BRCA1	2003	0.00808408	0.00722845	1.11837		41245535	GENE_ID=BRCA1	1153	0.00492718	0.681637		41245535	GENE_ID=BRCA1	1213	0.00636739	0.880878		41245535	GENE_ID=BRCA1	1624	0.00880584	1.21822		41245535	GENE_ID=BRCA1	1245	0.00664081	0.918705		41245535	GENE_ID=BRCA1	2085	0.00782893	1.08307		41245535	GENE_ID=BRCA1	2009	0.00767093	1.06121		41245535	GENE_ID=BRCA1	1991	0.0076022	1.0517		41245535
41245395	GENE_ID=BRCA1	1508	0.00608627	0.00650915	0.935033		41245395	GENE_ID=BRCA1	1586	0.00677755	1.04123		41245395	GENE_ID=BRCA1	1563	0.00820464	1.26048		41245395	GENE_ID=BRCA1	1232	0.00668029	1.02629		41245395	GENE_ID=BRCA1	1494	0.00796898	1.22427		41245395	GENE_ID=BRCA1	2036	0.00764494	1.17449		41245395	GENE_ID=BRCA1	1584	0.00604816	0.929178		41245395	GENE_ID=BRCA1	1385	0.00528832	0.812444		41245395
41245286	GENE_ID=BRCA1	1864	0.00752308	0.00806412	0.932907		41245286	GENE_ID=BRCA1	2329	0.00995265	1.23419		41245286	GENE_ID=BRCA1	1606	0.00843036	1.04542		41245286	GENE_ID=BRCA1	1281	0.00694599	0.861345		41245286	GENE_ID=BRCA1	1377	0.0073449	0.910812		41245286	GENE_ID=BRCA1	2271	0.00852734	1.05744		41245286	GENE_ID=BRCA1	2456	0.0093777	1.16289		41245286	GENE_ID=BRCA1	2098	0.00801075	0.993382		41245286
41245170	GENE_ID=BRCA1	1200	0.00484318	0.00441772	1.09631		41245170	GENE_ID=BRCA1	719	0.00307254	0.695504		41245170	GENE_ID=BRCA1	734	0.00385298	0.872163		41245170	GENE_ID=BRCA1	1028	0.00557414	1.26177		41245170	GENE_ID=BRCA1	791	0.00421918	0.955058		41245170	GENE_ID=BRCA1	1392	0.00522679	1.18314		41245170	GENE_ID=BRCA1	1198	0.0045743	1.03544		41245170	GENE_ID=BRCA1	1096	0.00418484	0.947283		41245170
41245022	GENE_ID=BRCA1	2017	0.00814058	0.00871572	0.934011		41245022	GENE_ID=BRCA1	2122	0.00906807	1.04043		41245022	GENE_ID=BRCA1	2155	0.0113122	1.29791		41245022	GENE_ID=BRCA1	1911	0.010362	1.18889		41245022	GENE_ID=BRCA1	1697	0.00905178	1.03856		41245022	GENE_ID=BRCA1	2188	0.00821568	0.942628		41245022	GENE_ID=BRCA1	2097	0.00800693	0.918677		41245022	GENE_ID=BRCA1	2081	0.00794584	0.911668		41245022
41244878	GENE_ID=BRCA1	902	0.00364046	0.00312257	1.16585		41244878	GENE_ID=BRCA1	797	0.00340587	1.09072		41244878	GENE_ID=BRCA1	551	0.00289236	0.926274		41244878	GENE_ID=BRCA1	362	0.00196288	0.628609		41244878	GENE_ID=BRCA1	891	0.00475258	1.52201		41244878	GENE_ID=BRCA1	935	0.00351081	1.12433		41244878	GENE_ID=BRCA1	893	0.00340972	1.09196		41244878	GENE_ID=BRCA1	669	0.00255443	0.818053		41244878
41244709	GENE_ID=BRCA1	2025	0.00817287	0.00766146	1.06675		41244709	GENE_ID=BRCA1	1305	0.00557673	0.727894		41244709	GENE_ID=BRCA1	1135	0.00595794	0.777651		41244709	GENE_ID=BRCA1	1612	0.00874078	1.14088		41244709	GENE_ID=BRCA1	1290	0.00688084	0.898111		41244709	GENE_ID=BRCA1	2225	0.00835461	1.09047		41244709	GENE_ID=BRCA1	2117	0.0080833	1.05506		41244709	GENE_ID=BRCA1	2180	0.00832385	1.08646		41244709
41244629	GENE_ID=BRCA1	2890	0.011664	0.00889894	1.31072		41244629	GENE_ID=BRCA1	2131	0.00910653	1.02333		41244629	GENE_ID=BRCA1	2064	0.0108345	1.21751		41244629	GENE_ID=BRCA1	1808	0.00980355	1.10165		41244629	GENE_ID=BRCA1	1694	0.00903578	1.01538		41244629	GENE_ID=BRCA1	2394	0.00898919	1.01014		41244629	GENE_ID=BRCA1	2183	0.00833531	0.936663		41244629	GENE_ID=BRCA1	1657	0.00632689	0.710971		41244629
41244483	GENE_ID=BRCA1	1054	0.00425393	0.00398223	1.06823		41244483	GENE_ID=BRCA1	1082	0.00462377	1.1611		41244483	GENE_ID=BRCA1	668	0.00350652	0.880543		41244483	GENE_ID=BRCA1	539	0.00292263	0.733917		41244483	GENE_ID=BRCA1	809	0.0043152	1.08361		41244483	GENE_ID=BRCA1	1116	0.00419045	1.05229		41244483	GENE_ID=BRCA1	1336	0.00510122	1.281		41244483	GENE_ID=BRCA1	1065	0.00406647	1.02115		41244483
41244323	GENE_ID=BRCA1	1696	0.00684503	0.00652625	1.04885		41244323	GENE_ID=BRCA1	1094	0.00467505	0.716346		41244323	GENE_ID=BRCA1	1056	0.00554325	0.849377		41244323	GENE_ID=BRCA1	1392	0.00754787	1.15654		41244323	GENE_ID=BRCA1	1040	0.00554735	0.850005		41244323	GENE_ID=BRCA1	1780	0.00668369	1.02412		41244323	GENE_ID=BRCA1	1951	0.00744947	1.14146		41244323	GENE_ID=BRCA1	1902	0.00726237	1.11279		41244323
41244258	GENE_ID=BRCA1	2971	0.0119909	0.00943581	1.27079		41244258	GENE_ID=BRCA1	2120	0.00905952	0.960121		41244258	GENE_ID=BRCA1	2265	0.0118896	1.26006		41244258	GENE_ID=BRCA1	1851	0.0100367	1.06368		41244258	GENE_ID=BRCA1	1847	0.00985188	1.04409		41244258	GENE_ID=BRCA1	2394	0.00898919	0.952668		41244258	GENE_ID=BRCA1	2201	0.00840404	0.890654		41244258	GENE_ID=BRCA1	1800	0.0068729	0.728386		41244258
41244100	GENE_ID=BRCA1	1228	0.00495619	0.00457196	1.08404		41244100	GENE_ID=BRCA1	1277	0.00545708	1.1936		41244100	GENE_ID=BRCA1	880	0.00461937	1.01037		41244100	GENE_ID=BRCA1	679	0.00368175	0.80529		41244100	GENE_ID=BRCA1	1033	0.00551001	1.20517		41244100	GENE_ID=BRCA1	1195	0.00448708	0.981436		41244100	GENE_ID=BRCA1	1348	0.00514704	1.12578		41244100	GENE_ID=BRCA1	1146	0.00437575	0.957084		41244100
41243946	GENE_ID=BRCA1	904	0.00364853	0.00440173	0.828885		41243946	GENE_ID=BRCA1	694	0.00296571	0.67376		41243946	GENE_ID=BRCA1	810	0.00425192	0.965966		41243946	GENE_ID=BRCA1	1125	0.00610011	1.38584		41243946	GENE_ID=BRCA1	952	0.00507796	1.15363		41243946	GENE_ID=BRCA1	1090	0.00409282	0.929821		41243946	GENE_ID=BRCA1	1223	0.00466976	1.06089		41243946	GENE_ID=BRCA1	1127	0.0043032	0.977616		41243946
41243808	GENE_ID=BRCA1	2120	0.00855629	0.00768321	1.11363		41243808	GENE_ID=BRCA1	1958	0.00836724	1.08903		41243808	GENE_ID=BRCA1	1241	0.00651437	0.84787		41243808	GENE_ID=BRCA1	1371	0.007434	0.967563		41243808	GENE_ID=BRCA1	1784	0.00951583	1.23852		41243808	GENE_ID=BRCA1	2439	0.00915816	1.19197		41243808	GENE_ID=BRCA1	1930	0.00736928	0.95914		41243808	GENE_ID=BRCA1	1798	0.00686527	0.893541		41243808
41243639	GENE_ID=BRCA1	1483	0.00598537	0.00633356	0.945024		41243639	GENE_ID=BRCA1	1738	0.0074271	1.17266		41243639	GENE_ID=BRCA1	1235	0.00648287	1.02357		41243639	GENE_ID=BRCA1	899	0.00487466	0.769656		41243639	GENE_ID=BRCA1	1445	0.00770761	1.21695		41243639	GENE_ID=BRCA1	1813	0.0068076	1.07485		41243639	GENE_ID=BRCA1	1983	0.00757165	1.19548		41243639	GENE_ID=BRCA1	1602	0.00611689	0.96579		41243639
41243471	GENE_ID=BRCA1	1445	0.005832	0.00612525	0.952124		41243471	GENE_ID=BRCA1	919	0.00392722	0.641152		41243471	GENE_ID=BRCA1	1187	0.00623091	1.01725		41243471	GENE_ID=BRCA1	1331	0.0072171	1.17826		41243471	GENE_ID=BRCA1	1424	0.0075956	1.24005		41243471	GENE_ID=BRCA1	1535	0.00576374	0.940981		41243471	GENE_ID=BRCA1	1769	0.00675454	1.10274		41243471	GENE_ID=BRCA1	1500	0.00572742	0.935051		41243471
41243322	GENE_ID=BRCA1	1799	0.00726074	0.00784929	0.925019		41243322	GENE_ID=BRCA1	2194	0.00937575	1.19447		41243322	GENE_ID=BRCA1	1786	0.00937523	1.19441		41243322	GENE_ID=BRCA1	1584	0.00858895	1.09423		41243322	GENE_ID=BRCA1	1391	0.00741958	0.945255		41243322	GENE_ID=BRCA1	2265	0.00850481	1.08351		41243322	GENE_ID=BRCA1	1959	0.00748001	0.952954		41243322	GENE_ID=BRCA1	2036	0.00777402	0.990411		41243322
41242918	GENE_ID=BRCA1	1805	0.00728495	0.00746669	0.97566		41242918	GENE_ID=BRCA1	1989	0.00849971	1.13835		41242918	GENE_ID=BRCA1	1407	0.00738575	0.989159		41242918	GENE_ID=BRCA1	1137	0.00616517	0.82569		41242918	GENE_ID=BRCA1	1941	0.0103533	1.38659		41242918	GENE_ID=BRCA1	2037	0.00764869	1.02437		41242918	GENE_ID=BRCA1	2181	0.00832767	1.11531		41242918	GENE_ID=BRCA1	1822	0.00695691	0.931725		41242918
41234528	GENE_ID=BRCA1	808	0.00326108	0.003253	1.00248		41234528	GENE_ID=BRCA1	509	0.00217514	0.668657		41234528	GENE_ID=BRCA1	451	0.00236743	0.727769		41234528	GENE_ID=BRCA1	715	0.00387696	1.19181		41234528	GENE_ID=BRCA1	602	0.00321106	0.987108		41234528	GENE_ID=BRCA1	814	0.00305647	0.939587		41234528	GENE_ID=BRCA1	954	0.00364264	1.11978		41234528	GENE_ID=BRCA1	1109	0.00423447	1.30171		41234528
41234356	GENE_ID=BRCA1	1852	0.00747464	0.00910367	0.821058		41234356	GENE_ID=BRCA1	2399	0.0102518	1.12612		41234356	GENE_ID=BRCA1	2300	0.0120734	1.32621		41234356	GENE_ID=BRCA1	1875	0.0101668	1.11678		41234356	GENE_ID=BRCA1	1893	0.0100972	1.10914		41234356	GENE_ID=BRCA1	2320	0.00871132	0.956902		41234356	GENE_ID=BRCA1	2177	0.0083124	0.913081		41234356	GENE_ID=BRCA1	2312	0.00882786	0.969703		41234356
41231265	GENE_ID=BRCA1	1074	0.00433465	0.00412491	1.05085		41231265	GENE_ID=BRCA1	1097	0.00468787	1.13648		41231265	GENE_ID=BRCA1	869	0.00456163	1.10587		41231265	GENE_ID=BRCA1	625	0.00338895	0.821581		41231265	GENE_ID=BRCA1	909	0.00484859	1.17544		41231265	GENE_ID=BRCA1	1163	0.00436693	1.05867		41231265	GENE_ID=BRCA1	1216	0.00464303	1.12561		41231265	GENE_ID=BRCA1	973	0.00371519	0.900671		41231265
41228577	GENE_ID=BRCA1	2076	0.0083787	0.00785605	1.06653		41228577	GENE_ID=BRCA1	1391	0.00594424	0.756645		41228577	GENE_ID=BRCA1	1117	0.00586346	0.746361		41228577	GENE_ID=BRCA1	2028	0.0109965	1.39974		41228577	GENE_ID=BRCA1	1296	0.00691285	0.879939		41228577	GENE_ID=BRCA1	2218	0.00832833	1.06012		41228577	GENE_ID=BRCA1	2060	0.00786566	1.00122		41228577	GENE_ID=BRCA1	2294	0.00875914	1.11495		41228577
41228420	GENE_ID=BRCA1	1438	0.00580375	0.0066526	0.872403		41228420	GENE_ID=BRCA1	1766	0.00754675	1.13441		41228420	GENE_ID=BRCA1	1791	0.00940148	1.4132		41228420	GENE_ID=BRCA1	1348	0.00730928	1.09871		41228420	GENE_ID=BRCA1	1214	0.00647546	0.973373		41228420	GENE_ID=BRCA1	1697	0.00637203	0.957827		41228420	GENE_ID=BRCA1	1756	0.0067049	1.00786		41228420	GENE_ID=BRCA1	1617	0.00617416	0.928083		41228420
41226417	GENE_ID=BRCA1	2240	0.00904061	0.00821815	1.10008		41226417	GENE_ID=BRCA1	2463	0.0105253	1.28074		41226417	GENE_ID=BRCA1	1561	0.00819414	0.997079		41226417	GENE_ID=BRCA1	1113	0.00603504	0.734355		41226417	GENE_ID=BRCA1	1740	0.00928114	1.12935		41226417	GENE_ID=BRCA1	2272	0.00853109	1.03808		41226417	GENE_ID=BRCA1	2257	0.00861786	1.04864		41226417	GENE_ID=BRCA1	2120	0.00809475	0.984985		41226417
41226336	GENE_ID=BRCA1	2178	0.00879037	0.00785786	1.11867		41226336	GENE_ID=BRCA1	1135	0.00485026	0.617249		41226336	GENE_ID=BRCA1	1293	0.00678733	0.863763		41226336	GENE_ID=BRCA1	1840	0.00997706	1.26969		41226336	GENE_ID=BRCA1	1586	0.0084597	1.07659		41226336	GENE_ID=BRCA1	2407	0.009038	1.15019		41226336	GENE_ID=BRCA1	2054	0.00784275	0.998076		41226336	GENE_ID=BRCA1	1924	0.00734637	0.934907		41226336
41223148	GENE_ID=BRCA1	1909	0.0077047	0.00809455	0.951837		41223148	GENE_ID=BRCA1	2090	0.00893132	1.10337		41223148	GENE_ID=BRCA1	1899	0.0099684	1.23149		41223148	GENE_ID=BRCA1	1604	0.0086974	1.07448		41223148	GENE_ID=BRCA1	1708	0.00911045	1.1255		41223148	GENE_ID=BRCA1	2226	0.00835837	1.03259		41223148	GENE_ID=BRCA1	1915	0.00731201	0.903325		41223148	GENE_ID=BRCA1	1861	0.00710582	0.877852		41223148
41223017	GENE_ID=BRCA1	2071	0.00835852	0.00845251	0.988881		41223017	GENE_ID=BRCA1	2321	0.00991846	1.17343		41223017	GENE_ID=BRCA1	1825	0.00957995	1.13339		41223017	GENE_ID=BRCA1	1261	0.00683754	0.808936		41223017	GENE_ID=BRCA1	1781	0.00949983	1.12391		41223017	GENE_ID=BRCA1	2418	0.0090793	1.07415		41223017	GENE_ID=BRCA1	2398	0.00915624	1.08326		41223017	GENE_ID=BRCA1	2052	0.00783511	0.926957		41223017
41222948	GENE_ID=BRCA1	609	0.00245791	0.00207758	1.18307		41222948	GENE_ID=BRCA1	341	0.00145722	0.7014		41222948	GENE_ID=BRCA1	327	0.00171652	0.826209		41222948	GENE_ID=BRCA1	496	0.00268947	1.29452		41222948	GENE_ID=BRCA1	413	0.00220294	1.06034		41222948	GENE_ID=BRCA1	554	0.0020802	1.00126		41222948	GENE_ID=BRCA1	589	0.00224897	1.08249		41222948	GENE_ID=BRCA1	506	0.00193205	0.929951		41222948
41222877	GENE_ID=BRCA1	3571	0.0144125	0.011493	1.25403		41222877	GENE_ID=BRCA1	2689	0.0114911	0.999832		41222877	GENE_ID=BRCA1	2425	0.0127295	1.10759		41222877	GENE_ID=BRCA1	2479	0.0134419	1.16958		41222877	GENE_ID=BRCA1	2221	0.0118468	1.03078		41222877	GENE_ID=BRCA1	2955	0.0110957	0.96543		41222877	GENE_ID=BRCA1	2605	0.00994662	0.865451		41222877	GENE_ID=BRCA1	2655	0.0101375	0.882062		41222877
41219589	GENE_ID=BRCA1	1501	0.00605801	0.00501198	1.20871		41219589	GENE_ID=BRCA1	1328	0.00567502	1.13229		41219589	GENE_ID=BRCA1	906	0.00475586	0.948898		41219589	GENE_ID=BRCA1	643	0.00348655	0.695644		41219589	GENE_ID=BRCA1	1119	0.00596873	1.19089		41219589	GENE_ID=BRCA1	1571	0.00589892	1.17696		41219589	GENE_ID=BRCA1	1354	0.00516995	1.03152		41219589	GENE_ID=BRCA1	1211	0.00462394	0.922578		41219589
41215856	GENE_ID=BRCA1	1285	0.00518624	0.00542856	0.955362		41215856	GENE_ID=BRCA1	936	0.00399986	0.736819		41215856	GENE_ID=BRCA1	822	0.00431492	0.794855		41215856	GENE_ID=BRCA1	1232	0.00668029	1.23058		41215856	GENE_ID=BRCA1	1043	0.00556335	1.02483		41215856	GENE_ID=BRCA1	1561	0.00586137	1.07973		41215856	GENE_ID=BRCA1	1457	0.00556323	1.02481		41215856	GENE_ID=BRCA1	1555	0.00593743	1.09374		41215856
41215278	GENE_ID=BRCA1	736	0.00297048	0.00370608	0.801518		41215278	GENE_ID=BRCA1	1028	0.00439301	1.18535		41215278	GENE_ID=BRCA1	890	0.00467187	1.2606		41215278	GENE_ID=BRCA1	725	0.00393118	1.06074		41215278	GENE_ID=BRCA1	711	0.00379247	1.02331		41215278	GENE_ID=BRCA1	983	0.00369105	0.995945		41215278	GENE_ID=BRCA1	947	0.00361591	0.975671		41215278	GENE_ID=BRCA1	959	0.00366173	0.988035		41215278
41209003	GENE_ID=BRCA1	1981	0.00799529	0.00775107	1.03151		41209003	GENE_ID=BRCA1	2003	0.00855954	1.1043		41209003	GENE_ID=BRCA1	795	0.00417318	0.538401		41209003	GENE_ID=BRCA1	1499	0.00812805	1.04864		41209003	GENE_ID=BRCA1	1916	0.0102199	1.31852		41209003	GENE_ID=BRCA1	2049	0.00769375	0.992606		41209003	GENE_ID=BRCA1	2393	0.00913714	1.17882		41209003	GENE_ID=BRCA1	2111	0.00806039	1.03991		41209003
41203084	GENE_ID=BRCA1	1457	0.00588043	0.0056482	1.04112		41203084	GENE_ID=BRCA1	1025	0.00438019	0.775502		41203084	GENE_ID=BRCA1	998	0.00523879	0.927514		41203084	GENE_ID=BRCA1	609	0.00330219	0.584644		41203084	GENE_ID=BRCA1	1292	0.00689151	1.22012		41203084	GENE_ID=BRCA1	1668	0.00626314	1.10887		41203084	GENE_ID=BRCA1	1727	0.00659417	1.16748		41203084	GENE_ID=BRCA1	1562	0.00596415	1.05594		41203084
41202931	GENE_ID=BRCA1	1012	0.00408442	0.00458624	0.890581		41202931	GENE_ID=BRCA1	1157	0.00494428	1.07807		41202931	GENE_ID=BRCA1	1301	0.00682932	1.48909		41202931	GENE_ID=BRCA1	494	0.00267862	0.584057		41202931	GENE_ID=BRCA1	1130	0.00602741	1.31424		41202931	GENE_ID=BRCA1	1213	0.00455467	0.993117		41202931	GENE_ID=BRCA1	1213	0.00463157	1.00989		41202931	GENE_ID=BRCA1	1178	0.00449793	0.980746		41202931
41201075	GENE_ID=BRCA1	1861	0.00751097	0.00758235	0.990586		41201075	GENE_ID=BRCA1	2255	0.00963642	1.2709		41201075	GENE_ID=BRCA1	1622	0.00851435	1.12292		41201075	GENE_ID=BRCA1	529	0.00286841	0.378301		41201075	GENE_ID=BRCA1	1974	0.0105293	1.38866		41201075	GENE_ID=BRCA1	2010	0.00754731	0.995379		41201075	GENE_ID=BRCA1	2350	0.00897296	1.1834		41201075	GENE_ID=BRCA1	1936	0.00739219	0.974921		41201075
41199644	GENE_ID=BRCA1	3517	0.0141946	0.0121278	1.17042		41199644	GENE_ID=BRCA1	2120	0.00905952	0.747006		41199644	GENE_ID=BRCA1	1955	0.0102624	0.846186		41199644	GENE_ID=BRCA1	2617	0.0141902	1.17006		41199644	GENE_ID=BRCA1	2451	0.0130736	1.07799		41199644	GENE_ID=BRCA1	3677	0.0138067	1.13844		41199644	GENE_ID=BRCA1	3259	0.0124438	1.02606		41199644	GENE_ID=BRCA1	3221	0.0122987	1.01409		41199644
41199641	GENE_ID=BRCA1	2326	0.0093877	0.00905297	1.03698		41199641	GENE_ID=BRCA1	1977	0.00844843	0.933222		41199641	GENE_ID=BRCA1	2269	0.0119106	1.31566		41199641	GENE_ID=BRCA1	1986	0.0107687	1.18952		41199641	GENE_ID=BRCA1	2237	0.0119321	1.31804		41199641	GENE_ID=BRCA1	2249	0.00844473	0.932813		41199641	GENE_ID=BRCA1	2039	0.00778547	0.859991		41199641	GENE_ID=BRCA1	1725	0.00658653	0.727555		41199641
41197743	GENE_ID=BRCA1	2671	0.0107801	0.0116085	0.928636		41197743	GENE_ID=BRCA1	3223	0.013773	1.18646		41197743	GENE_ID=BRCA1	2855	0.0149867	1.29101		41197743	GENE_ID=BRCA1	1966	0.0106603	0.918313		41197743	GENE_ID=BRCA1	2225	0.0118681	1.02236		41197743	GENE_ID=BRCA1	3087	0.0115913	0.998516		41197743	GENE_ID=BRCA1	3304	0.0126156	1.08675		41197743	GENE_ID=BRCA1	2579	0.00984735	0.848284		41197743
41197603	GENE_ID=BRCA1	2259	0.00911729	0.0093714	0.972884		41197603	GENE_ID=BRCA1	1381	0.00590151	0.629736		41197603	GENE_ID=BRCA1	1578	0.00828338	0.883899		41197603	GENE_ID=BRCA1	2093	0.0113489	1.21102		41197603	GENE_ID=BRCA1	2060	0.010988	1.1725		41197603	GENE_ID=BRCA1	2808	0.0105437	1.12509		41197603	GENE_ID=BRCA1	2708	0.0103399	1.10335		41197603	GENE_ID=BRCA1	2402	0.00917151	0.97867		41197603
32972809	GENE_ID=BRCA2	1076	0.00434272	0.00515324	0.842716		32972809	GENE_ID=BRCA2	1382	0.00590578	1.14603		32972809	GENE_ID=BRCA2	1359	0.00713378	1.38433		32972809	GENE_ID=BRCA2	1071	0.0058073	1.12692		32972809	GENE_ID=BRCA2	1030	0.00549401	1.06613		32972809	GENE_ID=BRCA2	1238	0.00464854	0.902061		32972809	GENE_ID=BRCA2	1319	0.00503631	0.977309		32972809	GENE_ID=BRCA2	1215	0.00463921	0.90025		32972809
32972688	GENE_ID=BRCA2	2014	0.00812847	0.00808899	1.00488		32972688	GENE_ID=BRCA2	2563	0.0109526	1.35402		32972688	GENE_ID=BRCA2	1542	0.0080944	1.00067		32972688	GENE_ID=BRCA2	1076	0.00583441	0.721279		32972688	GENE_ID=BRCA2	1536	0.00819301	1.01286		32972688	GENE_ID=BRCA2	2322	0.00871883	1.07786		32972688	GENE_ID=BRCA2	2412	0.00920969	1.13855		32972688	GENE_ID=BRCA2	2029	0.00774729	0.957758		32972688
32972534	GENE_ID=BRCA2	1224	0.00494005	0.00482808	1.02319		32972534	GENE_ID=BRCA2	845	0.00361099	0.747914		32972534	GENE_ID=BRCA2	763	0.00400521	0.829565		32972534	GENE_ID=BRCA2	1140	0.00618144	1.28031		32972534	GENE_ID=BRCA2	894	0.00476858	0.987678		32972534	GENE_ID=BRCA2	1329	0.00499024	1.03359		32972534	GENE_ID=BRCA2	1304	0.00497904	1.03127		32972534	GENE_ID=BRCA2	1356	0.00517759	1.07239		32972534
32972377	GENE_ID=BRCA2	1971	0.00795493	0.00887373	0.896458		32972377	GENE_ID=BRCA2	2187	0.00934583	1.0532		32972377	GENE_ID=BRCA2	2216	0.0116324	1.31088		32972377	GENE_ID=BRCA2	1895	0.0102753	1.15795		32972377	GENE_ID=BRCA2	1988	0.010604	1.19498		32972377	GENE_ID=BRCA2	2329	0.00874512	0.985507		32972377	GENE_ID=BRCA2	2135	0.00815203	0.91867		32972377	GENE_ID=BRCA2	1989	0.00759456	0.855848		32972377
32972201	GENE_ID=BRCA2	1116	0.00450416	0.00369723	1.21825		32972201	GENE_ID=BRCA2	926	0.00395713	1.0703		32972201	GENE_ID=BRCA2	616	0.00323356	0.874591		32972201	GENE_ID=BRCA2	606	0.00328592	0.888754		32972201	GENE_ID=BRCA2	770	0.00410717	1.11088		32972201	GENE_ID=BRCA2	1110	0.00416792	1.12731		32972201	GENE_ID=BRCA2	1066	0.00407029	1.1009		32972201	GENE_ID=BRCA2	916	0.00349754	0.945992		32972201
32971071	GENE_ID=BRCA2	1218	0.00491583	0.00440196	1.11674		32971071	GENE_ID=BRCA2	685	0.00292725	0.664988		32971071	GENE_ID=BRCA2	657	0.00344878	0.783465		32971071	GENE_ID=BRCA2	1032	0.00559583	1.27121		32971071	GENE_ID=BRCA2	809	0.0043152	0.980289		32971071	GENE_ID=BRCA2	1157	0.0043444	0.986923		32971071	GENE_ID=BRCA2	1207	0.00460866	1.04696		32971071	GENE_ID=BRCA2	1266	0.00483394	1.09813		32971071
32970902	GENE_ID=BRCA2	800	0.00322879	0.00431866	0.747637		32970902	GENE_ID=BRCA2	1307	0.00558528	1.29329		32970902	GENE_ID=BRCA2	1322	0.00693956	1.60688		32970902	GENE_ID=BRCA2	882	0.00478248	1.1074		32970902	GENE_ID=BRCA2	795	0.00424052	0.981907		32970902	GENE_ID=BRCA2	1055	0.0039614	0.917275		32970902	GENE_ID=BRCA2	1027	0.00392137	0.908007		32970902	GENE_ID=BRCA2	966	0.00368846	0.854075		32970902
32968978	GENE_ID=BRCA2	1657	0.00668763	0.00623598	1.07243		32968978	GENE_ID=BRCA2	1828	0.0078117	1.25268		32968978	GENE_ID=BRCA2	1154	0.00605768	0.971408		32968978	GENE_ID=BRCA2	979	0.00530845	0.851262		32968978	GENE_ID=BRCA2	1147	0.00611808	0.981094		32968978	GENE_ID=BRCA2	1669	0.0062669	1.00496		32968978	GENE_ID=BRCA2	1882	0.007186	1.15235		32968978	GENE_ID=BRCA2	1590	0.00607107	0.973555		32968978
32968840	GENE_ID=BRCA2	1216	0.00490776	0.00491365	0.998801		32968840	GENE_ID=BRCA2	866	0.00370073	0.753153		32968840	GENE_ID=BRCA2	649	0.00340679	0.693332		32968840	GENE_ID=BRCA2	1081	0.00586152	1.19291		32968840	GENE_ID=BRCA2	881	0.00469924	0.956366		32968840	GENE_ID=BRCA2	1310	0.00491889	1.00107		32968840	GENE_ID=BRCA2	1448	0.00552887	1.12521		32968840	GENE_ID=BRCA2	1569	0.00599088	1.21923		32968840
32968693	GENE_ID=BRCA2	901	0.00363642	0.00401277	0.906213		32968693	GENE_ID=BRCA2	1066	0.0045554	1.13523		32968693	GENE_ID=BRCA2	1112	0.00583721	1.45466		32968693	GENE_ID=BRCA2	874	0.00473911	1.18101		32968693	GENE_ID=BRCA2	752	0.00401116	0.999599		32968693	GENE_ID=BRCA2	929	0.00348828	0.869296		32968693	GENE_ID=BRCA2	1004	0.00383355	0.955339		32968693	GENE_ID=BRCA2	946	0.00361209	0.90015		32968693
32954203	GENE_ID=BRCA2	1387	0.00559791	0.00527253	1.06171		32954203	GENE_ID=BRCA2	1596	0.00682028	1.29355		32954203	GENE_ID=BRCA2	909	0.0047716	0.904993		32954203	GENE_ID=BRCA2	812	0.00440292	0.835068		32954203	GENE_ID=BRCA2	964	0.00514196	0.975237		32954203	GENE_ID=BRCA2	1444	0.00542205	1.02836		32954203	GENE_ID=BRCA2	1661	0.00634216	1.20287		32954203	GENE_ID=BRCA2	1447	0.00552505	1.04789		32954203
32954056	GENE_ID=BRCA2	1703	0.00687328	0.00666536	1.03119		32954056	GENE_ID=BRCA2	1182	0.00505111	0.757814		32954056	GENE_ID=BRCA2	1094	0.00574272	0.861577		32954056	GENE_ID=BRCA2	1467	0.00795454	1.19341		32954056	GENE_ID=BRCA2	1129	0.00602207	0.903487		32954056	GENE_ID=BRCA2	1844	0.006924	1.0388		32954056	GENE_ID=BRCA2	1891	0.00722037	1.08327		32954056	GENE_ID=BRCA2	1842	0.00703327	1.0552		32954056
32954024	GENE_ID=BRCA2	42	0.000169511	0.000191949	0.883107		32954024	GENE_ID=BRCA2	55	0.000235035	1.22446		32954024	GENE_ID=BRCA2	48	0.000251966	1.31267		32954024	GENE_ID=BRCA2	38	0.000206048	1.07345		32954024	GENE_ID=BRCA2	38	0.000202692	1.05597		32954024	GENE_ID=BRCA2	33	0.000123911	0.645542		32954024	GENE_ID=BRCA2	44	0.000168004	0.875256		32954024	GENE_ID=BRCA2	53	0.000202369	1.05429		32954024
32953881	GENE_ID=BRCA2	1427	0.00575935	0.0057554	1.00069		32953881	GENE_ID=BRCA2	1738	0.0074271	1.29046		32953881	GENE_ID=BRCA2	1080	0.00566923	0.985028		32953881	GENE_ID=BRCA2	824	0.00446799	0.776312		32953881	GENE_ID=BRCA2	1050	0.00560069	0.973118		32953881	GENE_ID=BRCA2	1522	0.00571493	0.992968		32953881	GENE_ID=BRCA2	1846	0.00704855	1.22468		32953881	GENE_ID=BRCA2	1574	0.00600997	1.04423		32953881
32953584	GENE_ID=BRCA2	840	0.00339023	0.00384227	0.88235		32953584	GENE_ID=BRCA2	1093	0.00467078	1.21563		32953584	GENE_ID=BRCA2	902	0.00473486	1.23231		32953584	GENE_ID=BRCA2	776	0.00420772	1.09511		32953584	GENE_ID=BRCA2	655	0.00349376	0.909297		32953584	GENE_ID=BRCA2	1004	0.0037699	0.981165		32953584	GENE_ID=BRCA2	1018	0.00388701	1.01164		32953584	GENE_ID=BRCA2	996	0.00380301	0.989782		32953584
32953471	GENE_ID=BRCA2	2244	0.00905675	0.00902879	1.0031		32953471	GENE_ID=BRCA2	2574	0.0109996	1.21828		32953471	GENE_ID=BRCA2	1890	0.00992116	1.09884		32953471	GENE_ID=BRCA2	1278	0.00692972	0.767514		32953471	GENE_ID=BRCA2	1841	0.00981987	1.08762		32953471	GENE_ID=BRCA2	2719	0.0102095	1.13077		32953471	GENE_ID=BRCA2	2490	0.00950752	1.05302		32953471	GENE_ID=BRCA2	2098	0.00801075	0.887246		32953471
32953316	GENE_ID=BRCA2	1009	0.00407231	0.00386704	1.05308		32953316	GENE_ID=BRCA2	649	0.00277341	0.717192		32953316	GENE_ID=BRCA2	660	0.00346453	0.895913		32953316	GENE_ID=BRCA2	806	0.00437039	1.13016		32953316	GENE_ID=BRCA2	738	0.00393648	1.01796		32953316	GENE_ID=BRCA2	1136	0.00426555	1.10305		32953316	GENE_ID=BRCA2	1127	0.0043032	1.11279		32953316	GENE_ID=BRCA2	983	0.00375337	0.970606		32953316
32950844	GENE_ID=BRCA2	2848	0.0114945	0.010536	1.09097		32950844	GENE_ID=BRCA2	2502	0.0106919	1.0148		32950844	GENE_ID=BRCA2	2592	0.0136062	1.2914		32950844	GENE_ID=BRCA2	2277	0.0123466	1.17185		32950844	GENE_ID=BRCA2	2263	0.0120708	1.14567		32950844	GENE_ID=BRCA2	2449	0.0091957	0.872789		32950844	GENE_ID=BRCA2	2421	0.00924406	0.877378		32950844	GENE_ID=BRCA2	2126	0.00811766	0.770469		32950844
32950739	GENE_ID=BRCA2	1719	0.00693786	0.00696587	0.995979		32950739	GENE_ID=BRCA2	2116	0.00904243	1.2981		32950739	GENE_ID=BRCA2	1385	0.00727026	1.0437		32950739	GENE_ID=BRCA2	927	0.00502649	0.721588		32950739	GENE_ID=BRCA2	1152	0.00614475	0.882123		32950739	GENE_ID=BRCA2	2100	0.00788525	1.13198		32950739	GENE_ID=BRCA2	2002	0.0076442	1.09738		32950739	GENE_ID=BRCA2	1907	0.00728146	1.04531		32950739
32945202	GENE_ID=BRCA2	266	0.00107357	0.000727382	1.47594	ex20-IVS20	32945202	GENE_ID=BRCA2	105	0.000448703	0.616874		32945202	GENE_ID=BRCA2	40	0.000209972	0.288668		32945202	GENE_ID=BRCA2	184	0.000997706	1.37164		32945202	GENE_ID=BRCA2	82	0.000437387	0.601317		32945202	GENE_ID=BRCA2	182	0.000683388	0.939518		32945202	GENE_ID=BRCA2	203	0.000775111	1.06562		32945202	GENE_ID=BRCA2	311	0.00118749	1.63255		32945202
32945049	GENE_ID=BRCA2	55	0.000221979	0.00020879	1.06317		32945049	GENE_ID=BRCA2	57	0.000243581	1.16663		32945049	GENE_ID=BRCA2	58	0.000304459	1.4582		32945049	GENE_ID=BRCA2	39	0.00021147	1.01284		32945049	GENE_ID=BRCA2	28	0.000149352	0.715319		32945049	GENE_ID=BRCA2	62	0.000232803	1.11501		32945049	GENE_ID=BRCA2	62	0.000236733	1.13383		32945049	GENE_ID=BRCA2	47	0.000179459	0.859519		32945049
32944566	GENE_ID=BRCA2	1287	0.00519431	0.00480779	1.08039		32944566	GENE_ID=BRCA2	1173	0.00501265	1.04261		32944566	GENE_ID=BRCA2	1018	0.00534378	1.11148		32944566	GENE_ID=BRCA2	861	0.00466862	0.971052		32944566	GENE_ID=BRCA2	1132	0.00603807	1.25589		32944566	GENE_ID=BRCA2	1229	0.00461475	0.959848		32944566	GENE_ID=BRCA2	1316	0.00502486	1.04515		32944566	GENE_ID=BRCA2	1090	0.00416193	0.865662		32944566
32944476	GENE_ID=BRCA2	788	0.00318036	0.0026659	1.19297		32944476	GENE_ID=BRCA2	428	0.001829	0.68607		32944476	GENE_ID=BRCA2	351	0.0018425	0.691135		32944476	GENE_ID=BRCA2	623	0.0033781	1.26715		32944476	GENE_ID=BRCA2	362	0.0019309	0.724296		32944476	GENE_ID=BRCA2	792	0.00297387	1.11552		32944476	GENE_ID=BRCA2	655	0.00250097	0.938133		32944476	GENE_ID=BRCA2	918	0.00350518	1.31482		32944476
32937669	GENE_ID=BRCA2	992	0.0040037	0.00451522	0.886711		32937669	GENE_ID=BRCA2	1362	0.00582031	1.28904		32937669	GENE_ID=BRCA2	1115	0.00585296	1.29627		32937669	GENE_ID=BRCA2	804	0.00435954	0.965522		32937669	GENE_ID=BRCA2	883	0.00470991	1.04312		32937669	GENE_ID=BRCA2	1162	0.00436317	0.966325		32937669	GENE_ID=BRCA2	1139	0.00434902	0.963191		32937669	GENE_ID=BRCA2	1129	0.00431084	0.954735		32937669
32937551	GENE_ID=BRCA2	1500	0.00605398	0.00560185	1.08071		32937551	GENE_ID=BRCA2	1591	0.00679891	1.21369		32937551	GENE_ID=BRCA2	1160	0.00608917	1.08699		32937551	GENE_ID=BRCA2	760	0.00412096	0.735642		32937551	GENE_ID=BRCA2	1182	0.00630477	1.12548		32937551	GENE_ID=BRCA2	1526	0.00572995	1.02287		32937551	GENE_ID=BRCA2	1537	0.0058687	1.04763		32937551	GENE_ID=BRCA2	1338	0.00510886	0.911994		32937551
32937396	GENE_ID=BRCA2	892	0.0036001	0.00348218	1.03386		32937396	GENE_ID=BRCA2	568	0.00242727	0.697054		32937396	GENE_ID=BRCA2	549	0.00288186	0.827602		32937396	GENE_ID=BRCA2	745	0.00403963	1.16008		32937396	GENE_ID=BRCA2	763	0.00406983	1.16876		32937396	GENE_ID=BRCA2	986	0.00370231	1.06322		32937396	GENE_ID=BRCA2	959	0.00366173	1.05156		32937396	GENE_ID=BRCA2	889	0.00339445	0.974806		32937396
32937281	GENE_ID=BRCA2	2256	0.00910518	0.00862223	1.05601		32937281	GENE_ID=BRCA2	2512	0.0107347	1.245		32937281	GENE_ID=BRCA2	2021	0.0106088	1.2304		32937281	GENE_ID=BRCA2	1732	0.00939145	1.08921		32937281	GENE_ID=BRCA2	1535	0.00818767	0.9496		32937281	GENE_ID=BRCA2	2354	0.00883899	1.02514		32937281	GENE_ID=BRCA2	2082	0.00794966	0.921996		32937281	GENE_ID=BRCA2	1996	0.00762129	0.883912		32937281
32936704	GENE_ID=BRCA2	1343	0.00542033	0.00498516	1.08729		32936704	GENE_ID=BRCA2	1416	0.00605108	1.21382		32936704	GENE_ID=BRCA2	944	0.00495533	0.994015		32936704	GENE_ID=BRCA2	700	0.00379562	0.761384		32936704	GENE_ID=BRCA2	1034	0.00551534	1.10635		32936704	GENE_ID=BRCA2	1398	0.00524932	1.05299		32936704	GENE_ID=BRCA2	1513	0.00577706	1.15885		32936704	GENE_ID=BRCA2	1262	0.00481867	0.966602		32936704
32936625	GENE_ID=BRCA2	1391	0.00561405	0.0047978	1.17013		32936625	GENE_ID=BRCA2	808	0.00345287	0.719679		32936625	GENE_ID=BRCA2	686	0.00360101	0.750555		32936625	GENE_ID=BRCA2	1060	0.00574766	1.19798		32936625	GENE_ID=BRCA2	700	0.00373379	0.77823		32936625	GENE_ID=BRCA2	1450	0.00544458	1.13481		32936625	GENE_ID=BRCA2	1267	0.00483776	1.00833		32936625	GENE_ID=BRCA2	1485	0.00567015	1.18182		32936625
32931954	GENE_ID=BRCA2	1796	0.00724863	0.00798582	0.907688		32931954	GENE_ID=BRCA2	2057	0.0087903	1.10074		32931954	GENE_ID=BRCA2	1908	0.0100156	1.25418		32931954	GENE_ID=BRCA2	1835	0.00994995	1.24595		32931954	GENE_ID=BRCA2	1452	0.00774495	0.969838		32931954	GENE_ID=BRCA2	1968	0.00738961	0.925341		32931954	GENE_ID=BRCA2	1979	0.00755638	0.946225		32931954	GENE_ID=BRCA2	1923	0.00734255	0.919449		32931954
32931882	GENE_ID=BRCA2	2060	0.00831413	0.00798883	1.04072		32931882	GENE_ID=BRCA2	2650	0.0113244	1.41753		32931882	GENE_ID=BRCA2	1382	0.00725452	0.908082		32931882	GENE_ID=BRCA2	1173	0.00636038	0.796158		32931882	GENE_ID=BRCA2	1266	0.00675283	0.845283		32931882	GENE_ID=BRCA2	2362	0.00886903	1.11018		32931882	GENE_ID=BRCA2	2343	0.00894623	1.11984		32931882	GENE_ID=BRCA2	1942	0.0074151	0.928183		32931882
32931801	GENE_ID=BRCA2	1025	0.00413688	0.00300256	1.37779	IVS15-ex16	32931801	GENE_ID=BRCA2	420	0.00179481	0.597761		32931801	GENE_ID=BRCA2	386	0.00202623	0.674833		32931801	GENE_ID=BRCA2	695	0.00376851	1.2551		32931801	GENE_ID=BRCA2	349	0.00186156	0.619992		32931801	GENE_ID=BRCA2	867	0.00325548	1.08424		32931801	GENE_ID=BRCA2	820	0.00313099	1.04277		32931801	GENE_ID=BRCA2	1080	0.00412374	1.37341		32931801
32930743	GENE_ID=BRCA2	3183	0.0128465	0.00970002	1.32438		32930743	GENE_ID=BRCA2	2470	0.0105552	1.08816		32930743	GENE_ID=BRCA2	1885	0.00989491	1.02009		32930743	GENE_ID=BRCA2	2030	0.0110073	1.13477		32930743	GENE_ID=BRCA2	1582	0.00843837	0.869933		32930743	GENE_ID=BRCA2	2491	0.00935341	0.964267		32930743	GENE_ID=BRCA2	2308	0.00881259	0.908513		32930743	GENE_ID=BRCA2	2226	0.00849949	0.876234		32930743
32930604	GENE_ID=BRCA2	2139	0.00863297	0.00789748	1.09313		32930604	GENE_ID=BRCA2	2099	0.00896978	1.13578		32930604	GENE_ID=BRCA2	1675	0.00879256	1.11334		32930604	GENE_ID=BRCA2	1043	0.00565548	0.716111		32930604	GENE_ID=BRCA2	1853	0.00988388	1.25152		32930604	GENE_ID=BRCA2	2083	0.00782142	0.990368		32930604	GENE_ID=BRCA2	2216	0.00846131	1.07139		32930604	GENE_ID=BRCA2	1881	0.00718219	0.909427		32930604
32930410	GENE_ID=BRCA2	519	0.00209468	0.00196129	1.06801		32930410	GENE_ID=BRCA2	348	0.00148713	0.758239		32930410	GENE_ID=BRCA2	333	0.00174801	0.891256		32930410	GENE_ID=BRCA2	426	0.00230991	1.17775		32930410	GENE_ID=BRCA2	437	0.00233095	1.18848		32930410	GENE_ID=BRCA2	444	0.00166717	0.850035		32930410	GENE_ID=BRCA2	489	0.00186714	0.951994		32930410	GENE_ID=BRCA2	549	0.00209624	1.0688		32930410
32929223	GENE_ID=BRCA2	749	0.00302295	0.00413291	0.731434		32929223	GENE_ID=BRCA2	1248	0.00533315	1.29041		32929223	GENE_ID=BRCA2	1134	0.00595269	1.44032		32929223	GENE_ID=BRCA2	734	0.00397998	0.962997		32929223	GENE_ID=BRCA2	845	0.00450722	1.09057		32929223	GENE_ID=BRCA2	1061	0.00398393	0.963952		32929223	GENE_ID=BRCA2	1119	0.00427266	1.03381		32929223	GENE_ID=BRCA2	1015	0.00387555	0.93773		32929223
32929068	GENE_ID=BRCA2	1111	0.00448398	0.00414814	1.08096		32929068	GENE_ID=BRCA2	1218	0.00520495	1.25477		32929068	GENE_ID=BRCA2	817	0.00428867	1.03388		32929068	GENE_ID=BRCA2	635	0.00344317	0.830051		32929068	GENE_ID=BRCA2	868	0.0046299	1.11614		32929068	GENE_ID=BRCA2	1115	0.00418669	1.00929		32929068	GENE_ID=BRCA2	1253	0.00478431	1.15336		32929068	GENE_ID=BRCA2	982	0.00374955	0.903911		32929068
32928914	GENE_ID=BRCA2	747	0.00301488	0.00304843	0.988994		32928914	GENE_ID=BRCA2	506	0.00216232	0.709322		32928914	GENE_ID=BRCA2	495	0.0025984	0.852372		32928914	GENE_ID=BRCA2	693	0.00375767	1.23266		32928914	GENE_ID=BRCA2	554	0.00295503	0.96936		32928914	GENE_ID=BRCA2	786	0.00295134	0.968149		32928914	GENE_ID=BRCA2	828	0.00316154	1.0371		32928914	GENE_ID=BRCA2	879	0.00335627	1.10098		32928914
32920982	GENE_ID=BRCA2	1668	0.00673202	0.00681507	0.987814		32920982	GENE_ID=BRCA2	1967	0.0084057	1.2334		32920982	GENE_ID=BRCA2	1544	0.0081049	1.18926		32920982	GENE_ID=BRCA2	1390	0.00753702	1.10593		32920982	GENE_ID=BRCA2	1232	0.00657147	0.964256		32920982	GENE_ID=BRCA2	1656	0.00621808	0.912402		32920982	GENE_ID=BRCA2	1820	0.00694927	1.01969		32920982	GENE_ID=BRCA2	1703	0.00650253	0.95414		32920982
32920865	GENE_ID=BRCA2	1175	0.00474228	0.00399318	1.1876		32920865	GENE_ID=BRCA2	1326	0.00566647	1.41904		32920865	GENE_ID=BRCA2	522	0.00274013	0.686203		32920865	GENE_ID=BRCA2	566	0.00306903	0.768569		32920865	GENE_ID=BRCA2	538	0.00286969	0.718647		32920865	GENE_ID=BRCA2	1190	0.00446831	1.11899		32920865	GENE_ID=BRCA2	1126	0.00429938	1.07668		32920865	GENE_ID=BRCA2	1321	0.00504395	1.26314		32920865
32918626	GENE_ID=BRCA2	282	0.00113815	0.00129022	0.882133		32918626	GENE_ID=BRCA2	212	0.000905952	0.702167		32918626	GENE_ID=BRCA2	299	0.00156954	1.21649		32918626	GENE_ID=BRCA2	361	0.00195746	1.51715		32918626	GENE_ID=BRCA2	241	0.00128549	0.996333		32918626	GENE_ID=BRCA2	275	0.00103259	0.800321		32918626	GENE_ID=BRCA2	306	0.00116839	0.905576		32918626	GENE_ID=BRCA2	295	0.00112639	0.873022		32918626
32915285	GENE_ID=BRCA2	2312	0.0093312	0.00931287	1.00197		32915285	GENE_ID=BRCA2	2503	0.0106962	1.14854		32915285	GENE_ID=BRCA2	2197	0.0115327	1.23836		32915285	GENE_ID=BRCA2	1972	0.0106928	1.14818		32915285	GENE_ID=BRCA2	1768	0.00943049	1.01263		32915285	GENE_ID=BRCA2	2263	0.0084973	0.912425		32915285	GENE_ID=BRCA2	2311	0.00882405	0.947511		32915285	GENE_ID=BRCA2	2308	0.00881259	0.946281		32915285
32915186	GENE_ID=BRCA2	1312	0.00529521	0.0050739	1.04362		32915186	GENE_ID=BRCA2	1467	0.00626902	1.23554		32915186	GENE_ID=BRCA2	1003	0.00526504	1.03767		32915186	GENE_ID=BRCA2	670	0.00363295	0.716008		32915186	GENE_ID=BRCA2	1219	0.00650213	1.28149		32915186	GENE_ID=BRCA2	1404	0.00527185	1.03901		32915186	GENE_ID=BRCA2	1528	0.00583433	1.14987		32915186	GENE_ID=BRCA2	1146	0.00437575	0.862404		32915186
32915034	GENE_ID=BRCA2	1070	0.0043185	0.00462587	0.933555		32915034	GENE_ID=BRCA2	832	0.00355543	0.768598		32915034	GENE_ID=BRCA2	835	0.00438316	0.947531		32915034	GENE_ID=BRCA2	1111	0.00602419	1.30228		32915034	GENE_ID=BRCA2	910	0.00485393	1.0493		32915034	GENE_ID=BRCA2	1115	0.00418669	0.905061		32915034	GENE_ID=BRCA2	1240	0.00473467	1.02352		32915034	GENE_ID=BRCA2	1238	0.00472703	1.02187		32915034
32914877	GENE_ID=BRCA2	1283	0.00517817	0.00515448	1.0046		32914877	GENE_ID=BRCA2	1546	0.00660661	1.28172		32914877	GENE_ID=BRCA2	1021	0.00535952	1.03978		32914877	GENE_ID=BRCA2	1020	0.00553076	1.073		32914877	GENE_ID=BRCA2	857	0.00457123	0.886846		32914877	GENE_ID=BRCA2	1399	0.00525308	1.01913		32914877	GENE_ID=BRCA2	1358	0.00518522	1.00597		32914877	GENE_ID=BRCA2	1430	0.00546014	1.0593		32914877
32914740	GENE_ID=BRCA2	1282	0.00517413	0.00450894	1.14753		32914740	GENE_ID=BRCA2	1253	0.00535452	1.18753		32914740	GENE_ID=BRCA2	702	0.003685	0.817266		32914740	GENE_ID=BRCA2	732	0.00396914	0.880282		32914740	GENE_ID=BRCA2	927	0.00494461	1.09662		32914740	GENE_ID=BRCA2	1270	0.0047687	1.05761		32914740	GENE_ID=BRCA2	1329	0.00507449	1.12543		32914740	GENE_ID=BRCA2	1151	0.00439484	0.974696		32914740
32914665	GENE_ID=BRCA2	2176	0.0087823	0.00767434	1.14437		32914665	GENE_ID=BRCA2	1208	0.00516222	0.672659		32914665	GENE_ID=BRCA2	1151	0.00604193	0.78729		32914665	GENE_ID=BRCA2	1910	0.0103566	1.34951		32914665	GENE_ID=BRCA2	1421	0.0075796	0.987654		32914665	GENE_ID=BRCA2	2037	0.00764869	0.996658		32914665	GENE_ID=BRCA2	2234	0.00853004	1.1115		32914665	GENE_ID=BRCA2	2015	0.00769384	1.00254		32914665
32914500	GENE_ID=BRCA2	1416	0.00571495	0.00586776	0.973959		32914500	GENE_ID=BRCA2	1657	0.00708095	1.20676		32914500	GENE_ID=BRCA2	1285	0.00674534	1.14956		32914500	GENE_ID=BRCA2	1177	0.00638207	1.08765		32914500	GENE_ID=BRCA2	981	0.00523264	0.891762		32914500	GENE_ID=BRCA2	1680	0.0063082	1.07506		32914500	GENE_ID=BRCA2	1472	0.00562051	0.957863		32914500	GENE_ID=BRCA2	1601	0.00611307	1.04181		32914500
32914403	GENE_ID=BRCA2	1963	0.00792264	0.0071388	1.1098		32914403	GENE_ID=BRCA2	2381	0.0101749	1.42529		32914403	GENE_ID=BRCA2	1258	0.00660361	0.92503		32914403	GENE_ID=BRCA2	803	0.00435412	0.609923		32914403	GENE_ID=BRCA2	1260	0.00672082	0.94145		32914403	GENE_ID=BRCA2	2164	0.00812556	1.13822		32914403	GENE_ID=BRCA2	2185	0.00834294	1.16868		32914403	GENE_ID=BRCA2	1746	0.00666672	0.93387		32914403
32914318	GENE_ID=BRCA2	2198	0.00887109	0.00778257	1.13987		32914318	GENE_ID=BRCA2	1350	0.00576903	0.741277		32914318	GENE_ID=BRCA2	1155	0.00606293	0.77904		32914318	GENE_ID=BRCA2	1747	0.00947279	1.21718		32914318	GENE_ID=BRCA2	1474	0.0078623	1.01024		32914318	GENE_ID=BRCA2	2106	0.00790778	1.01609		32914318	GENE_ID=BRCA2	2133	0.00814439	1.04649		32914318	GENE_ID=BRCA2	2108	0.00804894	1.03423		32914318
32914173	GENE_ID=BRCA2	1053	0.00424989	0.00398539	1.06637		32914173	GENE_ID=BRCA2	1035	0.00442293	1.10978		32914173	GENE_ID=BRCA2	805	0.00422568	1.06029		32914173	GENE_ID=BRCA2	664	0.00360042	0.903404		32914173	GENE_ID=BRCA2	735	0.00392048	0.983713		32914173	GENE_ID=BRCA2	1319	0.00495269	1.24271		32914173	GENE_ID=BRCA2	1053	0.00402065	1.00885		32914173	GENE_ID=BRCA2	1068	0.00407792	1.02322		32914173
32914026	GENE_ID=BRCA2	1678	0.00677238	0.00599741	1.12922		32914026	GENE_ID=BRCA2	1719	0.0073459	1.22485		32914026	GENE_ID=BRCA2	1050	0.00551175	0.919022		32914026	GENE_ID=BRCA2	835	0.00452763	0.754932		32914026	GENE_ID=BRCA2	1230	0.0065608	1.09394		32914026	GENE_ID=BRCA2	1850	0.00694653	1.15825		32914026	GENE_ID=BRCA2	1628	0.00621616	1.03647		32914026	GENE_ID=BRCA2	1565	0.00597561	0.996365		32914026
32913899	GENE_ID=BRCA2	1421	0.00573513	0.00589636	0.972658		32913899	GENE_ID=BRCA2	993	0.00424344	0.719672		32913899	GENE_ID=BRCA2	899	0.00471911	0.800344		32913899	GENE_ID=BRCA2	1421	0.00770511	1.30676		32913899	GENE_ID=BRCA2	1143	0.00609675	1.03399		32913899	GENE_ID=BRCA2	1613	0.00605662	1.02718		32913899	GENE_ID=BRCA2	1700	0.00649108	1.10086		32913899	GENE_ID=BRCA2	1634	0.00623907	1.05812		32913899
32913762	GENE_ID=BRCA2	1818	0.00733742	0.00642186	1.14257		32913762	GENE_ID=BRCA2	1627	0.00695275	1.08267		32913762	GENE_ID=BRCA2	1190	0.00624665	0.972717		32913762	GENE_ID=BRCA2	1305	0.00707612	1.10188		32913762	GENE_ID=BRCA2	1196	0.00637945	0.993395		32913762	GENE_ID=BRCA2	1848	0.00693902	1.08053		32913762	GENE_ID=BRCA2	1578	0.00602525	0.93824		32913762	GENE_ID=BRCA2	1716	0.00655217	1.02029		32913762
32913556	GENE_ID=BRCA2	641	0.00258707	0.00278711	0.928226		32913556	GENE_ID=BRCA2	600	0.00256401	0.919955		32913556	GENE_ID=BRCA2	583	0.00306034	1.09803		32913556	GENE_ID=BRCA2	569	0.0030853	1.10699		32913556	GENE_ID=BRCA2	687	0.00366445	1.31479		32913556	GENE_ID=BRCA2	714	0.00268099	0.961923		32913556	GENE_ID=BRCA2	787	0.00300499	1.07817		32913556	GENE_ID=BRCA2	656	0.00250479	0.898706		32913556
32913468	GENE_ID=BRCA2	2331	0.00940788	0.00789483	1.19165		32913468	GENE_ID=BRCA2	1328	0.00567502	0.718827		32913468	GENE_ID=BRCA2	1062	0.00557474	0.706126		32913468	GENE_ID=BRCA2	1851	0.0100367	1.2713		32913468	GENE_ID=BRCA2	1344	0.00716888	0.908047		32913468	GENE_ID=BRCA2	2261	0.00848979	1.07536		32913468	GENE_ID=BRCA2	2129	0.00812912	1.02968		32913468	GENE_ID=BRCA2	2305	0.00880114	1.1148		32913468
32913326	GENE_ID=BRCA2	1531	0.00617909	0.00652506	0.946979		32913326	GENE_ID=BRCA2	1770	0.00756384	1.1592		32913326	GENE_ID=BRCA2	1574	0.00826238	1.26625		32913326	GENE_ID=BRCA2	1245	0.00675078	1.03459		32913326	GENE_ID=BRCA2	1282	0.00683817	1.04799		32913326	GENE_ID=BRCA2	1805	0.00677756	1.0387		32913326	GENE_ID=BRCA2	1658	0.00633071	0.970215		32913326	GENE_ID=BRCA2	1555	0.00593743	0.909942		32913326
32913282	GENE_ID=BRCA2	1147	0.00462927	0.004409	1.04996		32913282	GENE_ID=BRCA2	1313	0.00561092	1.27261		32913282	GENE_ID=BRCA2	824	0.00432541	0.981042		32913282	GENE_ID=BRCA2	589	0.00319374	0.72437		32913282	GENE_ID=BRCA2	815	0.0043472	0.985983		32913282	GENE_ID=BRCA2	1222	0.00458847	1.0407		32913282	GENE_ID=BRCA2	1363	0.00520432	1.18039		32913282	GENE_ID=BRCA2	1191	0.00454757	1.03143		32913282
32913170	GENE_ID=BRCA2	1164	0.00469789	0.00385589	1.21837		32913170	GENE_ID=BRCA2	604	0.00258111	0.669394		32913170	GENE_ID=BRCA2	489	0.0025669	0.665709		32913170	GENE_ID=BRCA2	781	0.00423483	1.09828		32913170	GENE_ID=BRCA2	733	0.00390981	1.01398		32913170	GENE_ID=BRCA2	1267	0.00475743	1.23381		32913170	GENE_ID=BRCA2	1047	0.00399774	1.03679		32913170	GENE_ID=BRCA2	1031	0.00393665	1.02094		32913170
32913092	GENE_ID=BRCA2	2192	0.00884688	0.00653083	1.35463		32913092	GENE_ID=BRCA2	1564	0.00668353	1.02338		32913092	GENE_ID=BRCA2	1292	0.00678208	1.03847		32913092	GENE_ID=BRCA2	1140	0.00618144	0.946501		32913092	GENE_ID=BRCA2	1283	0.00684351	1.04788		32913092	GENE_ID=BRCA2	1873	0.00703289	1.07688		32913092	GENE_ID=BRCA2	1565	0.00597561	0.914984		32913092	GENE_ID=BRCA2	1455	0.0055556	0.850672		32913092
32912987	GENE_ID=BRCA2	1531	0.00617909	0.00702505	0.87958		32912987	GENE_ID=BRCA2	2013	0.00860227	1.22451		32912987	GENE_ID=BRCA2	1485	0.00779519	1.10963		32912987	GENE_ID=BRCA2	1012	0.00548738	0.781117		32912987	GENE_ID=BRCA2	1505	0.00802765	1.14272		32912987	GENE_ID=BRCA2	2391	0.00897792	1.27799		32912987	GENE_ID=BRCA2	2003	0.00764802	1.08868		32912987	GENE_ID=BRCA2	1492	0.00569687	0.810937		32912987
32912830	GENE_ID=BRCA2	1391	0.00561405	0.00450248	1.24688		32912830	GENE_ID=BRCA2	735	0.00314092	0.697598		32912830	GENE_ID=BRCA2	623	0.00327031	0.726335		32912830	GENE_ID=BRCA2	987	0.00535183	1.18864		32912830	GENE_ID=BRCA2	783	0.00417651	0.927603		32912830	GENE_ID=BRCA2	1213	0.00455467	1.01159		32912830	GENE_ID=BRCA2	1228	0.00468885	1.04139		32912830	GENE_ID=BRCA2	1315	0.00502104	1.11517		32912830
32912744	GENE_ID=BRCA2	1772	0.00715177	0.00602841	1.18634		32912744	GENE_ID=BRCA2	1739	0.00743137	1.23273		32912744	GENE_ID=BRCA2	1291	0.00677683	1.12415		32912744	GENE_ID=BRCA2	1110	0.00601877	0.998402		32912744	GENE_ID=BRCA2	996	0.00531265	0.88127		32912744	GENE_ID=BRCA2	1648	0.00618804	1.02648		32912744	GENE_ID=BRCA2	1546	0.00590306	0.979208		32912744	GENE_ID=BRCA2	1493	0.00570069	0.945639		32912744
32912642	GENE_ID=BRCA2	1954	0.00788631	0.00715664	1.10196		32912642	GENE_ID=BRCA2	2292	0.00979454	1.36859		32912642	GENE_ID=BRCA2	1123	0.00589495	0.823703		32912642	GENE_ID=BRCA2	885	0.00479875	0.670531		32912642	GENE_ID=BRCA2	1221	0.0065128	0.910035		32912642	GENE_ID=BRCA2	2176	0.00817062	1.14168		32912642	GENE_ID=BRCA2	2226	0.00849949	1.18764		32912642	GENE_ID=BRCA2	1987	0.00758692	1.06012		32912642
32912492	GENE_ID=BRCA2	1327	0.00535575	0.00509105	1.05199		32912492	GENE_ID=BRCA2	895	0.00382466	0.751251		32912492	GENE_ID=BRCA2	816	0.00428342	0.841363		32912492	GENE_ID=BRCA2	1164	0.00631158	1.23974		32912492	GENE_ID=BRCA2	916	0.00488593	0.959711		32912492	GENE_ID=BRCA2	1189	0.00446455	0.876942		32912492	GENE_ID=BRCA2	1441	0.00550214	1.08075		32912492	GENE_ID=BRCA2	1563	0.00596797	1.17225		32912492
32912369	GENE_ID=BRCA2	859	0.00346691	0.0036477	0.950438		32912369	GENE_ID=BRCA2	1083	0.00462805	1.26876		32912369	GENE_ID=BRCA2	770	0.00404195	1.10808		32912369	GENE_ID=BRCA2	770	0.00417518	1.14461		32912369	GENE_ID=BRCA2	539	0.00287502	0.788174		32912369	GENE_ID=BRCA2	912	0.00342445	0.938798		32912369	GENE_ID=BRCA2	1000	0.00381828	1.04676		32912369	GENE_ID=BRCA2	1093	0.00417338	1.14411		32912369
32912221	GENE_ID=BRCA2	580	0.00234087	0.0020409	1.14698		32912221	GENE_ID=BRCA2	587	0.00250846	1.2291		32912221	GENE_ID=BRCA2	314	0.00164828	0.807624		32912221	GENE_ID=BRCA2	350	0.00189781	0.929891		32912221	GENE_ID=BRCA2	367	0.00195757	0.959173		32912221	GENE_ID=BRCA2	534	0.00200511	0.982463		32912221	GENE_ID=BRCA2	646	0.00246661	1.20859		32912221	GENE_ID=BRCA2	549	0.00209624	1.02711		32912221
32912112	GENE_ID=BRCA2	2115	0.00853611	0.00715786	1.19255		32912112	GENE_ID=BRCA2	1098	0.00469215	0.655524		32912112	GENE_ID=BRCA2	1038	0.00544876	0.761228		32912112	GENE_ID=BRCA2	1673	0.00907154	1.26735		32912112	GENE_ID=BRCA2	1076	0.00573937	0.801828		32912112	GENE_ID=BRCA2	2154	0.00808801	1.12995		32912112	GENE_ID=BRCA2	1939	0.00740365	1.03434		32912112	GENE_ID=BRCA2	2172	0.00829331	1.15863		32912112
32911942	GENE_ID=BRCA2	1598	0.0064495	0.00676534	0.953316		32911942	GENE_ID=BRCA2	1788	0.00764076	1.1294		32911942	GENE_ID=BRCA2	1379	0.00723877	1.06998		32911942	GENE_ID=BRCA2	1386	0.00751533	1.11086		32911942	GENE_ID=BRCA2	1354	0.00722222	1.06753		32911942	GENE_ID=BRCA2	1886	0.00708171	1.04676		32911942	GENE_ID=BRCA2	1698	0.00648344	0.958332		32911942	GENE_ID=BRCA2	1778	0.0067889	1.00348		32911942
32911783	GENE_ID=BRCA2	1610	0.00649794	0.00526921	1.23319		32911783	GENE_ID=BRCA2	1478	0.00631602	1.19867		32911783	GENE_ID=BRCA2	815	0.00427817	0.811919		32911783	GENE_ID=BRCA2	698	0.00378478	0.718282		32911783	GENE_ID=BRCA2	996	0.00531265	1.00824		32911783	GENE_ID=BRCA2	1568	0.00588765	1.11737		32911783	GENE_ID=BRCA2	1647	0.00628871	1.19348		32911783	GENE_ID=BRCA2	1469	0.00560905	1.0645		32911783
32911558	GENE_ID=BRCA2	743	0.00299874	0.00282382	1.06194		32911558	GENE_ID=BRCA2	515	0.00220078	0.779363		32911558	GENE_ID=BRCA2	269	0.00141206	0.500053		32911558	GENE_ID=BRCA2	705	0.00382273	1.35375		32911558	GENE_ID=BRCA2	601	0.00320573	1.13525		32911558	GENE_ID=BRCA2	622	0.00233554	0.827085		32911558	GENE_ID=BRCA2	837	0.0031959	1.13177		32911558	GENE_ID=BRCA2	773	0.00295153	1.04523		32911558
32911487	GENE_ID=BRCA2	2081	0.00839888	0.00865807	0.970064		32911487	GENE_ID=BRCA2	2382	0.0101791	1.17568		32911487	GENE_ID=BRCA2	1921	0.0100839	1.16468		32911487	GENE_ID=BRCA2	1678	0.00909865	1.05089		32911487	GENE_ID=BRCA2	1515	0.00808099	0.933348		32911487	GENE_ID=BRCA2	2471	0.00927831	1.07164		32911487	GENE_ID=BRCA2	2289	0.00874004	1.00947		32911487	GENE_ID=BRCA2	2211	0.00844222	0.975069		32911487
32911328	GENE_ID=BRCA2	1356	0.0054728	0.00500029	1.0945		32911328	GENE_ID=BRCA2	1317	0.00562801	1.12554		32911328	GENE_ID=BRCA2	982	0.0051548	1.0309		32911328	GENE_ID=BRCA2	781	0.00423483	0.846917		32911328	GENE_ID=BRCA2	1038	0.00553668	1.10727		32911328	GENE_ID=BRCA2	1347	0.00505783	1.01151		32911328	GENE_ID=BRCA2	1491	0.00569306	1.13855		32911328	GENE_ID=BRCA2	1220	0.0046583	0.931607		32911328
32911239	GENE_ID=BRCA2	1743	0.00703472	0.00590303	1.19171		32911239	GENE_ID=BRCA2	979	0.00418362	0.708723		32911239	GENE_ID=BRCA2	910	0.00477685	0.80922		32911239	GENE_ID=BRCA2	1412	0.00765631	1.29701		32911239	GENE_ID=BRCA2	1043	0.00556335	0.942456		32911239	GENE_ID=BRCA2	1649	0.0061918	1.04892		32911239	GENE_ID=BRCA2	1659	0.00633453	1.0731		32911239	GENE_ID=BRCA2	1500	0.00572742	0.970251		32911239
32911145	GENE_ID=BRCA2	2797	0.0112886	0.0089821	1.25679		32911145	GENE_ID=BRCA2	2314	0.00988855	1.10092		32911145	GENE_ID=BRCA2	1992	0.0104566	1.16416		32911145	GENE_ID=BRCA2	1707	0.0092559	1.03048		32911145	GENE_ID=BRCA2	1619	0.00863573	0.961437		32911145	GENE_ID=BRCA2	2292	0.00860619	0.958149		32911145	GENE_ID=BRCA2	2226	0.00849949	0.94627		32911145	GENE_ID=BRCA2	1974	0.00753729	0.839145		32911145
32911006	GENE_ID=BRCA2	1305	0.00526696	0.00511773	1.02916		32911006	GENE_ID=BRCA2	1362	0.00582031	1.13729		32911006	GENE_ID=BRCA2	1114	0.00584771	1.14264		32911006	GENE_ID=BRCA2	809	0.00438665	0.857149		32911006	GENE_ID=BRCA2	1121	0.0059794	1.16837		32911006	GENE_ID=BRCA2	1276	0.00479123	0.936203		32911006	GENE_ID=BRCA2	1511	0.00576942	1.12734		32911006	GENE_ID=BRCA2	1133	0.00432611	0.845319		32911006
32910962	GENE_ID=BRCA2	1098	0.00443151	0.00422897	1.04789		32910962	GENE_ID=BRCA2	716	0.00305972	0.723516		32910962	GENE_ID=BRCA2	786	0.00412594	0.975638		32910962	GENE_ID=BRCA2	1028	0.00557414	1.31809		32910962	GENE_ID=BRCA2	745	0.00397382	0.939667		32910962	GENE_ID=BRCA2	969	0.00363848	0.860371		32910962	GENE_ID=BRCA2	1212	0.00462776	1.0943		32910962	GENE_ID=BRCA2	1154	0.0044063	1.04193		32910962
32910799	GENE_ID=BRCA2	1654	0.00667552	0.00684637	0.975044		32910799	GENE_ID=BRCA2	1879	0.00802964	1.17283		32910799	GENE_ID=BRCA2	1430	0.00750648	1.09642		32910799	GENE_ID=BRCA2	1447	0.00784609	1.14602		32910799	GENE_ID=BRCA2	1183	0.00631011	0.921671		32910799	GENE_ID=BRCA2	1879	0.00705542	1.03053		32910799	GENE_ID=BRCA2	1626	0.00620852	0.906834		32910799	GENE_ID=BRCA2	1962	0.00749147	1.09422		32910799
32910628	GENE_ID=BRCA2	1405	0.00567056	0.00482367	1.17557		32910628	GENE_ID=BRCA2	1174	0.00501692	1.04006		32910628	GENE_ID=BRCA2	823	0.00432016	0.895619		32910628	GENE_ID=BRCA2	779	0.00422399	0.875679		32910628	GENE_ID=BRCA2	1055	0.00562736	1.16661		32910628	GENE_ID=BRCA2	1430	0.00536948	1.11315		32910628	GENE_ID=BRCA2	1327	0.00506686	1.05042		32910628	GENE_ID=BRCA2	1273	0.00486067	1.00767		32910628
32910478	GENE_ID=BRCA2	1487	0.00600151	0.00526144	1.14066		32910478	GENE_ID=BRCA2	882	0.0037691	0.716363		32910478	GENE_ID=BRCA2	567	0.00297635	0.56569		32910478	GENE_ID=BRCA2	1110	0.00601877	1.14394		32910478	GENE_ID=BRCA2	909	0.00484859	0.921533		32910478	GENE_ID=BRCA2	1499	0.00562857	1.06978		32910478	GENE_ID=BRCA2	1392	0.00531505	1.01019		32910478	GENE_ID=BRCA2	1719	0.00656362	1.24749		32910478
32910325	GENE_ID=BRCA2	1468	0.00592483	0.00665989	0.889628		32910325	GENE_ID=BRCA2	1849	0.00790144	1.18642		32910325	GENE_ID=BRCA2	1805	0.00947497	1.42269		32910325	GENE_ID=BRCA2	1603	0.00869197	1.30512		32910325	GENE_ID=BRCA2	1156	0.00616609	0.925855		32910325	GENE_ID=BRCA2	1502	0.00563983	0.846836		32910325	GENE_ID=BRCA2	1630	0.0062238	0.93452		32910325	GENE_ID=BRCA2	1589	0.00606725	0.911013		32910325
32907510	GENE_ID=BRCA2	1042	0.0042055	0.00406066	1.03567		32907510	GENE_ID=BRCA2	1032	0.00441011	1.08606		32907510	GENE_ID=BRCA2	908	0.00476635	1.17379		32907510	GENE_ID=BRCA2	801	0.00434328	1.0696		32907510	GENE_ID=BRCA2	836	0.00445921	1.09815		32907510	GENE_ID=BRCA2	949	0.00356338	0.877538		32907510	GENE_ID=BRCA2	1065	0.00406647	1.00143		32907510	GENE_ID=BRCA2	933	0.00356246	0.87731		32907510
32907354	GENE_ID=BRCA2	1008	0.00406827	0.00390271	1.04242		32907354	GENE_ID=BRCA2	694	0.00296571	0.759911		32907354	GENE_ID=BRCA2	637	0.0033438	0.856788		32907354	GENE_ID=BRCA2	964	0.00522711	1.33935		32907354	GENE_ID=BRCA2	701	0.00373913	0.958084		32907354	GENE_ID=BRCA2	1033	0.00387879	0.993871		32907354	GENE_ID=BRCA2	1069	0.00408174	1.04587		32907354	GENE_ID=BRCA2	1108	0.00423065	1.08403		32907354
32907270	GENE_ID=BRCA2	844	0.00340637	0.00434914	0.783229		32907270	GENE_ID=BRCA2	1142	0.00488018	1.1221		32907270	GENE_ID=BRCA2	1201	0.0063044	1.44957		32907270	GENE_ID=BRCA2	830	0.00450052	1.03481		32907270	GENE_ID=BRCA2	845	0.00450722	1.03635		32907270	GENE_ID=BRCA2	1155	0.00433689	0.997184		32907270	GENE_ID=BRCA2	1078	0.00411611	0.946419		32907270	GENE_ID=BRCA2	1115	0.00425738	0.978903		32907270
32907126	GENE_ID=BRCA2	1634	0.0065948	0.00636379	1.0363		32907126	GENE_ID=BRCA2	1781	0.00761085	1.19596		32907126	GENE_ID=BRCA2	1160	0.00608917	0.956847		32907126	GENE_ID=BRCA2	972	0.00527049	0.8282		32907126	GENE_ID=BRCA2	1282	0.00683817	1.07454		32907126	GENE_ID=BRCA2	1893	0.00710799	1.11694		32907126	GENE_ID=BRCA2	1931	0.0073731	1.1586		32907126	GENE_ID=BRCA2	1657	0.00632689	0.994201		32907126
32906979	GENE_ID=BRCA2	1746	0.00704683	0.00656085	1.07407		32906979	GENE_ID=BRCA2	1070	0.00457249	0.696936		32906979	GENE_ID=BRCA2	950	0.00498682	0.760088		32906979	GENE_ID=BRCA2	1475	0.00799792	1.21904		32906979	GENE_ID=BRCA2	1241	0.00661948	1.00894		32906979	GENE_ID=BRCA2	1681	0.00631196	0.962063		32906979	GENE_ID=BRCA2	1952	0.00745328	1.13602		32906979	GENE_ID=BRCA2	1786	0.00681945	1.03941		32906979
32906844	GENE_ID=BRCA2	1283	0.00517817	0.00607285	0.852675		32906844	GENE_ID=BRCA2	1696	0.00724762	1.19344		32906844	GENE_ID=BRCA2	1558	0.00817839	1.34671		32906844	GENE_ID=BRCA2	1231	0.00667487	1.09913		32906844	GENE_ID=BRCA2	1226	0.00653947	1.07684		32906844	GENE_ID=BRCA2	1553	0.00583133	0.960229		32906844	GENE_ID=BRCA2	1381	0.00527305	0.868298		32906844	GENE_ID=BRCA2	1513	0.00577706	0.951292		32906844
32906761	GENE_ID=BRCA2	1763	0.00711544	0.0066321	1.07288		32906761	GENE_ID=BRCA2	2011	0.00859372	1.29578		32906761	GENE_ID=BRCA2	1501	0.00787918	1.18804		32906761	GENE_ID=BRCA2	906	0.00491262	0.740733		32906761	GENE_ID=BRCA2	1225	0.00653413	0.985228		32906761	GENE_ID=BRCA2	1940	0.00728447	1.09836		32906761	GENE_ID=BRCA2	1849	0.00706	1.06452		32906761	GENE_ID=BRCA2	1407	0.00537232	0.810048		32906761
32906649	GENE_ID=BRCA2	1408	0.00568267	0.00490338	1.15893		32906649	GENE_ID=BRCA2	830	0.00354689	0.723355		32906649	GENE_ID=BRCA2	749	0.00393172	0.801838		32906649	GENE_ID=BRCA2	1159	0.00628447	1.28166		32906649	GENE_ID=BRCA2	896	0.00477925	0.974685		32906649	GENE_ID=BRCA2	1313	0.00493016	1.00546		32906649	GENE_ID=BRCA2	1349	0.00515086	1.05047		32906649	GENE_ID=BRCA2	1295	0.00494467	1.00842		32906649
32906432	GENE_ID=BRCA2	569	0.00229648	0.00329275	0.697433		32906432	GENE_ID=BRCA2	1072	0.00458104	1.39125		32906432	GENE_ID=BRCA2	962	0.00504982	1.53362		32906432	GENE_ID=BRCA2	664	0.00360042	1.09344		32906432	GENE_ID=BRCA2	595	0.00317372	0.963851		32906432	GENE_ID=BRCA2	698	0.00262091	0.795962		32906432	GENE_ID=BRCA2	821	0.00313481	0.952033		32906432	GENE_ID=BRCA2	830	0.00316917	0.962469		32906432
32906268	GENE_ID=BRCA2	1187	0.00479071	0.00459923	1.04163		32906268	GENE_ID=BRCA2	1322	0.00564938	1.22833		32906268	GENE_ID=BRCA2	782	0.00410494	0.892529		32906268	GENE_ID=BRCA2	700	0.00379562	0.825274		32906268	GENE_ID=BRCA2	928	0.00494994	1.07625		32906268	GENE_ID=BRCA2	1265	0.00474992	1.03277		32906268	GENE_ID=BRCA2	1455	0.0055556	1.20794		32906268	GENE_ID=BRCA2	1260	0.00481103	1.04605		32906268
32905132	GENE_ID=BRCA2	806	0.003253	0.0032513	1.00052		32905132	GENE_ID=BRCA2	570	0.00243581	0.749182		32905132	GENE_ID=BRCA2	530	0.00278212	0.855696		32905132	GENE_ID=BRCA2	851	0.00461439	1.41925		32905132	GENE_ID=BRCA2	609	0.0032484	0.999108		32905132	GENE_ID=BRCA2	855	0.00321042	0.987428		32905132	GENE_ID=BRCA2	910	0.00347464	1.06869		32905132	GENE_ID=BRCA2	837	0.0031959	0.982962		32905132
32904954	GENE_ID=BRCA2	906	0.0036566	0.00440334	0.830415		32904954	GENE_ID=BRCA2	1239	0.00529469	1.20243		32904954	GENE_ID=BRCA2	1220	0.00640413	1.45438		32904954	GENE_ID=BRCA2	833	0.00451679	1.02576		32904954	GENE_ID=BRCA2	864	0.00460857	1.04661		32904954	GENE_ID=BRCA2	1110	0.00416792	0.946535		32904954	GENE_ID=BRCA2	1150	0.00439102	0.997202		32904954	GENE_ID=BRCA2	999	0.00381446	0.866265		32904954
32903521	GENE_ID=BRCA2	486	0.00196149	0.00183768	1.06737		32903521	GENE_ID=BRCA2	468	0.00199993	1.08829		32903521	GENE_ID=BRCA2	366	0.00192124	1.04547		32903521	GENE_ID=BRCA2	375	0.00203337	1.10649		32903521	GENE_ID=BRCA2	410	0.00218693	1.19005		32903521	GENE_ID=BRCA2	384	0.00144187	0.784615		32903521	GENE_ID=BRCA2	563	0.00214969	1.16978		32903521	GENE_ID=BRCA2	434	0.00165713	0.901752		32903521
32900654	GENE_ID=BRCA2	1861	0.00751097	0.00679445	1.10546		32900654	GENE_ID=BRCA2	1153	0.00492718	0.725178		32900654	GENE_ID=BRCA2	874	0.00458788	0.675239		32900654	GENE_ID=BRCA2	1640	0.0088926	1.3088		32900654	GENE_ID=BRCA2	1257	0.00670482	0.986809		32900654	GENE_ID=BRCA2	1924	0.00722439	1.06328		32900654	GENE_ID=BRCA2	1980	0.0075602	1.1127		32900654	GENE_ID=BRCA2	1924	0.00734637	1.08123		32900654
32900497	GENE_ID=BRCA2	1465	0.00591272	0.006727	0.878953		32900497	GENE_ID=BRCA2	1824	0.00779461	1.1587		32900497	GENE_ID=BRCA2	1754	0.00920725	1.3687		32900497	GENE_ID=BRCA2	1267	0.00687008	1.02127		32900497	GENE_ID=BRCA2	1291	0.00688618	1.02366		32900497	GENE_ID=BRCA2	1923	0.00722064	1.07338		32900497	GENE_ID=BRCA2	1604	0.00612452	0.910439		32900497	GENE_ID=BRCA2	1628	0.00621616	0.924062		32900497
32900398	GENE_ID=BRCA2	2609	0.0105299	0.00990753	1.06282		32900398	GENE_ID=BRCA2	3134	0.0133927	1.35177		32900398	GENE_ID=BRCA2	1813	0.00951696	0.960579		32900398	GENE_ID=BRCA2	1513	0.00820397	0.828054		32900398	GENE_ID=BRCA2	1504	0.00802232	0.809719		32900398	GENE_ID=BRCA2	3103	0.0116514	1.17601		32900398	GENE_ID=BRCA2	2776	0.0105995	1.06985		32900398	GENE_ID=BRCA2	2223	0.00848804	0.856726		32900398
32900295	GENE_ID=BRCA2	545	0.00219961	0.00195698	1.12398		32900295	GENE_ID=BRCA2	308	0.00131619	0.672563		32900295	GENE_ID=BRCA2	239	0.00125458	0.641078		32900295	GENE_ID=BRCA2	569	0.0030853	1.57656		32900295	GENE_ID=BRCA2	345	0.00184023	0.940338		32900295	GENE_ID=BRCA2	516	0.00193752	0.990053		32900295	GENE_ID=BRCA2	498	0.0019015	0.97165		32900295	GENE_ID=BRCA2	567	0.00216496	1.10628		32900295
32900212	GENE_ID=BRCA2	970	0.00391491	0.00405563	0.9653		32900212	GENE_ID=BRCA2	1063	0.00454258	1.12007		32900212	GENE_ID=BRCA2	1014	0.00532278	1.31244		32900212	GENE_ID=BRCA2	726	0.0039366	0.97065		32900212	GENE_ID=BRCA2	741	0.00395248	0.974566		32900212	GENE_ID=BRCA2	1126	0.004228	1.0425		32900212	GENE_ID=BRCA2	1050	0.00400919	0.988549		32900212	GENE_ID=BRCA2	1008	0.00384883	0.949007		32900212
32899235	GENE_ID=BRCA2	835	0.00337005	0.00287765	1.17111		32899235	GENE_ID=BRCA2	813	0.00347424	1.20732		32899235	GENE_ID=BRCA2	515	0.00270338	0.939441		32899235	GENE_ID=BRCA2	504	0.00273285	0.94968		32899235	GENE_ID=BRCA2	526	0.00280568	0.974989		32899235	GENE_ID=BRCA2	794	0.00298138	1.03604		32899235	GENE_ID=BRCA2	860	0.00328372	1.14111		32899235	GENE_ID=BRCA2	687	0.00262316	0.911562		32899235
32899095	GENE_ID=BRCA2	1069	0.00431447	0.00389576	1.10748		32899095	GENE_ID=BRCA2	633	0.00270504	0.694353		32899095	GENE_ID=BRCA2	480	0.00251966	0.646769		32899095	GENE_ID=BRCA2	857	0.00464693	1.19281		32899095	GENE_ID=BRCA2	761	0.00405916	1.04194		32899095	GENE_ID=BRCA2	1190	0.00446831	1.14697		32899095	GENE_ID=BRCA2	1137	0.00434138	1.11439		32899095	GENE_ID=BRCA2	1076	0.00410847	1.0546		32899095
32893271	GENE_ID=BRCA2	897	0.00362028	0.00473172	0.765109		32893271	GENE_ID=BRCA2	1305	0.00557673	1.17859		32893271	GENE_ID=BRCA2	1129	0.00592645	1.25249		32893271	GENE_ID=BRCA2	989	0.00536267	1.13335		32893271	GENE_ID=BRCA2	885	0.00472058	0.997646		32893271	GENE_ID=BRCA2	1237	0.00464479	0.981628		32893271	GENE_ID=BRCA2	1247	0.0047614	1.00627		32893271	GENE_ID=BRCA2	1380	0.00526923	1.1136		32893271
32893189	GENE_ID=BRCA2	1590	0.00641722	0.00555958	1.15426		32893189	GENE_ID=BRCA2	1661	0.00709805	1.27672		32893189	GENE_ID=BRCA2	855	0.00448814	0.807281		32893189	GENE_ID=BRCA2	744	0.0040342	0.725631		32893189	GENE_ID=BRCA2	916	0.00488593	0.878832		32893189	GENE_ID=BRCA2	1737	0.00652223	1.17315		32893189	GENE_ID=BRCA2	1706	0.00651399	1.17167		32893189	GENE_ID=BRCA2	1478	0.00564342	1.01508		32893189
32890544	GENE_ID=BRCA2	1102	0.00444766	0.00443609	1.00261		32890544	GENE_ID=BRCA2	782	0.00334177	0.753313		32890544	GENE_ID=BRCA2	647	0.00339629	0.765604		32890544	GENE_ID=BRCA2	945	0.00512409	1.15509		32890544	GENE_ID=BRCA2	913	0.00486993	1.0978		32890544	GENE_ID=BRCA2	1066	0.0040027	0.902304		32890544	GENE_ID=BRCA2	1188	0.00453612	1.02255		32890544	GENE_ID=BRCA2	1358	0.00518522	1.16887		32890544
		247771							234008						190502						184423						187477						266320						261898						245160
[truncated: 5 more columns]

## Sheet: matrix of normalized reads
ciaffo	cindy	BR1154	BR963	kissy	mino	rina	sandrino	ulderico	average of normalized reads (for amplicon) of all chip patients
0.0030512	0.00319647	0.00236743	0.0031341	0.00150952	0.00295885	0.00272625	0.00371901	0.00146622	0.00268101
0.00767644	0.010162	0.00925975	0.00628989	0.00871574	0.00975143	0.00854149	0.00676217	0.00646817	0.00818079
0.00592079	0.00430327	0.00465087	0.00804672	0.00636345	0.00576374	0.0061207	0.00708291	0.0066629	0.00610171
0.00635264	0.0066408	0.0091915	0.00701648	0.00721155	0.00684515	0.00504777	0.00609016	0.00458575	0.00655353
0.00582796	0.00827749	0.00688707	0.00562837	0.00716888	0.00739336	0.00703709	0.00671636	0.00503631	0.00666365
0.00433868	0.00299135	0.00310758	0.00516747	0.0040485	0.00461475	0.00446739	0.00470794	0.00480722	0.0042501
0.00470596	0.00668781	0.00903928	0.00592117	0.00600074	0.00535446	0.00507449	0.00499431	0.00364646	0.00571385
0.00552123	0.00647414	0.00493433	0.00536809	0.00611808	0.00622559	0.00694163	0.00613216	0.00406265	0.0057531
0.00424182	0.00235462	0.00429392	0.00549823	0.00320573	0.005959	0.00440248	0.00323408	0.00436048	0.00417226
0.00357185	0.00539725	0.0102414	0.00674536	0.0056807	0.00290252	0.00591833	0.00254297	0.00344791	0.00516092
0.00244177	0.00443147	0.00211021	0.00178394	0.00220827	0.00313908	0.00312335	0.00326463	0.00214969	0.00273916
0.00475843	0.00302126	0.00313907	0.00467946	0.00401649	0.00464103	0.00428793	0.0052005	0.00460866	0.00426143
0.00915361	0.0110167	0.0107243	0.00990657	0.00968652	0.00996546	0.00818257	0.00937006	0.00563578	0.00929351
0.00674009	0.0084698	0.00661935	0.00605673	0.00635811	0.0076562	0.00772056	0.00631544	0.00578088	0.00685746
0.00361624	0.00254265	0.00370075	0.00504275	0.00413384	0.00421673	0.00389465	0.00362355	0.003467	0.00380424
0.00735356	0.00835014	0.00847235	0.008795	0.00772895	0.00741965	0.00608252	0.00708673	0.00483394	0.00734698
0.0073011	0.00738436	0.00706029	0.00529218	0.00790497	0.00738585	0.00723946	0.00588015	0.00439102	0.00664882
0.00757554	0.00517931	0.00602093	0.00856726	0.00783029	0.00794157	0.00747619	0.0068729	0.00694927	0.00715703
0.00519835	0.0066408	0.00763772	0.00536267	0.00630477	0.00652974	0.00541432	0.00518141	0.00411229	0.00582023
0.00723652	0.00822621	0.00759047	0.00544401	0.00867306	0.00812556	0.00807948	0.00659799	0.00465067	0.00718044
0.00951282	0.00522632	0.00598419	0.0123575	0.00796364	0.00860243	0.00880114	0.00826276	0.00763656	0.00826081
0.00786613	0.00937147	0.0103358	0.00961377	0.00823034	0.00808801	0.00755256	0.00770529	0.00554032	0.00825597
0.00444362	0.00482889	0.00546451	0.003595	0.0051473	0.00424677	0.00566633	0.00390228	0.00287517	0.00446332
0.00808408	0.00492718	0.00636739	0.00880584	0.00664081	0.00782893	0.00767093	0.0076022	0.00712873	0.00722845
0.00608627	0.00677755	0.00820464	0.00668029	0.00796898	0.00764494	0.00604816	0.00528832	0.00388319	0.00650915
0.00752308	0.00995265	0.00843036	0.00694599	0.0073449	0.00852734	0.0093777	0.00801075	0.00646435	0.00806412
0.00484318	0.00307254	0.00385298	0.00557414	0.00421918	0.00522679	0.0045743	0.00418484	0.00421156	0.00441772
0.00814058	0.00906807	0.0113122	0.010362	0.00905178	0.00821568	0.00800693	0.00794584	0.00633835	0.00871572
0.00364046	0.00340587	0.00289236	0.00196288	0.00475258	0.00351081	0.00340972	0.00255443	0.00197405	0.00312257
0.00817287	0.00557673	0.00595794	0.00874078	0.00688084	0.00835461	0.0080833	0.00832385	0.00886223	0.00766146
0.011664	0.00910653	0.0108345	0.00980355	0.00903578	0.00898919	0.00833531	0.00632689	0.0059947	0.00889894
0.00425393	0.00462377	0.00350652	0.00292263	0.0043152	0.00419045	0.00510122	0.00406647	0.00285989	0.00398223
0.00684503	0.00467505	0.00554325	0.00754787	0.00554735	0.00668369	0.00744947	0.00726237	0.00718219	0.00652625
0.0119909	0.00905952	0.0118896	0.0100367	0.00985188	0.00898919	0.00840404	0.0068729	0.00782747	0.00943581
0.00495619	0.00545708	0.00461937	0.00368175	0.00551001	0.00448708	0.00514704	0.00437575	0.00291335	0.00457196
0.00364853	0.00296571	0.00425192	0.00610011	0.00507796	0.00409282	0.00466976	0.0043032	0.00450557	0.00440173
0.00855629	0.00836724	0.00651437	0.007434	0.00951583	0.00915816	0.00736928	0.00686527	0.0053685	0.00768321
0.00598537	0.0074271	0.00648287	0.00487466	0.00770761	0.0068076	0.00757165	0.00611689	0.00402829	0.00633356
0.005832	0.00392722	0.00623091	0.0072171	0.0075956	0.00576374	0.00675454	0.00572742	0.0060787	0.00612525
0.00726074	0.00937575	0.00937523	0.00858895	0.00741958	0.00850481	0.00748001	0.00777402	0.00486449	0.00784929
0.00728495	0.00849971	0.00738575	0.00616517	0.0103533	0.00764869	0.00832767	0.00695691	0.00457812	0.00746669
0.00326108	0.00217514	0.00236743	0.00387696	0.00321106	0.00305647	0.00364264	0.00423447	0.00345173	0.003253
0.00747464	0.0102518	0.0120734	0.0101668	0.0100972	0.00871132	0.0083124	0.00882786	0.00601761	0.00910367
0.00433465	0.00468787	0.00456163	0.00338895	0.00484859	0.00436693	0.00464303	0.00371519	0.00257734	0.00412491
0.0083787	0.00594424	0.00586346	0.0109965	0.00691285	0.00832833	0.00786566	0.00875914	0.00765565	0.00785605
0.00580375	0.00754675	0.00940148	0.00730928	0.00647546	0.00637203	0.0067049	0.00617416	0.00408556	0.0066526
0.00904061	0.0105253	0.00819414	0.00603504	0.00928114	0.00853109	0.00861786	0.00809475	0.00564342	0.00821815
0.00879037	0.00485026	0.00678733	0.00997706	0.0084597	0.009038	0.00784275	0.00734637	0.00762892	0.00785786
0.0077047	0.00893132	0.0099684	0.0086974	0.00911045	0.00835837	0.00731201	0.00710582	0.00566251	0.00809455
0.00835852	0.00991846	0.00957995	0.00683754	0.00949983	0.0090793	0.00915624	0.00783511	0.0058076	0.00845251
0.00245791	0.00145722	0.00171652	0.00268947	0.00220294	0.0020802	0.00224897	0.00193205	0.00191296	0.00207758
0.0144125	0.0114911	0.0127295	0.0134419	0.0118468	0.0110957	0.00994662	0.0101375	0.00833531	0.011493
0.00605801	0.00567502	0.00475586	0.00348655	0.00596873	0.00589892	0.00516995	0.00462394	0.00347082	0.00501198
0.00518624	0.00399986	0.00431492	0.00668029	0.00556335	0.00586137	0.00556323	0.00593743	0.00575033	0.00542856
0.00297048	0.00439301	0.00467187	0.00393118	0.00379247	0.00369105	0.00361591	0.00366173	0.00262698	0.00370608
0.00799529	0.00855954	0.00417318	0.00812805	0.0102199	0.00769375	0.00913714	0.00806039	0.00579233	0.00775107
0.00588043	0.00438019	0.00523879	0.00330219	0.00689151	0.00626314	0.00659417	0.00596415	0.00631925	0.0056482
0.00408442	0.00494428	0.00682932	0.00267862	0.00602741	0.00455467	0.00463157	0.00449793	0.0030279	0.00458624
0.00751097	0.00963642	0.00851435	0.00286841	0.0105293	0.00754731	0.00897296	0.00739219	0.00526923	0.00758235
0.0141946	0.00905952	0.0102624	0.0141902	0.0130736	0.0138067	0.0124438	0.0122987	0.00982062	0.0121278
0.0093877	0.00844843	0.0119106	0.0107687	0.0119321	0.00844473	0.00778547	0.00658653	0.00621234	0.00905297
0.0107801	0.013773	0.0149867	0.0106603	0.0118681	0.0115913	0.0126156	0.00984735	0.0083544	0.0116085
0.00911729	0.00590151	0.00828338	0.0113489	0.010988	0.0105437	0.0103399	0.00917151	0.00864841	0.0093714
0.00434272	0.00590578	0.00713378	0.0058073	0.00549401	0.00464854	0.00503631	0.00463921	0.00337154	0.00515324
0.00812847	0.0109526	0.0080944	0.00583441	0.00819301	0.00871883	0.00920969	0.00774729	0.00592215	0.00808899
0.00494005	0.00361099	0.00400521	0.00618144	0.00476858	0.00499024	0.00497904	0.00517759	0.00479958	0.00482808
0.00795493	0.00934583	0.0116324	0.0102753	0.010604	0.00874512	0.00815203	0.00759456	0.00555942	0.00887373
0.00450416	0.00395713	0.00323356	0.00328592	0.00410717	0.00416792	0.00407029	0.00349754	0.00245134	0.00369723
0.00491583	0.00292725	0.00344878	0.00559583	0.0043152	0.0043444	0.00460866	0.00483394	0.00462776	0.00440196
0.00322879	0.00558528	0.00693956	0.00478248	0.00424052	0.0039614	0.00392137	0.00368846	0.00252007	0.00431866
0.00668763	0.0078117	0.00605768	0.00530845	0.00611808	0.0062669	0.007186	0.00607107	0.0046163	0.00623598
0.00490776	0.00370073	0.00340679	0.00586152	0.00469924	0.00491889	0.00552887	0.00599088	0.00520813	0.00491365
0.00363642	0.0045554	0.00583721	0.00473911	0.00401116	0.00348828	0.00383355	0.00361209	0.0024017	0.00401277
0.00559791	0.00682028	0.0047716	0.00440292	0.00514196	0.00542205	0.00634216	0.00552505	0.00342882	0.00527253
0.00687328	0.00505111	0.00574272	0.00795454	0.00602207	0.006924	0.00722037	0.00703327	0.00716691	0.00666536
0.000169511	0.000235035	0.000251966	0.000206048	0.000202692	0.000123911	0.000168004	0.000202369	0.000168004	0.000191949
0.00575935	0.0074271	0.00566923	0.00446799	0.00560069	0.00571493	0.00704855	0.00600997	0.00410083	0.0057554
0.00339023	0.00467078	0.00473486	0.00420772	0.00349376	0.0037699	0.00388701	0.00380301	0.00262316	0.00384227
0.00905675	0.0109996	0.00992116	0.00692972	0.00981987	0.0102095	0.00950752	0.00801075	0.00680418	0.00902879
0.00407231	0.00277341	0.00346453	0.00437039	0.00393648	0.00426555	0.0043032	0.00375337	0.0038641	0.00386704
0.0114945	0.0106919	0.0136062	0.0123466	0.0120708	0.0091957	0.00924406	0.00811766	0.00805657	0.010536
0.00693786	0.00904243	0.00727026	0.00502649	0.00614475	0.00788525	0.0076442	0.00728146	0.00546014	0.00696587
0.00107357	0.000448703	0.000209972	0.000997706	0.000437387	0.000683388	0.000775111	0.00118749	0.00073311	0.000727382
0.000221979	0.000243581	0.000304459	0.00021147	0.000149352	0.000232803	0.000236733	0.000179459	9.92753e-05	0.00020879
0.00519431	0.00501265	0.00534378	0.00466862	0.00603807	0.00461475	0.00502486	0.00416193	0.00321117	0.00480779
0.00318036	0.001829	0.0018425	0.0033781	0.0019309	0.00297387	0.00250097	0.00350518	0.00285226	0.0026659
0.0040037	0.00582031	0.00585296	0.00435954	0.00470991	0.00436317	0.00434902	0.00431084	0.00286753	0.00451522
0.00605398	0.00679891	0.00608917	0.00412096	0.00630477	0.00572995	0.0058687	0.00510886	0.00434138	0.00560185
0.0036001	0.00242727	0.00288186	0.00403963	0.00406983	0.00370231	0.00366173	0.00339445	0.00356246	0.00348218
0.00910518	0.0107347	0.0106088	0.00939145	0.00818767	0.00883899	0.00794966	0.00762129	0.00516232	0.00862223
0.00542033	0.00605108	0.00495533	0.00379562	0.00551534	0.00524932	0.00577706	0.00481867	0.00328372	0.00498516
0.00561405	0.00345287	0.00360101	0.00574766	0.00373379	0.00544458	0.00483776	0.00567015	0.00507831	0.0047978
0.00724863	0.0087903	0.0100156	0.00994995	0.00774495	0.00738961	0.00755638	0.00734255	0.00583433	0.00798582
0.00831413	0.0113244	0.00725452	0.00636038	0.00675283	0.00886903	0.00894623	0.0074151	0.0066629	0.00798883
0.00413688	0.00179481	0.00202623	0.00376851	0.00186156	0.00325548	0.00313099	0.00412374	0.0029248	0.00300256
0.0128465	0.0105552	0.00989491	0.0110073	0.00843837	0.00935341	0.00881259	0.00849949	0.00789239	0.00970002
0.00863297	0.00896978	0.00879256	0.00565548	0.00988388	0.00782142	0.00846131	0.00718219	0.00567778	0.00789748
0.00209468	0.00148713	0.00174801	0.00230991	0.00233095	0.00166717	0.00186714	0.00209624	0.00205042	0.00196129
0.00302295	0.00533315	0.00595269	0.00397998	0.00450722	0.00398393	0.00427266	0.00387555	0.00226806	0.00413291
0.00448398	0.00520495	0.00428867	0.00344317	0.0046299	0.00418669	0.00478431	0.00374955	0.00256207	0.00414814
0.00301488	0.00216232	0.0025984	0.00375767	0.00295503	0.00295134	0.00316154	0.00335627	0.00347845	0.00304843
0.00673202	0.0084057	0.0081049	0.00753702	0.00657147	0.00621808	0.00694927	0.00650253	0.00431466	0.00681507
0.00474228	0.00566647	0.00274013	0.00306903	0.00286969	0.00446831	0.00429938	0.00504395	0.00303935	0.00399318
0.00113815	0.000905952	0.00156954	0.00195746	0.00128549	0.00103259	0.00116839	0.00112639	0.00142804	0.00129022
0.0093312	0.0106962	0.0115327	0.0106928	0.00943049	0.0084973	0.00882405	0.00881259	0.00599852	0.00931287
0.00529521	0.00626902	0.00526504	0.00363295	0.00650213	0.00527185	0.00583433	0.00437575	0.00321881	0.0050739
0.0043185	0.00355543	0.00438316	0.00602419	0.00485393	0.00418669	0.00473467	0.00472703	0.00484922	0.00462587
0.00517817	0.00660661	0.00535952	0.00553076	0.00457123	0.00525308	0.00518522	0.00546014	0.00324554	0.00515448
0.00517413	0.00535452	0.003685	0.00396914	0.00494461	0.0047687	0.00507449	0.00439484	0.00321499	0.00450894
0.0087823	0.00516222	0.00604193	0.0103566	0.0075796	0.00764869	0.00853004	0.00769384	0.00727382	0.00767434
0.00571495	0.00708095	0.00674534	0.00638207	0.00523264	0.0063082	0.00562051	0.00611307	0.00361209	0.00586776
0.00792264	0.0101749	0.00660361	0.00435412	0.00672082	0.00812556	0.00834294	0.00666672	0.00533796	0.0071388
0.00887109	0.00576903	0.00606293	0.00947279	0.0078623	0.00790778	0.00814439	0.00804894	0.00790384	0.00778257
0.00424989	0.00442293	0.00422568	0.00360042	0.00392048	0.00495269	0.00402065	0.00407792	0.00239788	0.00398539
0.00677238	0.0073459	0.00551175	0.00452763	0.0065608	0.00694653	0.00621616	0.00597561	0.00411992	0.00599741
0.00573513	0.00424344	0.00471911	0.00770511	0.00609675	0.00605662	0.00649108	0.00623907	0.00578088	0.00589636
0.00733742	0.00695275	0.00624665	0.00707612	0.00637945	0.00693902	0.00602525	0.00655217	0.00428793	0.00642186
0.00258707	0.00256401	0.00306034	0.0030853	0.00366445	0.00268099	0.00300499	0.00250479	0.00193205	0.00278711
0.00940788	0.00567502	0.00557474	0.0100367	0.00716888	0.00848979	0.00812912	0.00880114	0.0077702	0.00789483
0.00617909	0.00756384	0.00826238	0.00675078	0.00683817	0.00677756	0.00633071	0.00593743	0.00408556	0.00652506
0.00462927	0.00561092	0.00432541	0.00319374	0.0043472	0.00458847	0.00520432	0.00454757	0.00323408	0.004409
0.00469789	0.00258111	0.0025669	0.00423483	0.00390981	0.00475743	0.00399774	0.00393665	0.00402065	0.00385589
0.00884688	0.00668353	0.00678208	0.00618144	0.00684351	0.00703289	0.00597561	0.0055556	0.00487594	0.00653083
0.00617909	0.00860227	0.00779519	0.00548738	0.00802765	0.00897792	0.00764802	0.00569687	0.00481103	0.00702505
0.00561405	0.00314092	0.00327031	0.00535183	0.00417651	0.00455467	0.00468885	0.00502104	0.00470412	0.00450248
0.00715177	0.00743137	0.00677683	0.00601877	0.00531265	0.00618804	0.00590306	0.00570069	0.00377246	0.00602841
0.00788631	0.00979454	0.00589495	0.00479875	0.0065128	0.00817062	0.00849949	0.00758692	0.00526541	0.00715664
0.00535575	0.00382466	0.00428342	0.00631158	0.00488593	0.00446455	0.00550214	0.00596797	0.00522341	0.00509105
0.00346691	0.00462805	0.00404195	0.00417518	0.00287502	0.00342445	0.00381828	0.00417338	0.00222606	0.0036477
0.00234087	0.00250846	0.00164828	0.00189781	0.00195757	0.00200511	0.00246661	0.00209624	0.00144713	0.0020409
0.00853611	0.00469215	0.00544876	0.00907154	0.00573937	0.00808801	0.00740365	0.00829331	0.00714782	0.00715786
0.0064495	0.00764076	0.00723877	0.00751533	0.00722222	0.00708171	0.00648344	0.0067889	0.00446739	0.00676534
0.00649794	0.00631602	0.00427817	0.00378478	0.00531265	0.00588765	0.00628871	0.00560905	0.00344791	0.00526921
0.00299874	0.00220078	0.00141206	0.00382273	0.00320573	0.00233554	0.0031959	0.00295153	0.00329136	0.00282382
0.00839888	0.0101791	0.0100839	0.00909865	0.00808099	0.00927831	0.00874004	0.00844222	0.00562051	0.00865807
0.0054728	0.00562801	0.0051548	0.00423483	0.00553668	0.00505783	0.00569306	0.0046583	0.00356627	0.00500029
0.00703472	0.00418362	0.00477685	0.00765631	0.00556335	0.0061918	0.00633453	0.00572742	0.00565869	0.00590303
0.0112886	0.00988855	0.0104566	0.0092559	0.00863573	0.00860619	0.00849949	0.00753729	0.00667054	0.0089821
0.00526696	0.00582031	0.00584771	0.00438665	0.0059794	0.00479123	0.00576942	0.00432611	0.00387174	0.00511773
0.00443151	0.00305972	0.00412594	0.00557414	0.00397382	0.00363848	0.00462776	0.0044063	0.00422302	0.00422897
0.00667552	0.00802964	0.00750648	0.00784609	0.00631011	0.00705542	0.00620852	0.00749147	0.00449412	0.00684637
0.00567056	0.00501692	0.00432016	0.00422399	0.00562736	0.00536948	0.00506686	0.00486067	0.00325699	0.00482367
0.00600151	0.0037691	0.00297635	0.00601877	0.00484859	0.00562857	0.00531505	0.00656362	0.00623143	0.00526144
0.00592483	0.00790144	0.00947497	0.00869197	0.00616609	0.00563983	0.0062238	0.00606725	0.00384883	0.00665989
0.0042055	0.00441011	0.00476635	0.00434328	0.00445921	0.00356338	0.00406647	0.00356246	0.00316917	0.00406066
0.00406827	0.00296571	0.0033438	0.00522711	0.00373913	0.00387879	0.00408174	0.00423065	0.00358918	0.00390271
0.00340637	0.00488018	0.0063044	0.00450052	0.00450722	0.00433689	0.00411611	0.00425738	0.00283316	0.00434914
0.0065948	0.00761085	0.00608917	0.00527049	0.00683817	0.00710799	0.0073731	0.00632689	0.00406265	0.00636379
0.00704683	0.00457249	0.00498682	0.00799792	0.00661948	0.00631196	0.00745328	0.00681945	0.00723946	0.00656085
0.00517817	0.00724762	0.00817839	0.00667487	0.00653947	0.00583133	0.00527305	0.00577706	0.00395574	0.00607285
0.00711544	0.00859372	0.00787918	0.00491262	0.00653413	0.00728447	0.00706	0.00537232	0.00493704	0.0066321
0.00568267	0.00354689	0.00393172	0.00628447	0.00477925	0.00493016	0.00515086	0.00494467	0.00487976	0.00490338
0.00229648	0.00458104	0.00504982	0.00360042	0.00317372	0.00262091	0.00313481	0.00316917	0.00200842	0.00329275
0.00479071	0.00564938	0.00410494	0.00379562	0.00494994	0.00474992	0.0055556	0.00481103	0.0029859	0.00459923
0.003253	0.00243581	0.00278212	0.00461439	0.0032484	0.00321042	0.00347464	0.0031959	0.00304699	0.0032513
0.0036566	0.00529469	0.00640413	0.00451679	0.00460857	0.00416792	0.00439102	0.00381446	0.00277589	0.00440334
0.00196149	0.00199993	0.00192124	0.00203337	0.00218693	0.00144187	0.00214969	0.00165713	0.00118749	0.00183768
0.00751097	0.00492718	0.00458788	0.0088926	0.00670482	0.00722439	0.0075602	0.00734637	0.00639562	0.00679445
0.00591272	0.00779461	0.00920725	0.00687008	0.00688618	0.00722064	0.00612452	0.00621616	0.00431084	0.006727
0.0105299	0.0133927	0.00951696	0.00820397	0.00802232	0.0116514	0.0105995	0.00848804	0.00876295	0.00990753
0.00219961	0.00131619	0.00125458	0.0030853	0.00184023	0.00193752	0.0019015	0.00216496	0.00191296	0.00195698
0.00391491	0.00454258	0.00532278	0.0039366	0.00395248	0.004228	0.00400919	0.00384883	0.00274534	0.00405563
0.00337005	0.00347424	0.00270338	0.00273285	0.00280568	0.00298138	0.00328372	0.00262316	0.00192441	0.00287765
0.00431447	0.00270504	0.00251966	0.00464693	0.00405916	0.00446831	0.00434138	0.00410847	0.00389846	0.00389576
0.00362028	0.00557673	0.00592645	0.00536267	0.00472058	0.00464479	0.0047614	0.00526923	0.00270334	0.00473172
0.00641722	0.00709805	0.00448814	0.0040342	0.00488593	0.00652223	0.00651399	0.00564342	0.00443302	0.00555958
0.00444766	0.00334177	0.00339629	0.00512409	0.00486993	0.0040027	0.00453612	0.00518522	0.00502104	0.00443609

## Sheet: matrix_DQ
ciaffo	cindy	BR1154	BR963	kissy	mino	rina	sandrino	ulderico
1.13808	1.19227	0.883038	1.169	0.563042	1.10363	1.01688	1.38717	0.546892
0.93835	1.24218	1.13189	0.768861	1.06539	1.19199	1.04409	0.826592	0.790653
0.97035	0.705257	0.762225	1.31877	1.0429	0.944612	1.00311	1.16081	1.09197
0.969346	1.01332	1.40253	1.07064	1.10041	1.0445	0.770236	0.929294	0.699738
0.87459	1.24219	1.03353	0.844636	1.07582	1.10951	1.05604	1.00791	0.755788
1.02084	0.703831	0.731178	1.21585	0.952566	1.0858	1.05113	1.10773	1.13108
0.823605	1.17045	1.58199	1.03628	1.05021	0.937102	0.888104	0.874071	0.638179
0.959696	1.12533	0.857682	0.933078	1.06344	1.08213	1.20659	1.06589	0.706167
1.01667	0.564351	1.02916	1.31781	0.768343	1.42824	1.05518	0.775139	1.04511
0.692095	1.04579	1.98441	1.30701	1.10071	0.562404	1.14676	0.492737	0.66808
0.891431	1.61782	0.770388	0.651274	0.806186	1.146	1.14026	1.19184	0.7848
1.11663	0.708979	0.736625	1.0981	0.942523	1.08908	1.00622	1.22037	1.08148
0.984947	1.18542	1.15396	1.06597	1.04229	1.0723	0.880461	1.00824	0.606421
0.982885	1.23512	0.965277	0.883232	0.927182	1.11648	1.12586	0.920958	0.843005
0.950582	0.668372	0.972796	1.32556	1.08664	1.10843	1.02376	0.952503	0.911351
1.0009	1.13654	1.15317	1.19709	1.05199	1.00989	0.827894	0.964577	0.657949
1.0981	1.11063	1.06189	0.795958	1.18893	1.11085	1.08883	0.88439	0.660421
1.05848	0.723667	0.841261	1.19704	1.09407	1.10962	1.04459	0.960301	0.970971
0.893152	1.14099	1.31227	0.921385	1.08325	1.1219	0.930259	0.890241	0.706551
1.00781	1.14564	1.0571	0.758172	1.20787	1.13162	1.12521	0.918883	0.647685
1.15156	0.632664	0.724407	1.49591	0.964027	1.04135	1.06541	1.00024	0.924432
0.952781	1.13511	1.25192	1.16446	0.996896	0.979656	0.914799	0.933299	0.671069
0.995586	1.08191	1.22432	0.805454	1.15324	0.951483	1.26953	0.874301	0.644177
1.11837	0.681637	0.880878	1.21822	0.918705	1.08307	1.06121	1.0517	0.986204
0.935033	1.04123	1.26048	1.02629	1.22427	1.17449	0.929178	0.812444	0.596574
0.932907	1.23419	1.04542	0.861345	0.910812	1.05744	1.16289	0.993382	0.801618
1.09631	0.695504	0.872163	1.26177	0.955058	1.18314	1.03544	0.947283	0.953333
0.934011	1.04043	1.29791	1.18889	1.03856	0.942628	0.918677	0.911668	0.727231
1.16585	1.09072	0.926274	0.628609	1.52201	1.12433	1.09196	0.818053	0.632187
1.06675	0.727894	0.777651	1.14088	0.898111	1.09047	1.05506	1.08646	1.15673
1.31072	1.02333	1.21751	1.10165	1.01538	1.01014	0.936663	0.710971	0.673642
1.06823	1.1611	0.880543	0.733917	1.08361	1.05229	1.281	1.02115	0.718163
1.04885	0.716346	0.849377	1.15654	0.850005	1.02412	1.14146	1.11279	1.10051
1.27079	0.960121	1.26006	1.06368	1.04409	0.952668	0.890654	0.728386	0.82955
1.08404	1.1936	1.01037	0.80529	1.20517	0.981436	1.12578	0.957084	0.637221
0.828885	0.67376	0.965966	1.38584	1.15363	0.929821	1.06089	0.977616	1.02359
1.11363	1.08903	0.84787	0.967563	1.23852	1.19197	0.95914	0.893541	0.698731
0.945024	1.17266	1.02357	0.769656	1.21695	1.07485	1.19548	0.96579	0.636022
0.952124	0.641152	1.01725	1.17826	1.24005	0.940981	1.10274	0.935051	0.992401
0.925019	1.19447	1.19441	1.09423	0.945255	1.08351	0.952954	0.990411	0.619737
0.97566	1.13835	0.989159	0.82569	1.38659	1.02437	1.11531	0.931725	0.613139
1.00248	0.668657	0.727769	1.19181	0.987108	0.939587	1.11978	1.30171	1.06109
0.821058	1.12612	1.32621	1.11678	1.10914	0.956902	0.913081	0.969703	0.661009
1.05085	1.13648	1.10587	0.821581	1.17544	1.05867	1.12561	0.900671	0.624823
1.06653	0.756645	0.746361	1.39974	0.879939	1.06012	1.00122	1.11495	0.974491
0.872403	1.13441	1.4132	1.09871	0.973373	0.957827	1.00786	0.928083	0.61413
1.10008	1.28074	0.997079	0.734355	1.12935	1.03808	1.04864	0.984985	0.686702
1.11867	0.617249	0.863763	1.26969	1.07659	1.15019	0.998076	0.934907	0.970865
0.951837	1.10337	1.23149	1.07448	1.1255	1.03259	0.903325	0.877852	0.699546
0.988881	1.17343	1.13339	0.808936	1.12391	1.07415	1.08326	0.926957	0.687087
1.18307	0.7014	0.826209	1.29452	1.06034	1.00126	1.08249	0.929951	0.920762
1.25403	0.999832	1.10759	1.16958	1.03078	0.96543	0.865451	0.882062	0.725251
1.20871	1.13229	0.948898	0.695644	1.19089	1.17696	1.03152	0.922578	0.692505
0.955362	0.736819	0.794855	1.23058	1.02483	1.07973	1.02481	1.09374	1.05927
0.801518	1.18535	1.2606	1.06074	1.02331	0.995945	0.975671	0.988035	0.70883
1.03151	1.1043	0.538401	1.04864	1.31852	0.992606	1.17882	1.03991	0.747295
1.04112	0.775502	0.927514	0.584644	1.22012	1.10887	1.16748	1.05594	1.11881
0.890581	1.07807	1.48909	0.584057	1.31424	0.993117	1.00989	0.980746	0.660214
0.990586	1.2709	1.12292	0.378301	1.38866	0.995379	1.1834	0.974921	0.694934
1.17042	0.747006	0.846186	1.17006	1.07799	1.13844	1.02606	1.01409	0.809762
1.03698	0.933222	1.31566	1.18952	1.31804	0.932813	0.859991	0.727555	0.686222
0.928636	1.18646	1.29101	0.918313	1.02236	0.998516	1.08675	0.848284	0.719676
0.972884	0.629736	0.883899	1.21102	1.1725	1.12509	1.10335	0.97867	0.922851
0.842716	1.14603	1.38433	1.12692	1.06613	0.902061	0.977309	0.90025	0.654256
1.00488	1.35402	1.00067	0.721279	1.01286	1.07786	1.13855	0.957758	0.732125
1.02319	0.747914	0.829565	1.28031	0.987678	1.03359	1.03127	1.07239	0.994097
0.896458	1.0532	1.31088	1.15795	1.19498	0.985507	0.91867	0.855848	0.626503
1.21825	1.0703	0.874591	0.888754	1.11088	1.12731	1.1009	0.945992	0.66302
1.11674	0.664988	0.783465	1.27121	0.980289	0.986923	1.04696	1.09813	1.05129
0.747637	1.29329	1.60688	1.1074	0.981907	0.917275	0.908007	0.854075	0.58353
1.07243	1.25268	0.971408	0.851262	0.981094	1.00496	1.15235	0.973555	0.740269
0.998801	0.753153	0.693332	1.19291	0.956366	1.00107	1.12521	1.21923	1.05993
0.906213	1.13523	1.45466	1.18101	0.999599	0.869296	0.955339	0.90015	0.598514
1.06171	1.29355	0.904993	0.835068	0.975237	1.02836	1.20287	1.04789	0.650317
1.03119	0.757814	0.861577	1.19341	0.903487	1.0388	1.08327	1.0552	1.07525
0.883107	1.22446	1.31267	1.07345	1.05597	0.645542	0.875256	1.05429	0.875256
1.00069	1.29046	0.985028	0.776312	0.973118	0.992968	1.22468	1.04423	0.712519
0.88235	1.21563	1.23231	1.09511	0.909297	0.981165	1.01164	0.989782	0.682711
1.0031	1.21828	1.09884	0.767514	1.08762	1.13077	1.05302	0.887246	0.753609
1.05308	0.717192	0.895913	1.13016	1.01796	1.10305	1.11279	0.970606	0.99924
1.09097	1.0148	1.2914	1.17185	1.14567	0.872789	0.877378	0.770469	0.764671
0.995979	1.2981	1.0437	0.721588	0.882123	1.13198	1.09738	1.04531	0.783842
1.47594	0.616874	0.288668	1.37164	0.601317	0.939518	1.06562	1.63255	1.00788
1.06317	1.16663	1.4582	1.01284	0.715319	1.11501	1.13383	0.859519	0.475479
1.08039	1.04261	1.11148	0.971052	1.25589	0.959848	1.04515	0.865662	0.66791
1.19297	0.68607	0.691135	1.26715	0.724296	1.11552	0.938133	1.31482	1.0699
0.886711	1.28904	1.29627	0.965522	1.04312	0.966325	0.963191	0.954735	0.635081
1.08071	1.21369	1.08699	0.735642	1.12548	1.02287	1.04763	0.911994	0.774991
1.03386	0.697054	0.827602	1.16008	1.16876	1.06322	1.05156	0.974806	1.02305
1.05601	1.245	1.2304	1.08921	0.9496	1.02514	0.921996	0.883912	0.598722
1.08729	1.21382	0.994015	0.761384	1.10635	1.05299	1.15885	0.966602	0.658699
1.17013	0.719679	0.750555	1.19798	0.77823	1.13481	1.00833	1.18182	1.05847
0.907688	1.10074	1.25418	1.24595	0.969838	0.925341	0.946225	0.919449	0.730587
1.04072	1.41753	0.908082	0.796158	0.845283	1.11018	1.11984	0.928183	0.834026
1.37779	0.597761	0.674833	1.2551	0.619992	1.08424	1.04277	1.37341	0.974104
1.32438	1.08816	1.02009	1.13477	0.869933	0.964267	0.908513	0.876234	0.813646
1.09313	1.13578	1.11334	0.716111	1.25152	0.990368	1.07139	0.909427	0.718936
1.06801	0.758239	0.891256	1.17775	1.18848	0.850035	0.951994	1.0688	1.04544
0.731434	1.29041	1.44032	0.962997	1.09057	0.963952	1.03381	0.93773	0.54878
1.08096	1.25477	1.03388	0.830051	1.11614	1.00929	1.15336	0.903911	0.617642
0.988994	0.709322	0.852372	1.23266	0.96936	0.968149	1.0371	1.10098	1.14106
0.987814	1.2334	1.18926	1.10593	0.964256	0.912402	1.01969	0.95414	0.633105
1.1876	1.41904	0.686203	0.768569	0.718647	1.11899	1.07668	1.26314	0.761136
0.882133	0.702167	1.21649	1.51715	0.996333	0.800321	0.905576	0.873022	1.10681
1.00197	1.14854	1.23836	1.14818	1.01263	0.912425	0.947511	0.946281	0.64411
1.04362	1.23554	1.03767	0.716008	1.28149	1.03901	1.14987	0.862404	0.634386
0.933555	0.768598	0.947531	1.30228	1.0493	0.905061	1.02352	1.02187	1.04828
1.0046	1.28172	1.03978	1.073	0.886846	1.01913	1.00597	1.0593	0.629654
1.14753	1.18753	0.817266	0.880282	1.09662	1.05761	1.12543	0.974696	0.713027
1.14437	0.672659	0.78729	1.34951	0.987654	0.996658	1.1115	1.00254	0.947811
0.973959	1.20676	1.14956	1.08765	0.891762	1.07506	0.957863	1.04181	0.615583
1.1098	1.42529	0.92503	0.609923	0.94145	1.13822	1.16868	0.93387	0.747738
1.13987	0.741277	0.77904	1.21718	1.01024	1.01609	1.04649	1.03423	1.01558
1.06637	1.10978	1.06029	0.903404	0.983713	1.24271	1.00885	1.02322	0.601667
1.12922	1.22485	0.919022	0.754932	1.09394	1.15825	1.03647	0.996365	0.68695
0.972658	0.719672	0.800344	1.30676	1.03399	1.02718	1.10086	1.05812	0.980415
1.14257	1.08267	0.972717	1.10188	0.993395	1.08053	0.93824	1.02029	0.667708
0.928226	0.919955	1.09803	1.10699	1.31479	0.961923	1.07817	0.898706	0.693209
1.19165	0.718827	0.706126	1.2713	0.908047	1.07536	1.02968	1.1148	0.984214
0.946979	1.1592	1.26625	1.03459	1.04799	1.0387	0.970215	0.909942	0.626134
1.04996	1.27261	0.981042	0.72437	0.985983	1.0407	1.18039	1.03143	0.733519
1.21837	0.669394	0.665709	1.09828	1.01398	1.23381	1.03679	1.02094	1.04273
1.35463	1.02338	1.03847	0.946501	1.04788	1.07688	0.914984	0.850672	0.746604
0.87958	1.22451	1.10963	0.781117	1.14272	1.27799	1.08868	0.810937	0.68484
1.24688	0.697598	0.726335	1.18864	0.927603	1.01159	1.04139	1.11517	1.04479
1.18634	1.23273	1.12415	0.998402	0.88127	1.02648	0.979208	0.945639	0.625781
1.10196	1.36859	0.823703	0.670531	0.910035	1.14168	1.18764	1.06012	0.735737
1.05199	0.751251	0.841363	1.23974	0.959711	0.876942	1.08075	1.17225	1.026
0.950438	1.26876	1.10808	1.14461	0.788174	0.938798	1.04676	1.14411	0.610264
1.14698	1.2291	0.807624	0.929891	0.959173	0.982463	1.20859	1.02711	0.709065
1.19255	0.655524	0.761228	1.26735	0.801828	1.12995	1.03434	1.15863	0.998598
0.953316	1.1294	1.06998	1.11086	1.06753	1.04676	0.958332	1.00348	0.660335
1.23319	1.19867	0.811919	0.718282	1.00824	1.11737	1.19348	1.0645	0.65435
1.06194	0.779363	0.500053	1.35375	1.13525	0.827085	1.13177	1.04523	1.16557
0.970064	1.17568	1.16468	1.05089	0.933348	1.07164	1.00947	0.975069	0.649164
1.0945	1.12554	1.0309	0.846917	1.10727	1.01151	1.13855	0.931607	0.713214
1.19171	0.708723	0.80922	1.29701	0.942456	1.04892	1.0731	0.970251	0.958608
1.25679	1.10092	1.16416	1.03048	0.961437	0.958149	0.94627	0.839145	0.742648
1.02916	1.13729	1.14264	0.857149	1.16837	0.936203	1.12734	0.845319	0.756534
1.04789	0.723516	0.975638	1.31809	0.939667	0.860371	1.0943	1.04193	0.998594
0.975044	1.17283	1.09642	1.14602	0.921671	1.03053	0.906834	1.09422	0.656423
1.17557	1.04006	0.895619	0.875679	1.16661	1.11315	1.05042	1.00767	0.675211
1.14066	0.716363	0.56569	1.14394	0.921533	1.06978	1.01019	1.24749	1.18436
0.889628	1.18642	1.42269	1.30512	0.925855	0.846836	0.93452	0.911013	0.577912
1.03567	1.08606	1.17379	1.0696	1.09815	0.877538	1.00143	0.87731	0.780458
1.04242	0.759911	0.856788	1.33935	0.958084	0.993871	1.04587	1.08403	0.919664
0.783229	1.1221	1.44957	1.03481	1.03635	0.997184	0.946419	0.978903	0.651431
1.0363	1.19596	0.956847	0.8282	1.07454	1.11694	1.1586	0.994201	0.638401
1.07407	0.696936	0.760088	1.21904	1.00894	0.962063	1.13602	1.03941	1.10343
0.852675	1.19344	1.34671	1.09913	1.07684	0.960229	0.868298	0.951292	0.65138
1.07288	1.29578	1.18804	0.740733	0.985228	1.09836	1.06452	0.810048	0.744415
1.15893	0.723355	0.801838	1.28166	0.974685	1.00546	1.05047	1.00842	0.995183
0.697433	1.39125	1.53362	1.09344	0.963851	0.795962	0.952033	0.962469	0.60995
1.04163	1.22833	0.892529	0.825274	1.07625	1.03277	1.20794	1.04605	0.649217
1.00052	0.749182	0.855696	1.41925	0.999108	0.987428	1.06869	0.982962	0.937161
0.830415	1.20243	1.45438	1.02576	1.04661	0.946535	0.997202	0.866265	0.630405
1.06737	1.08829	1.04547	1.10649	1.19005	0.784615	1.16978	0.901752	0.646186
1.10546	0.725178	0.675239	1.3088	0.986809	1.06328	1.1127	1.08123	0.941301
0.878953	1.1587	1.3687	1.02127	1.02366	1.07338	0.910439	0.924062	0.640826
1.06282	1.35177	0.960579	0.828054	0.809719	1.17601	1.06985	0.856726	0.884474
1.12398	0.672563	0.641078	1.57656	0.940338	0.990053	0.97165	1.10628	0.977503
0.9653	1.12007	1.31244	0.97065	0.974566	1.0425	0.988549	0.949007	0.676921
1.17111	1.20732	0.939441	0.94968	0.974989	1.03604	1.14111	0.911562	0.668744
1.10748	0.694353	0.646769	1.19281	1.04194	1.14697	1.11439	1.0546	1.00069
0.765109	1.17859	1.25249	1.13335	0.997646	0.981628	1.00627	1.1136	0.571324
1.15426	1.27672	0.807281	0.725631	0.878832	1.17315	1.17167	1.01508	0.797367
1.00261	0.753313	0.765604	1.15509	1.0978	0.902304	1.02255	1.16887	1.13186
1.03373	1.02181	1.0195	1.04475	1.0274	1.02791	1.04334	0.986605	0.794962
0.129891	0.241831	0.248526	0.220064	0.143749	0.106155	0.0948351	0.131947	0.175056

## Sheet: mean_stdev_DQ
mean DQ	1
STDEV	0.189362		0.378725	2STDEV
